# Supplementary material for: Computational insight into the cooperative role of non-covalent interactions in the aza-Henry reaction catalyzed by quinine derivatives: mechanism and enantioselectivity
Source: Royal Society of Chemistry journal article supplement (doi:10.1039/c6ob01611a), 2016-01-01
Supplement: c6ob01611a1.pdf [file c6ob01611a1.pdf]

## Supporting Information

### **Computational insight into the cooperative role of noncovalent interactions in the aza-Henry reaction catalyzed by quinine-derivatives: mechanism and enantioselectivity**

Yunsheng Xue,<sup>a,b</sup> Yuhui Wang,<sup>c</sup> Zhongyan Cao,<sup>c</sup> Jian Zhou,<sup>c</sup> Zhao-Xu Chen<sup>\*,a</sup>

<sup>a</sup>Institute of Theoretical and Computational Chemistry, Key Laboratory of Mesoscopic Chemistry of MOE, School of Chemistry and Chemical Engineering, Nanjing University, Nanjing, 210093, P. R. China

<sup>b</sup>School of Pharmacy, Xuzhou Medical University, No. 209, Tongshan Road, Xuzhou, 221004, P. R. China

<sup>c</sup>Shanghai Key Laboratory of Green Chemistry and Chemical Processes, East China Normal University, 3663 N. Zhongshan Road, Shanghai, 200062, P. R. China

Corresponding Author:

E-mail address: zxchen@nju.edu.cn (Z.-X. Chen);

## Table of contents

|                                                                                                                                                                                  |     |
|----------------------------------------------------------------------------------------------------------------------------------------------------------------------------------|-----|
| <b>Fig. S1.</b> The less-stable conformations and the relative free energy for <b>IM1a</b> and <b>TS1'</b> .....                                                                 | S5  |
| <b>Fig.S2</b> Two isomers of isatin-derived <i>N</i> -Boc ketimine ( <b>1</b> ).....                                                                                             | S6  |
| <b>Table S1</b> The optimized structure and relative free energy of TS2s involving the Z-ketimine.....                                                                           | S7  |
| <b>Table S2.</b> The optimized structure and relative free energy of the TS2s involving the E-ketimine in the mode <b>a</b> .....                                                | S10 |
| <b>Table S3.</b> The optimized structure and relative free energy of the TS2s involving the E-ketimine in the mode <b>b</b> .....                                                | S14 |
| <b>Fig. S3</b> Optimized structure of the possible complex of catalyst with substrates....                                                                                       | S18 |
| <b>Table S4</b> The relative energy of the possible complex of catalyst with substrates.....                                                                                     | S19 |
| <b>Fig. S4</b> Comparison of two couples of transition states with different orient of Boc group.....                                                                            | S20 |
| <b>Table S5</b> The optimized structure and relative free energy of transition states involved in the mode <b>c</b> .....                                                        | S21 |
| <b>Fig. S5</b> Optimized structure and relative free energy of the stationary points for the C-C bond formation leading to S- and R-product in modes <b>a</b> and <b>b</b> ..... | S23 |
| <b>Table S6.</b> NBO analysis of the lowest-energy transition states leading to the S-product for mode <b>a</b> and <b>b</b> .....                                               | S24 |

|                                                                                                                                                                                                      |     |
|------------------------------------------------------------------------------------------------------------------------------------------------------------------------------------------------------|-----|
| <b>Scheme S1.</b> Distortion/interaction analysis of the studied reaction.....                                                                                                                       | S24 |
| <b>Table S7</b> Distortion/interaction analysis of the five lowest energy transition states using the model catalyst.....                                                                            | S25 |
| <b>Table S8.</b> Comparison of the relative free energy of the lowest energy TSs leading to S-product in modes <b>a</b> and <b>b</b> at different level of theory.....                               | S25 |
| <b>Fig.S6</b> AIM plots depicting bond critical points (BCPs) along the bond paths in <b>si-TS2a</b> , <b>si-TS2b</b> and <b>re-TS2a</b> .....                                                       | S26 |
| <b>Table S9.</b> Summary of electron densities at the bond critical points (BCPs) along the bond paths, type and distance of interactions in <b>si-TS2a</b> , <b>si-TS2b</b> and <b>re-TS2a</b> .... | S27 |
| <b>Table S10.</b> Comparison of the relative free energy and their difference for the lowest energy stereocontrol TSs at different level of theory.....                                              | S28 |
| <b>Fig. S7</b> Optimized structure and relative free energy of the three less stable TS2s involving the real catalyst in modes <b>a</b> and <b>b</b> .....                                           | S28 |
| <b>Table S11</b> Distortion/interaction analysis of <b>si-TS2b-real</b> and <b>re-TS2a-real</b> .....                                                                                                | S29 |
| <b>Fig. S8.</b> NCI plots of the other three less stable TS2s involving the real catalyst.....                                                                                                       | S29 |
| <b>Table S12.</b> AIM analysis for <b>re-TS2a-real</b> .....                                                                                                                                         | S30 |
| <b>Table S13.</b> AIM analysis for <b>si-TS2b-real</b> .....                                                                                                                                         | S31 |
| <b>Table S14.</b> Comparison of the relative free energy of <b>si-TS2b-real</b> and <b>re-TS2a-real</b> involving the real catalyst at different level of theory.....                                | S32 |
| The optimized coordinates of all the stationary points in PES.....                                                                                                                                   | S33 |

### **Complete citing of reference 10.**

M. J. Frisch, G. W. Trucks, H. B. Schlegel, G. E. Scuseria, M. A. Robb, J. R. Cheeseman, G. Scalmani, V. Barone, B. Mennucci, G. A. Petersson, H. Nakatsuji, M. Caricato, X. Li, H. P. Hratchian, A. F. Izmaylov, J. Bloino, G. Zheng, J. L. Sonnenberg, M. Hada, M. Ehara, K. Toyota, R. Fukuda, J. Hasegawa, M. Ishida, T. Nakajima, Y. Honda, O. Kitao, H. Nakai, T. Vreven, J. A. Montgomery Jr., J. E. Peralta, F. Ogliaro, M. Bearpark, J. J. Heyd, E. Brothers, K. N. Kudin, V. N. Staroverov, R. Kobayashi, J. Normand, K. Raghavachari, A. Rendell, J. C. Burant, S. S. Iyengar, J. Tomasi, M. Cossi, N. Rega, J. M. Millam, M. Klene, J. E. Knox, J. B. Cross, V. Bakken, C. Adamo, J. Jaramillo, R. Gomperts, R. E. Stratmann, O. Yazyev, A. J. Austin, R. Cammi, C. Pomelli, J. W. Ochterski, R. L. Martin, K. Morokuma, V. G. Zakrzewski, G. A. Voth, P. Salvador, J. J. Dannenberg, S. Dapprich, A. D. Daniels, Ö. Farkas, J. B. Foresman, J. V. Ortiz, J. Cioslowski and D. J. Fox, Gaussian 09, revision D.01, 2013.

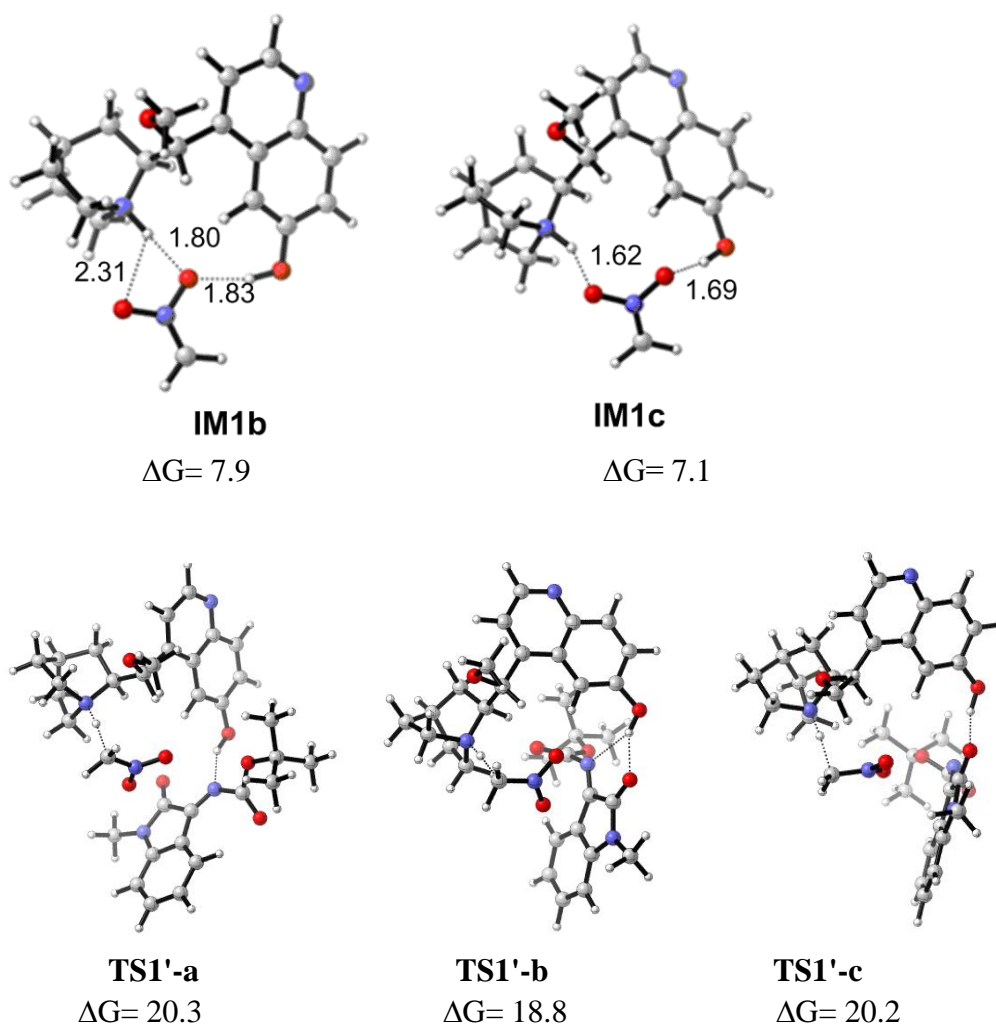

**Fig. S1.** The located less-stable conformations and the relative free energy for **IM1a** and **TS1'**.

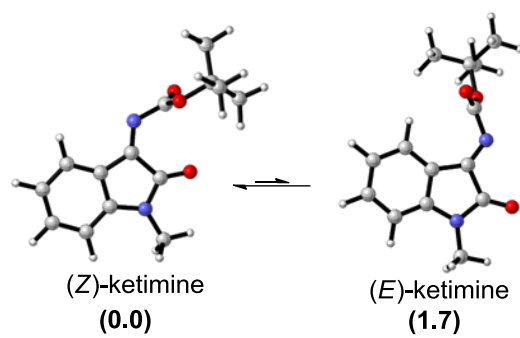

**Fig.S2** Two isomers of isatin-derived *N*-Boc ketimine (**1**) and the relative free energy with respect to the most stable *Z*-form.

**Table S1** The optimized structure of TS2s and their relative free energy with respect to the lowest-energy TS2 (**si-TS2a**) involving the Z-ketimine (Z-TS2s). See the main text for nomenclature of the transition states.

| nomenclature           | Normal                                                                              | Newman                                                                               | $\Delta\Delta G^\ddagger$ | D(NCCN) |
|------------------------|-------------------------------------------------------------------------------------|--------------------------------------------------------------------------------------|---------------------------|---------|
| <b>a'-N-gau1-syn-R</b> | 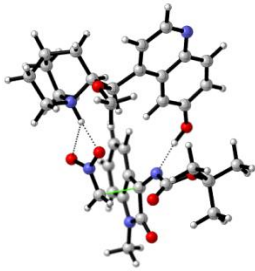   |    | 2.2                       | 66.1    |
| <b>a'-N-gau2-syn-R</b> |   |   | 10.8                      | -61.6   |
| <b>a'-N-anti-R</b>     | the same with<br><b>a'-N-gau1-syn-R</b>                                             |                                                                                      |                           |         |
| <b>a'-O-gau1-syn-R</b> | failed to locate                                                                    |                                                                                      |                           |         |
| <b>a'-O-gau2-syn-R</b> |  |  | 13.7                      | -53.8   |
| <b>a'-O-snti-R</b>     |  |  | 15.9                      | -176.5  |

|                        |                                                                                     |                                                                                      |      |       |
|------------------------|-------------------------------------------------------------------------------------|--------------------------------------------------------------------------------------|------|-------|
| <b>b'-N-gau1-syn-R</b> | 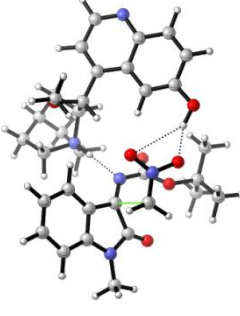   |    | 8.2  | 19.4  |
| <b>b'-N-gau2-syn-R</b> | failed to locate                                                                    |                                                                                      |      |       |
| <b>b'-N-snti-R</b>     | failed to locate                                                                    |                                                                                      |      |       |
| <b>b'-O-gau1-syn-R</b> | failed to locate                                                                    |                                                                                      |      |       |
| <b>b'-O-gau2-syn-R</b> | failed to locate                                                                    |                                                                                      |      |       |
| <b>b'-O-snti-R</b>     | failed to locate                                                                    |                                                                                      |      |       |
| <b>a'-N-gau1-syn-S</b> |   |   | 5.0  | -53.1 |
| <b>a'-N-gau2-syn-S</b> |  |  | 6.2  | 42.7  |
| <b>a'-N-anti-S</b>     | failed to locate                                                                    |                                                                                      |      |       |
| <b>a'-O-gau1-syn-S</b> | failed to locate                                                                    |                                                                                      |      |       |
| <b>a'-O-gau2-syn-S</b> |  |  | 12.5 | 74.4  |



|                        |                                                                                     |                                                                                      |      |       |
|------------------------|-------------------------------------------------------------------------------------|--------------------------------------------------------------------------------------|------|-------|
| <b>a'-O-anti-S</b>     | 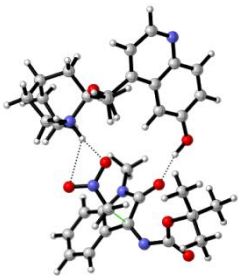   |    | 12.4 | 172.3 |
| <b>b'-N-gau1-syn-S</b> |    |    | 6.0  | -66.7 |
| <b>b'-N-gau2-syn-S</b> |   |   | 16.2 | 20.7  |
| <b>b'-N-anti-S</b>     | failed to locate                                                                    |                                                                                      |      |       |
| <b>b'-O-gau1-syn-S</b> | failed to locate                                                                    |                                                                                      |      |       |
| <b>b'-O-gau2-syn-S</b> | the same with <b>b'-O-anti-S</b>                                                    |                                                                                      |      |       |
| <b>b'-O-anti-S</b>     |  |  | 4.9  | 148.7 |

**Table S2.** The optimized structure and relative free energy of the C-C formation transition states (**TS2**) involved in the mode **a** for *E*-ketimine. See the main text for nomenclature of the transition states.

| nomenclature                        | Normal View                                                                         | Newman projection                                                                    | $\Delta\Delta G^\ddagger$<br>(kcal/mol) | $D_{(NCCN)}$<br>(degree) |
|-------------------------------------|-------------------------------------------------------------------------------------|--------------------------------------------------------------------------------------|-----------------------------------------|--------------------------|
| <b>a-N-gau1-syn-S</b><br>(si-TS2a)  | 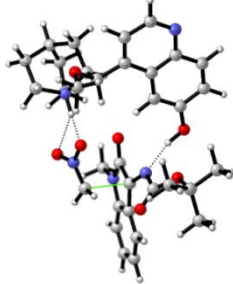   |    | <b>0.0</b>                              | <b>75.2</b>              |
| <b>a-N-gau1-anti-S</b><br>(si-TS2c) |   |   | <b>1.0</b>                              | <b>58.5</b>              |
| <b>a-O-gau1-syn-S</b>               |  |  | <b>6.9</b>                              | <b>53.3</b>              |
| <b>a-O-gau1-anti-S</b>              | <i>the same with a-N-gau1-anti-S</i>                                                |                                                                                      |                                         |                          |
| <b>a-N-gau2-syn-S</b>               |  |  | <b>8.5</b>                              | <b>-47.9</b>             |
| <b>a-N-gau2-anti-S</b>              | <i>the same with a-N-gau2-syn-S</i>                                                 |                                                                                      |                                         |                          |

|                                                                               |                                                                                     |                                                                                      |            |              |
|-------------------------------------------------------------------------------|-------------------------------------------------------------------------------------|--------------------------------------------------------------------------------------|------------|--------------|
| <b>a-O-gau2-syn-S</b><br>(a structure with only ketimine binding to catalyst) | 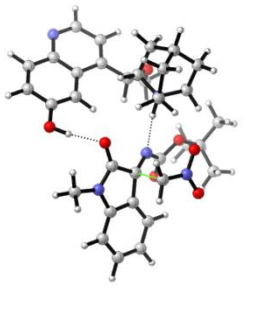   |    | <b>7.9</b> | <b>-36.4</b> |
| <b>a-O-gau2-anti-S</b>                                                        | <i>the same with a-O-gau1-syn-S</i>                                                 |                                                                                      |            |              |
| <b>a-N-anti-S</b>                                                             | <i>the same with a-N-gau1-anti-S</i>                                                |                                                                                      |            |              |
| <b>a-O-anti-S</b>                                                             | <i>the same with a-N-gau1-anti-S</i>                                                |                                                                                      |            |              |
| <b>a-N-gau1-syn-R</b>                                                         |   |   | <b>2.1</b> | <b>-49.2</b> |
| <b>a-N-gau1-syn-R-Boc-rotator</b>                                             |  |  | <b>4.2</b> | <b>-45.4</b> |
| <b>a-N-gau1-anti-R</b>                                                        |  |  | <b>3.3</b> | <b>-45.3</b> |
| <b>a-O-gau1-syn-R</b>                                                         |  |  | <b>4.0</b> | <b>-49.7</b> |

|                        |                                                                                     |                                                                                      |             |               |
|------------------------|-------------------------------------------------------------------------------------|--------------------------------------------------------------------------------------|-------------|---------------|
| <b>a-O-gau1-anti-R</b> | 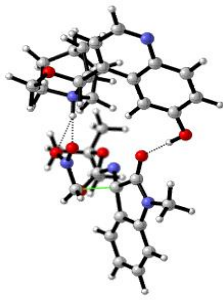   |    | <b>6.5</b>  | <b>-35.2</b>  |
| <b>a-N-gau2-syn-R</b>  |    |    | <b>5.1</b>  | <b>48.1</b>   |
| <b>a-N-gau2-anti-R</b> | <i>the same with a-N-gau1-syn-R</i>                                                 |                                                                                      |             |               |
| <b>a-O-gau2-syn-R</b>  | <i>the same with a-N-gau2-syn-R</i>                                                 |                                                                                      |             |               |
| <b>a-O-gau2-anti-R</b> | <i>the same with a-O-anti-R</i>                                                     |                                                                                      |             |               |
| <b>a-N-anti-R</b>      | failed to locate                                                                    |                                                                                      |             |               |
| <b>a-O-anti-R-1</b>    |  |  | <b>10.6</b> | <b>-158.0</b> |
| <b>a-O-anti-R-2</b>    |  |  | <b>11.2</b> | <b>-162.5</b> |

|                           | <b>Normal</b>                                                                       | <b>Newman project</b>                                                                | $\Delta\Delta G$ | $D_{(NCCN)}$<br>(degree) |
|---------------------------|-------------------------------------------------------------------------------------|--------------------------------------------------------------------------------------|------------------|--------------------------|
| <b>TS2-a-Boc-O-gau1-R</b> | 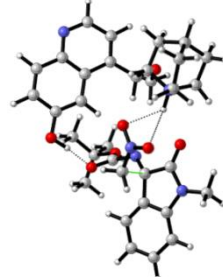 |  | <b>4.6</b>       | <b>-72.1</b>             |

|                    |                                                                                     |                                                                                      |     |        |
|--------------------|-------------------------------------------------------------------------------------|--------------------------------------------------------------------------------------|-----|--------|
| TS2-a-Boc-O-gau2-R | <i>the same with TS2-a-Boc-O-anti-R</i>                                             |                                                                                      |     |        |
| TS2-a-Boc-O-anti-R | 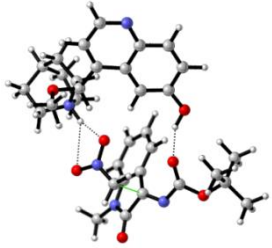   |    | 9.2 | 151.8  |
| TS2-a-Boc-O-gau1-S |    |    | 5.4 | 51.0   |
| TS2-a-Boc-O-gau2-S |   |   | 8.5 | -54.7  |
| TS2-a-Boc-O-anti-S |  |  | 9.5 | -152.9 |

**Table S3.** The optimized structure and relative free energy of transition states involved in the mode **b** for *E*-ketimine. See the main text for nomenclature of the transition states.

| nomenclature           | Normal View                                                                         | Newman projection                                                                    | $\Delta\Delta G^\ddagger$<br>(kcal/mol) | $D_{(NCCN)}$<br>(degree) |
|------------------------|-------------------------------------------------------------------------------------|--------------------------------------------------------------------------------------|-----------------------------------------|--------------------------|
| <b>b-N-gau1-syn-S</b>  | <i>the same with b-O-anti-S</i>                                                     |                                                                                      |                                         |                          |
| <b>b-N-gau1-anti-S</b> | 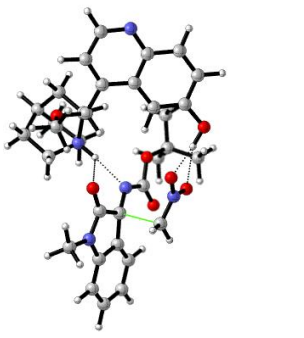   |    | <b>6.5</b>                              | <b>11.0</b>              |
| <b>b-O-gau1-anti-S</b> |   |   | <b>0.3</b>                              | <b>82.2</b>              |
| <b>b-O-gau1-syn-S</b>  |  |  | <b>4.9</b>                              | <b>28.6</b>              |
| <b>b-N-gau2-syn-S</b>  |  |  | <b>6.8</b>                              | <b>-44.9</b>             |
| <b>b-N-gau2-anti-S</b> | <i>the same with b-O-gau1-syn-S</i>                                                 |                                                                                      |                                         |                          |
| <b>b-O-gau2-syn-S</b>  | <i>the same with b-N-gau2-syn-S</i>                                                 |                                                                                      |                                         |                          |

|                                      |                                                                                     |                                                                                      |            |              |
|--------------------------------------|-------------------------------------------------------------------------------------|--------------------------------------------------------------------------------------|------------|--------------|
| <b>b-O-gau2-anti-S</b>               | <b>fail to located</b>                                                              |                                                                                      |            |              |
| <b>b-N-anti-S</b>                    | <i>the same with b-O-anti-S</i>                                                     |                                                                                      |            |              |
| <b>b-O-anti-S</b>                    | 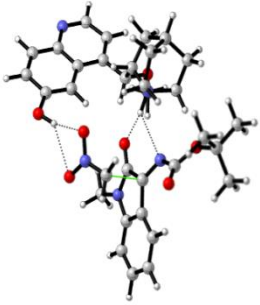   |    | <b>2.8</b> | <b>108.0</b> |
| <b>b-N-gau1-syn-R</b>                | <i>the same with b-O-anti-R</i>                                                     |                                                                                      |            |              |
| <b>b-N-gau1-anti-R<br/>(re-ts2b)</b> |    |    | <b>2.3</b> | <b>-82.8</b> |
| <b>b-O-gau1-syn-R</b>                |  |  | <b>2.6</b> | <b>-65.5</b> |
| <b>b-O-gau1-anti-R</b>               |  |  | <b>9.0</b> | <b>-43.9</b> |
| <b>b-N-gau2-syn-R</b>                |  |  | <b>7.7</b> | <b>42.0</b>  |

|                        |                                                                                   |                                                                                    |     |        |
|------------------------|-----------------------------------------------------------------------------------|------------------------------------------------------------------------------------|-----|--------|
| <b>b-N-gau2-anti-R</b> | <i>the same with b-O-gau1-syn-R</i>                                               |                                                                                    |     |        |
| <b>b-O-gau2-syn-R</b>  | <i>the same with b-N-gau2-syn-R</i>                                               |                                                                                    |     |        |
| <b>b-O-gau2-anti-R</b> | <i>the same with b-O-gau1-syn-R</i>                                               |                                                                                    |     |        |
| <b>b-N-anti-R</b>      | <i>the same with b-O-anti-R</i>                                                   |                                                                                    |     |        |
| <b>b-O- anti-R</b>     | 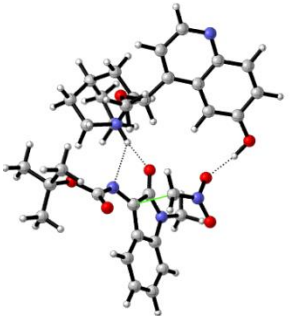 |  | 6.3 | -148.9 |

|                           | Normal                                                                              | Newman project                                                                       | $\Delta\Delta G$ | D(N-C-C-N) |
|---------------------------|-------------------------------------------------------------------------------------|--------------------------------------------------------------------------------------|------------------|------------|
| <b>TS2-b-Boc-O-gau1-R</b> | <i>the same with TS2-c-gau1-OS-R</i>                                                |                                                                                      |                  |            |
| <b>TS2-b-Boc-O-gau2-R</b> | <i>the same with TS2-a-N-gau2-syn-R</i>                                             |                                                                                      |                  |            |
| <b>TS2-b-Boc-O-anti-R</b> | 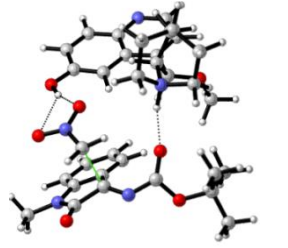 |  | 16.9             | 154.3      |
| <b>TS2-b-Boc-O-gau1-S</b> |  |  | 7.8              | 20.4       |
| <b>TS2-b-Boc-O-gau2-S</b> |  |  | 6.3              | -61.0      |



|                           |                                                                                   |                                                                                    |      |        |
|---------------------------|-----------------------------------------------------------------------------------|------------------------------------------------------------------------------------|------|--------|
| <b>TS2-b-Boc-O-anti-S</b> | 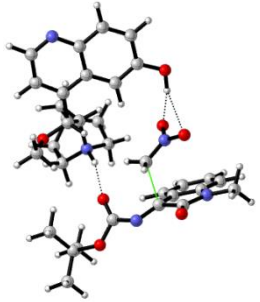 |  | 13.1 | -174.8 |
|---------------------------|-----------------------------------------------------------------------------------|------------------------------------------------------------------------------------|------|--------|

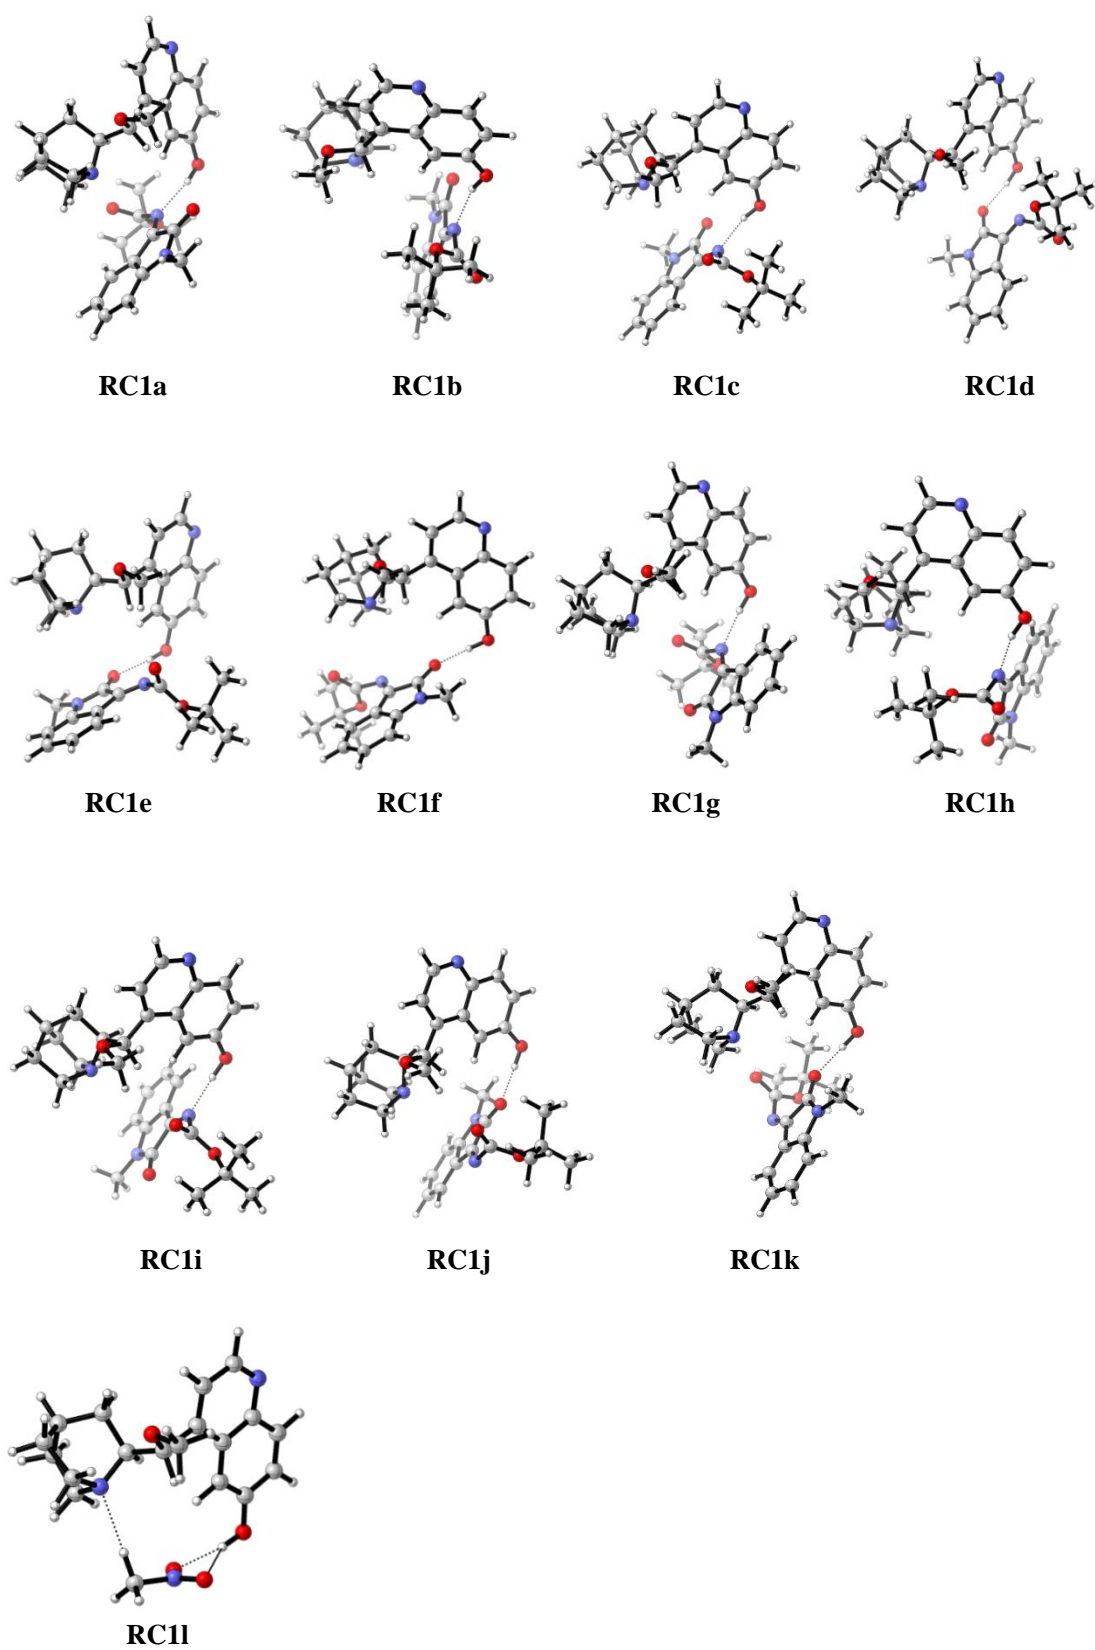

**Fig.S3** The structure and relative energy of the possible complex of catalyst with substrates.

**Table S4** The relative energy, enthalpy and free energy (in kcal/mol) of the possible complex of catalyst with substrates.

| <b>RC1</b>  |                                            | <b>Distance of the key HB</b> | <b>ΔE</b> | <b>ΔH</b> | <b>ΔG</b>   |
|-------------|--------------------------------------------|-------------------------------|-----------|-----------|-------------|
| <b>RC1a</b> | cata- <i>E</i> -imine -N-com1              | 1.99                          | -11.6     | -12.2     | -0.1        |
| <b>RC1b</b> | cata- <i>E</i> -imine -N-com2              | 1.99                          | -10.8     | -11.4     | 0.6         |
| <b>RC1c</b> | cata- <i>E</i> -imine -N-com2-Boc-rotator  | 2.07                          | -11.6     | -12.2     | -1.4        |
| <b>RC1d</b> | cata- <i>E</i> -imine-O-com1               | 1.87                          | -11.8     | -12.4     | <b>-1.8</b> |
| <b>RC1e</b> | cata- <i>E</i> -imine-O-com1-Boc-rotator   | 1.86                          | -12.5     | -13.1     | -1.2        |
| <b>RC1f</b> | cata- <i>E</i> -imine-O-com2               | 1.81                          | -9.5      | -10.1     | 0.7         |
|             |                                            |                               |           |           |             |
| <b>RC1g</b> | cata- <i>Z</i> -imine -N-com1              | 1.91                          | -10.0     | -10.6     | <b>0.3</b>  |
| <b>RC1h</b> | cata- <i>Z</i> -imine -N-com2              | 1.93                          | -10.0     | -10.6     | 2.3         |
| <b>RC1i</b> | cata- <i>Z</i> -imine -N-com2-Boc-rotator  | 1.92                          | -10.5     | -11.1     | 1.2         |
| <b>RC1j</b> | cata- <i>Z</i> -imine -O-com1              | 1.81                          | -11.1     | -11.7     | 2.0         |
| <b>RC1k</b> | cata- <i>Z</i> -imine -O-com2              | 1.81                          | -8.8      | -9.4      | 2.5         |
|             |                                            |                               |           |           |             |
| <b>RC1l</b> | cata-CH <sub>3</sub> NO <sub>2</sub> -com1 | 1.93                          | -8.2      | -8.8      | 3.3         |

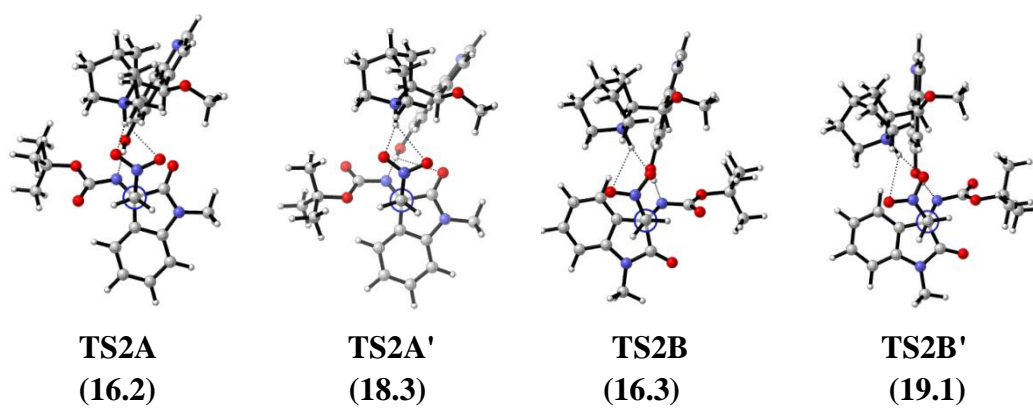

**Fig. S4** Comparison of two couples of transition states with different orient of Boc group. Values in parathesis are the relative Gibbs free energy (kcal/mol).

**Table S5** The optimized structure and relative free energy of transition states involved in the mode **c** for *E*-ketimine. See the main text for nomenclature of the transition states.

| nomenclature    | Normal View                                                                         | Newman projection                                                                    | $\Delta\Delta G^\ddagger$<br>(kcal/mol) | $D_{(NCCN)}$<br>(degree) |
|-----------------|-------------------------------------------------------------------------------------|--------------------------------------------------------------------------------------|-----------------------------------------|--------------------------|
| TS2-c-gau1-OS-R | 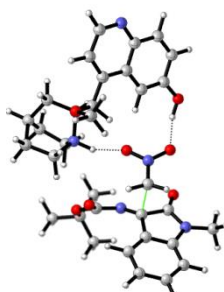   |    | 10.0                                    | -52.3                    |
| TS2-c-gau1-SS-R | <i>the same with TS2-b-O-gau1-syn-R</i>                                             |                                                                                      |                                         |                          |
| TS2-c-gau2-OS-R |   |   | 14.0                                    | 59.3                     |
| TS2-c-gau2-SS-R | <i>the same with TS2-a-Boc-O-anti-R</i>                                             |                                                                                      |                                         |                          |
| TS2-c-anti-OS-R |  |  | 13.7                                    | 175.8                    |
| TS2-c-anti-SS-R | <i>the same with TS2-a-O-anti-R</i>                                                 |                                                                                      |                                         |                          |
| TS2-c-gau1-OS-S | <i>the same with TS2-b-N-gau1-syn-S</i>                                             |                                                                                      |                                         |                          |
| TS2-c-gau1-SS-S | <i>the same with TS2-b-N-gau1-anti-S</i>                                            |                                                                                      |                                         |                          |

|                        |                                                                                    |                                                                                     |      |        |
|------------------------|------------------------------------------------------------------------------------|-------------------------------------------------------------------------------------|------|--------|
| <b>TS2-c-gau2-OS-S</b> | 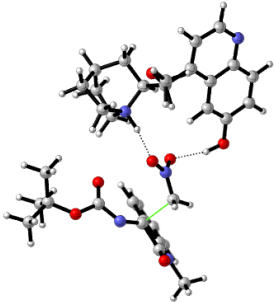  |   | 13.0 | -65.2  |
| <b>TS2-c-gau2-SS-S</b> | <i>the same with TS2-a-N-gau2-syn-S</i>                                            |                                                                                     |      |        |
| <b>TS2-c-anti-OS-S</b> |   |   | 11.5 | -173.7 |
| <b>TS2-c-anti-SS-S</b> |  |  | 12.6 | -171.5 |

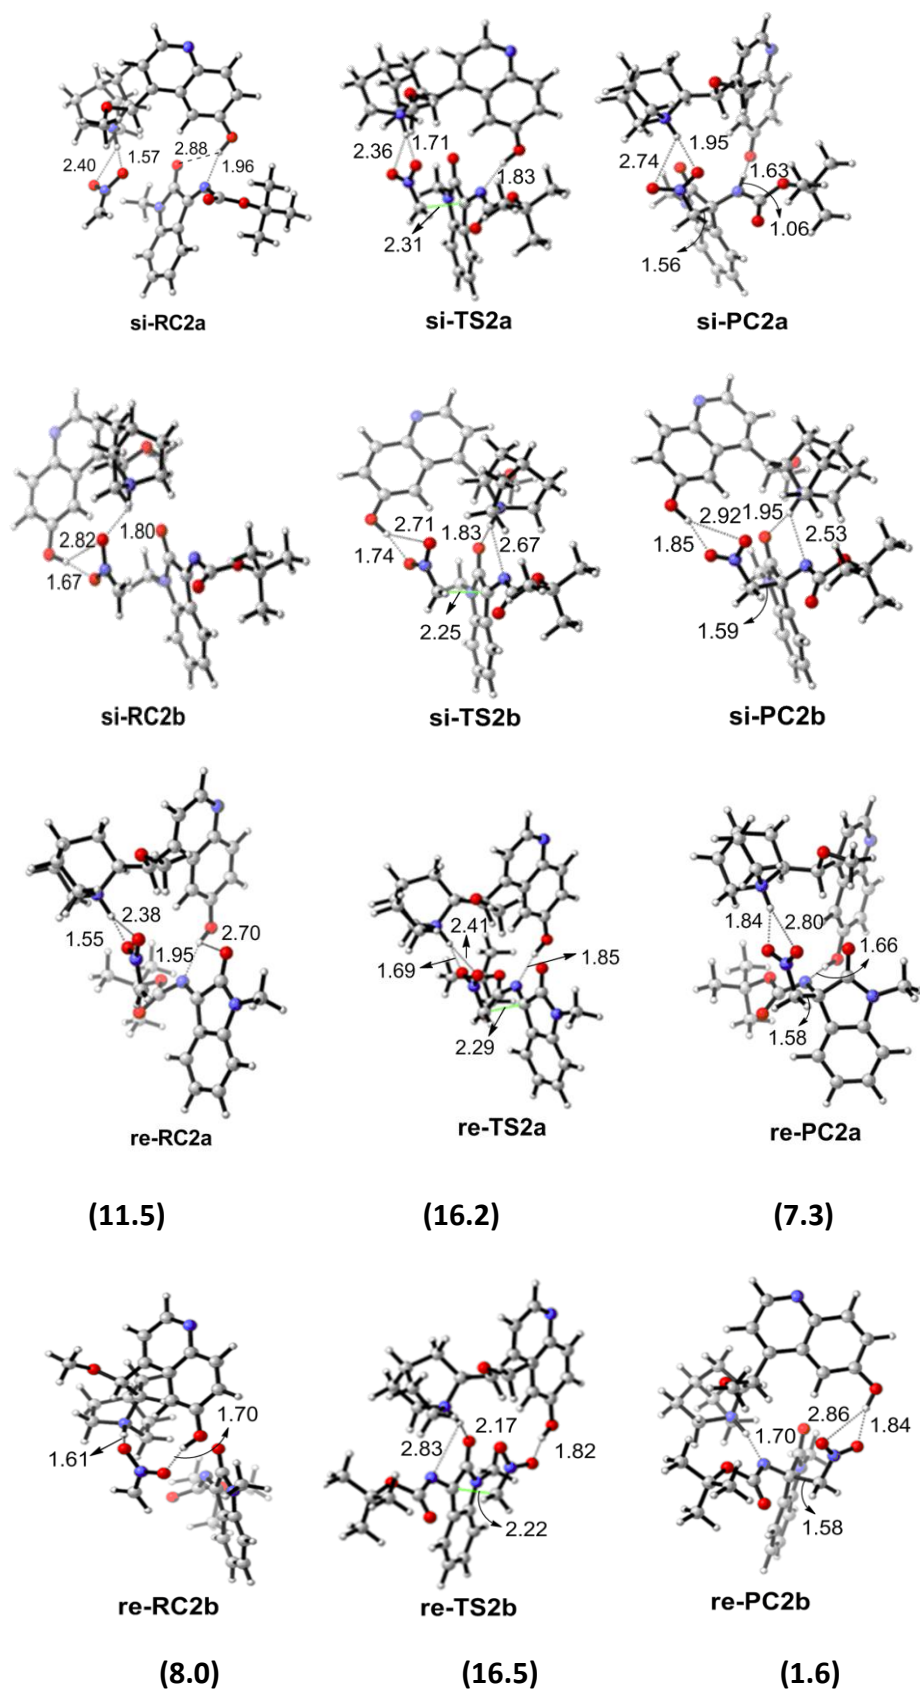

**Fig. S5** Optimized structure and relative free energy (in kcal/mol) of the stationary points for the C-C bond forming step leading to the *S*- and *R*-products in modes **a** and **b**. Bond distances are given in angstroms.

**Table S6.** NBO analysis of the lowest-energy transition states leading to the *S*-product for mode **a** and **b**.

| Donor | Acceptor      | $\Delta E_{\text{NBO}}$ (kcal/mol) |                |
|-------|---------------|------------------------------------|----------------|
|       |               | <i>si-TS2a</i>                     | <i>si-TS2b</i> |
| LP O1 | BD*N-H1(O-H2) | 36.21                              | 0.35           |
| LP O2 | BD*N-H1(O-H2) | 1.84                               | 30.52          |
| LP O3 | BD*O-H2(N-H1) | 0.11                               | 22.07          |
| LP N1 | BD*O-H2(N-H1) | 23.32                              | 1.13           |

**Scheme S1.** Distortion/interaction analysis of the studied reaction.

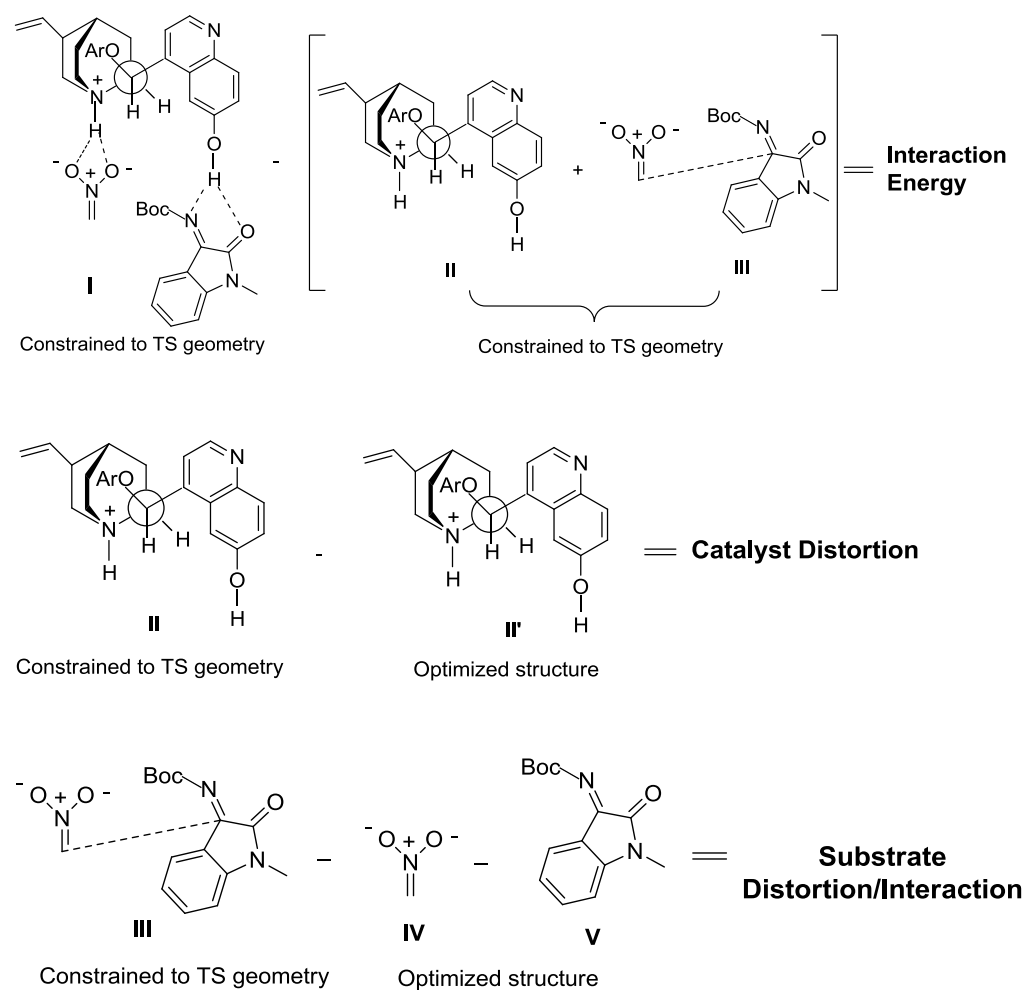



**Table S7** Distortion/interaction analysis of the five lowest energy transition states using the model catalyst at the SMD-D3-B3LYP-6311++G(d,p)// SMD-B3LYP-631G(d) level.

|                              | <i>si-TS2a</i> | <i>si-TS2b</i> | <i>re-TS2a</i> | <i>si-TS2c</i> | <i>re-TS2b</i> | $\Delta\Delta E_1$ | $\Delta\Delta E_2$ | $\Delta\Delta E_3$ | $\Delta\Delta E_4$ |
|------------------------------|----------------|----------------|----------------|----------------|----------------|--------------------|--------------------|--------------------|--------------------|
| $\Delta E_{\text{int}}$      | -71            | -71.7          | -69.2          | -71.4          | -70.3          | 0.7                | 1.8                | 0.4                | 1.2                |
| $\Delta E_{\text{dist}}$     | 1.7            | 1.2            | 2.3            | 2.2            | 2.3            | 0.5                | 0.5                | -0.5               | 0.0                |
| $\Delta E_{\text{int/dist}}$ | -5.3           | -5.4           | -5.4           | -5.0           | -4.7           | 0.1                | -0.1               | -0.3               | -0.7               |
| <b>total</b>                 | -74.5          | -75.8          | -72.3          | -74.2          | -72.7          | 1.3                | 2.2                | -0.3               | 0.5                |

$\Delta\Delta E_1 = \Delta E(\text{si-TS2a}) - \Delta E(\text{si-TS2b})$ ;  $\Delta\Delta E_2 = \Delta E(\text{re-TS2a}) - \Delta E(\text{si-TS2a})$ ;  $\Delta\Delta E_3 = \Delta E(\text{si-TS2a}) - \Delta E(\text{si-TS2c})$ ;  $\Delta\Delta E_4 = \Delta E(\text{re-TS2a}) - \Delta E(\text{re-TS2b})$

**Table S8.** Comparison of the relative free energy of the lowest energy TSs leading to S-product in modes **a** and **b** at different level of theory.

| method                                  | $\Delta G^\ddagger$ |                | $\Delta\Delta G^\ddagger$ |
|-----------------------------------------|---------------------|----------------|---------------------------|
|                                         | <b>si-TS2a</b>      | <b>si-TS2b</b> |                           |
| SMD-D3-B3LYP-6311++G**//SMD-B3LYP-631G* | 14.1                | 14.4           | 0.3                       |
| SMD-B3LYP-6311++G**//SMD-B3LYP-631G*    | 36.0                | 37.5           | 1.5                       |

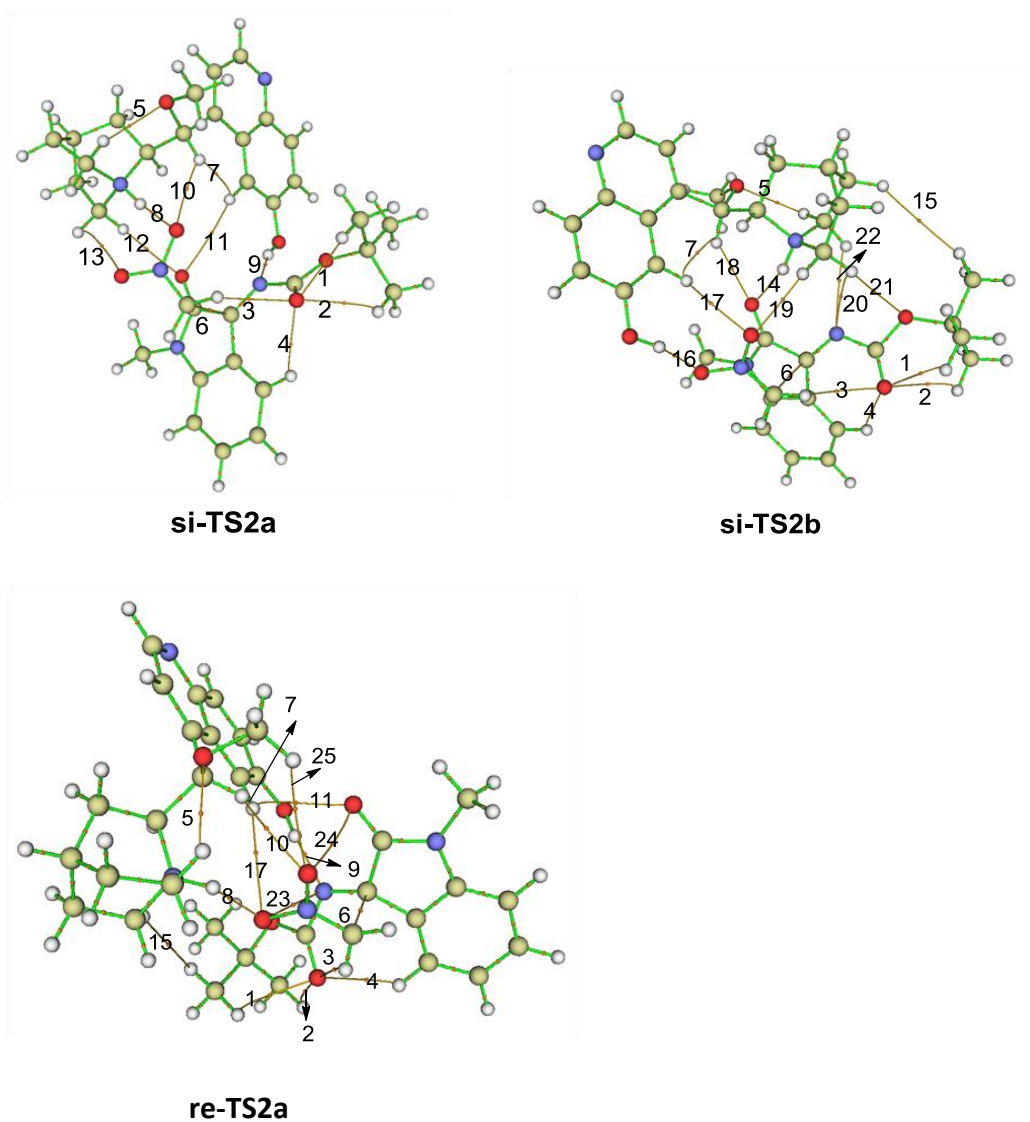

**Fig.S6** AIM plots depicting bond critical points (BCPs) along the bond paths in the transition states of **si-TS2a**, **si-TS2b** and **re-TS2a**.

**Table S9.** Summary of electron densities at the bond critical points (BCPs) along the bond paths, type and distance of interactions in **si-TS2a**, **si-TS2b** and **re-TS2a**.

| Bond path | Type of Interaction | Distance (Å) |         |         | $\rho_{bcp} * 10^{-2}$ (in a.u) |               |               |
|-----------|---------------------|--------------|---------|---------|---------------------------------|---------------|---------------|
|           |                     | si-TS2a      | si-TS2b | re-TS2a | si-TS2a                         | si-TS2b       | re-TS2a       |
| 1         | CH...O              | 2.45         | 2.42    | 2.42    | 1.2140                          | 1.2968        | 1.2943        |
| 2         | CH...O              | 2.44         | 2.42    | 2.44    | 1.2645                          | 1.2873        | 1.2392        |
| 3         | CH...O              | 2.39         | 2.61    | 2.49    | 1.1970                          | 0.7799        | 0.9801        |
| 4         | CH...O              | 2.34         | 2.29    | 2.25    | 1.3328                          | 1.4759        | 1.6018        |
| 5         | CH...O              | 2.3          | 2.31    | 2.32    | 1.5395                          | 1.5221        | 1.5115        |
| 6         | C-C formation       | 2.31         | 2.25    | 2.29    | 4.7027                          | 5.3797        | 4.8962        |
| 7         | CH...HC             | 2.11         | 2.13    | 2.06    | 1.0398                          | 1.0211        | 1.1076        |
| 8         | NH...O              | 1.71         | -       | 1.69    | 4.8320                          | <i>No bcp</i> | 5.1033        |
| 9         | OH...N              | 1.83         | -       | 1.85    | 3.9520                          | <i>No bcp</i> | 3.7411        |
| 10        | CH...O              | 2.47         | -       | 2.61    | 0.8869                          | <i>No bcp</i> | 0.7884        |
| 11        | CH...O              | 2.99         | -       | 2.64    | 0.3289                          | <i>No bcp</i> | 0.7604        |
| 12        | CH...O              | 2.46         | -       | -       | 0.8883                          | <i>No bcp</i> | <i>No bcp</i> |
| 13        | CH...O              | 2.58         | -       | -       | 0.9168                          | <i>No bcp</i> | <i>No bcp</i> |
| 14        | NH...O              | -            | 1.83    | -       | <i>No bcp</i>                   | 3.5228        | <i>No bcp</i> |
| 15        | CH...HC             | -            | 3.11    | 4.27    | <i>No bcp</i>                   | 0.1046        | 0.0608        |
| 16        | OH...O              | -            | 1.74    | -       | <i>No bcp</i>                   | 4.2578        | <i>No bcp</i> |
| 17        | CH...O              | -            | 2.72    | 3.13    | <i>No bcp</i>                   | 0.6035        | 0.2346        |
| 18        | CH...O              | -            | 2.29    | -       | <i>No bcp</i>                   | 1.301         | <i>No bcp</i> |
| 19        | CH...O              | -            | 2.34    | -       | <i>No bcp</i>                   | 1.1581        | <i>No bcp</i> |
| 20        | CH...N              | -            | 2.67    | -       | <i>No bcp</i>                   | 0.8222        | <i>No bcp</i> |
| 21        | CH...O              | -            | 2.6     | -       | <i>No bcp</i>                   | 0.7325        | <i>No bcp</i> |
| 22        | CH...N              | -            | 2.79    | -       | <i>No bcp</i>                   | 0.6734        | <i>No bcp</i> |
| 23        | anion(O)... $\pi$   | -            | -       | 3.01    | <i>No bcp</i>                   | <i>No bcp</i> | 0.9533        |
| 24        | anion(O)... $\pi$   | -            | -       | 3.14    | <i>No bcp</i>                   | <i>No bcp</i> | 0.6099        |
| 25        | CH...O              | -            | -       | 2.81    | <i>No bcp</i>                   | <i>No bcp</i> | 0.4228        |

**Table S10.** Comparison of the relative free energy and their difference for the lowest energy stereocontrol TSs at different level of theory.

| method                                    | $\Delta G^\ddagger$ |                 | $\Delta\Delta G^\ddagger$ | ee<br>% |
|-------------------------------------------|---------------------|-----------------|---------------------------|---------|
|                                           | <i>re</i> -TS2a     | <i>si</i> -TS2a |                           |         |
| SMD-D3-B3LYP-6311++G**//SMD-B3LYP-631G*   | 16.2                | 14.1            | 2.1                       | 94      |
| SMD-M06-2X-6311++G**//SMD-M06-2X-631G*    | 20.2                | 18.0            | 2.2                       | 95      |
| SMD-D3-B3LYP-6311++G**//SMD-B3LYP-631+G** | 17.0                | 14.4            | 2.6                       | 97      |
| SMD-M06-2X-6311++G**//SMD-B3LYP-631G*     | 21.4                | 19.9            | 1.5                       | 85      |
| SMD-wB97xd-6311++G**//SMD-B3LYP-631G*     | 21.7                | 19.8            | 1.9                       | 92      |
| SMD-B3LYP-6311++G**//SMD-B3LYP-631G*      | 37.4                | 36.0            | 1.4                       | 83      |
| SMD-D3-B3LYP-def2-TZVPP//SMD-B3LYP-631G*  | 19.3                | 17.2            | 2.1                       | 94      |

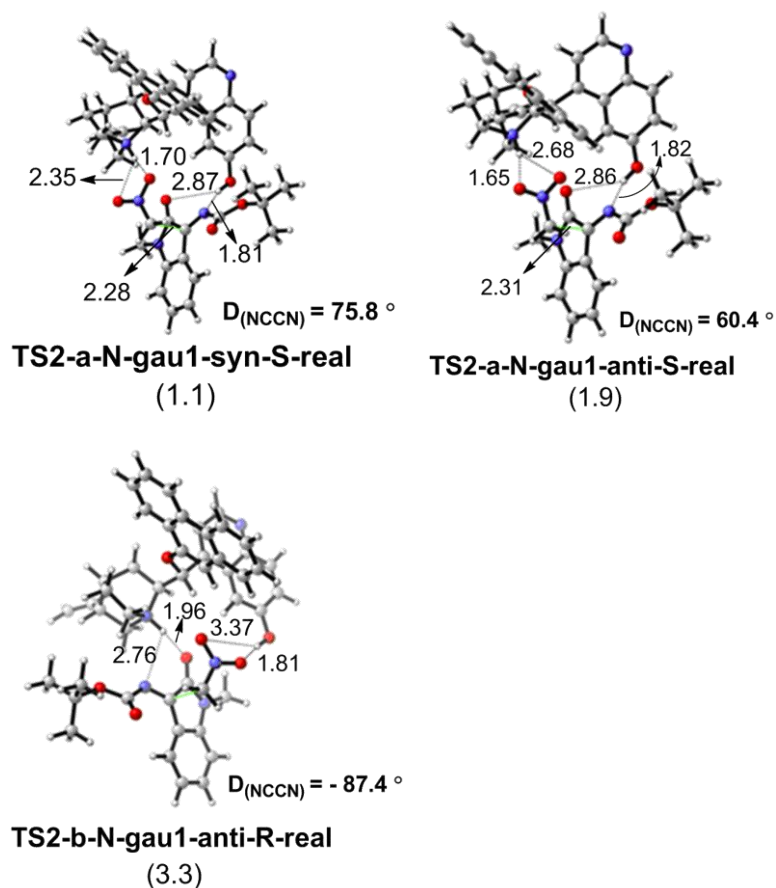

**Fig. S7** Optimized structure and relative free energy of the three less stable TS2s involving the real catalyst in modes **a** and **b**. Bond distances are given in angstroms.

**Table S11** Distortion/interaction analysis of *si-TS2b-real* and *re-TS2a-real* at the SMD-D3-B3LYP-6311++G(d,p)// SMD- B3LYP-631G(d) level.

|                              | <i>si-TS2b-real</i> | <i>re-TS2a-real</i> | $\Delta\Delta E(\text{si-re})$ |
|------------------------------|---------------------|---------------------|--------------------------------|
| $\Delta E_{\text{int}}$      | -74.17              | -71.3               | -2.87                          |
| $\Delta E_{\text{dist}}$     | 1.37                | 2.66                | -1.28                          |
| $\Delta E_{\text{int/dist}}$ | -5.06               | -5.38               | 0.32                           |
| <b>total</b>                 | <b>-77.87</b>       | <b>-74.03</b>       | <b>-3.84</b>                   |

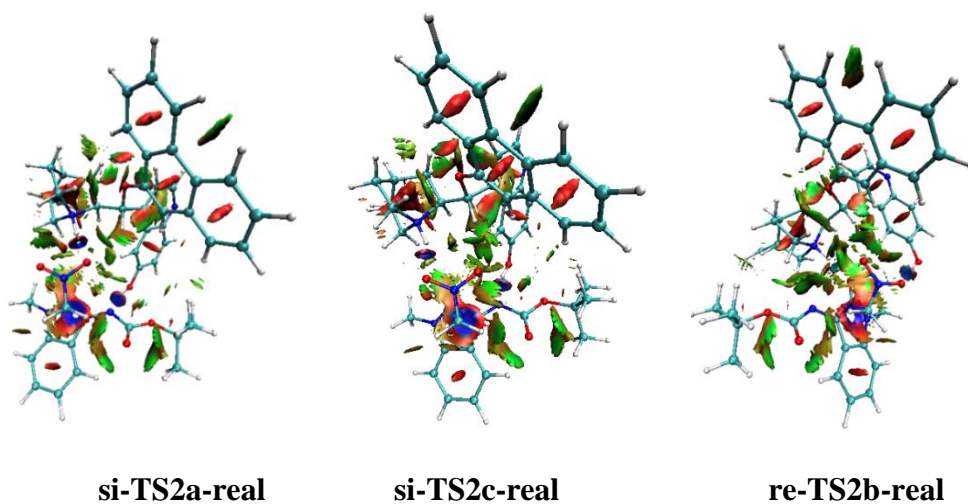

**Fig. S8.** NCI plots of the other three lowest-energy transition states involving the real catalyst. Strong and attractive interactions are blue, weak attractive interactions are green, and strong and repulsive interactions are red.

**Table S12.** AIM analysis for **re-TS2a-real**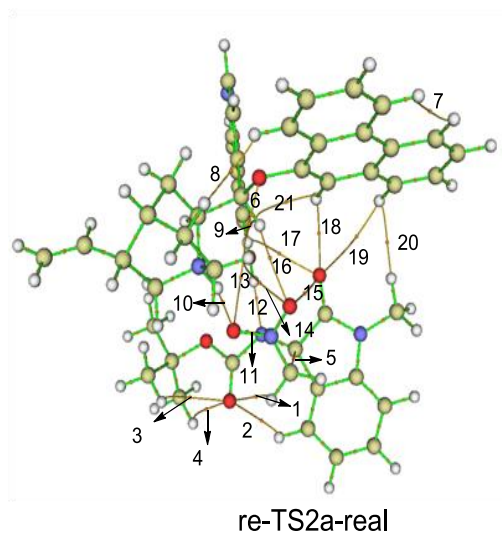

| Bond path | Type of Interaction      | Distance (in Å) | $\rho_{\text{bcp}} * 10^{-2}$ (in a.u.) |
|-----------|--------------------------|-----------------|-----------------------------------------|
| 1         | CH...O                   | 2.52            | 0.9297                                  |
| 2         | CH...O                   | 2.24            | 1.5863                                  |
| 3         | CH...O                   | 2.42            | 1.2930                                  |
| 4         | CH...O                   | 2.44            | 1.2418                                  |
| 5         | C-C formation            | 2.28            | 4.9282                                  |
| 6         | CH...O                   | 2.44            | 1.1921                                  |
| 7         | CH...HC                  | 2.00            | 1.2392                                  |
| 8         | CH...HC                  | 2.35            | 0.4842                                  |
| 9         | CH...HC                  | 2.08            | 1.1237                                  |
| 10        | NH...O                   | 1.67            | 5.2458                                  |
| 11        | anion (O)... $\pi$ (C=N) | 3.00            | 0.9562                                  |
| 12        | OH...N                   | 1.83            | 3.8799                                  |
| 13        | CH...O                   | 3.08            | 0.2769                                  |
| 14        | CH...O                   | 2.77            | 0.6407                                  |
| 15        | anion(O)... $\pi$ (C=O)  | 3.15            | 0.6209                                  |
| 16        | CH...O                   | 2.56            | 0.8354                                  |
| 17        | CH...O                   | 2.71            | 0.6769                                  |
| 18        | CH...O                   | 2.97            | 0.2748                                  |
| 19        | CH...O                   | 3.15            | 0.2422                                  |
| 20        | CH...HC                  | 2.48            | 0.3700                                  |
| 21        | CH...HC                  | 2.04            | 1.3726                                  |

**Table S13.** AIM analysis for **si-TS2b-real**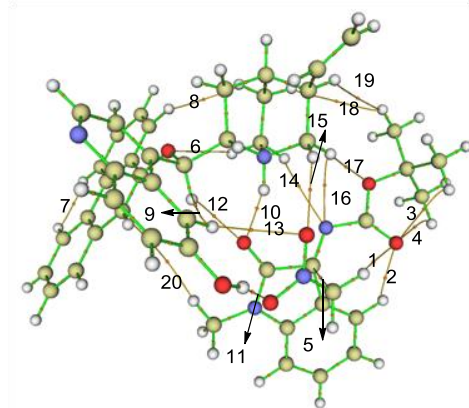**si-TS2b-real**

| Bond path | Type of Interaction               | Distance (in Å) | $\rho_{\text{bcp}} * 10^{-2}$ (in a.u.) |
|-----------|-----------------------------------|-----------------|-----------------------------------------|
| 1         | CH...O                            | 2.59            | 0.8078                                  |
| 2         | CH...O                            | 2.29            | 1.4207                                  |
| 3         | CH...O                            | 2.41            | 1.3067                                  |
| 4         | CH...O                            | 2.43            | 1.2652                                  |
| 5         | C-C formation                     | 2.27            | 4.9996                                  |
| 6         | CH...O                            | 2.39            | 1.2731                                  |
| 7         | CH...HC( $\sigma \cdots \sigma$ ) | 2.00            | 1.2477                                  |
| 8         | CH...HC( $\sigma \cdots \sigma$ ) | 2.56            | 0.3191                                  |
| 9         | CH...HC( $\sigma \cdots \sigma$ ) | 2.12            | 1.1060                                  |
| 10        | NH...O                            | 1.81            | 3.5716                                  |
| 11        | OH...O                            | 1.73            | 4.1996                                  |
| 12        | CH...O                            | 2.30            | 1.2089                                  |
| 13        | CH...O                            | 2.72            | 0.6282                                  |
| 14        | CH...N                            | 2.76            | 0.7226                                  |
| 15        | CH...O                            | 2.39            | 1.0187                                  |
| 16        | CH...N                            | 2.63            | 0.8910                                  |
| 17        | CH...O                            | 2.58            | 0.7456                                  |
| 18        | CH...HC( $\sigma \cdots \sigma$ ) | 3.21            | 0.0918                                  |
| 19        | CH...HC( $\sigma \cdots \sigma$ ) | 3.18            | 0.0926                                  |
| 20        | CH...HC( $\sigma \cdots \sigma$ ) | 3.27            | 0.1106                                  |

**Table S14.** Comparison of the relative free energy of the lowest energy TSs **si-TS2b-real** and **re-TS2a-real** at different level of theory.

| method                                      | $\Delta G^\ddagger$ (kcal/mol) |                     | $\Delta\Delta G^\ddagger$<br>(kcal/mol) | ee<br>(%) |
|---------------------------------------------|--------------------------------|---------------------|-----------------------------------------|-----------|
|                                             | <b>si-TS2b-real</b>            | <b>re-TS2a-real</b> |                                         |           |
| SMD-D3-B3LYP-6311++G**//<br>SMD-B3LYP-631G* | 15.7                           | 17.9                | 2.2                                     | 95        |
| SMD-B3LYP-6311++G**//<br>SMD-B3LYP-631G*    | 40.3                           | 41.2                | 0.9                                     | 64        |
| Exp.                                        |                                |                     |                                         | 90        |



**The optimized coordinates of all the stationary points in PES at the SMD-B3LYP-631G(d) level.**

**1. REACTANTS**

**2. STEP1 (protonation)**

**3. STEP2 (C-C bond formation) for model catalyst**

**3.1 MODE a**

**3.2 MODE b**

**3.3 MODE c**

**3.4 TS2s involving Z-ketimine**

**4. STEP3 (protonation of product) for model catalyst**

**5. Lowest-lying transition states for real catalyst**

**1. REACTANTS**

**Z-Ketimine**

|   |             |             |             |
|---|-------------|-------------|-------------|
| C | 4.04689000  | -2.10683800 | 0.26267800  |
| C | 4.79376600  | -0.93132700 | 0.39504800  |
| C | 4.19765300  | 0.33621000  | 0.31410100  |
| C | 2.82706200  | 0.38564600  | 0.09702700  |
| C | 2.06342300  | -0.79222800 | -0.03686600 |
| C | 2.66676300  | -2.04272700 | 0.04323900  |
| N | 2.00140100  | 1.51996400  | -0.02284300 |
| C | 0.68964200  | 1.15306100  | -0.23558000 |
| C | 0.67806000  | -0.38353700 | -0.25558100 |
| O | -0.26789900 | 1.89377100  | -0.37653700 |
| H | 4.54111000  | -3.07116400 | 0.33002000  |
| H | 5.86497700  | -0.99583200 | 0.56552200  |
| H | 4.79062000  | 1.23885900  | 0.41806500  |
| H | 2.06923100  | -2.94334800 | -0.06444200 |
| C | 2.45078500  | 2.89582400  | 0.06701000  |
| H | 2.89504800  | 3.09575700  | 1.04840000  |
| H | 3.18906300  | 3.11377200  | -0.71251300 |
| H | 1.58013500  | 3.53854900  | -0.07206900 |
| N | -0.33429600 | -1.13593700 | -0.42445300 |
| C | -1.62785500 | -0.64188100 | -0.70326900 |
| O | -2.03700400 | -0.52299600 | -1.83928400 |
| O | -2.31113100 | -0.51450800 | 0.43708900  |
| C | -3.74309500 | -0.12657500 | 0.44271400  |
| C | -4.06172700 | -0.07770500 | 1.93737800  |

|   |             |             |             |
|---|-------------|-------------|-------------|
| H | -5.11126200 | 0.19673800  | 2.08759000  |
| H | -3.88987400 | -1.05251300 | 2.40633400  |
| H | -3.43546500 | 0.66438900  | 2.44379500  |
| C | -4.57004400 | -1.20561100 | -0.25947800 |
| H | -4.33340200 | -1.25883400 | -1.32395400 |
| H | -4.38674500 | -2.18674500 | 0.19285600  |
| H | -5.63663400 | -0.97725600 | -0.15197000 |
| C | -3.91111600 | 1.25385000  | -0.19567700 |
| H | -4.94226400 | 1.59677700  | -0.05249900 |
| H | -3.23855400 | 1.97777700  | 0.27533700  |
| H | -3.69869300 | 1.22778600  | -1.26600200 |

---

**E-Ketimine**

|   |             |             |             |
|---|-------------|-------------|-------------|
| C | 1.59767600  | 2.92163700  | -0.12902400 |
| C | 2.96037100  | 2.75555300  | 0.13759500  |
| C | 3.53555300  | 1.48358300  | 0.26355900  |
| C | 2.70066300  | 0.38229900  | 0.12050800  |
| C | 1.31900100  | 0.53328900  | -0.13984000 |
| C | 0.76657900  | 1.80639500  | -0.27254300 |
| N | 3.04684400  | -0.97458900 | 0.19402100  |
| C | 1.94054000  | -1.77789900 | -0.01420700 |
| C | 0.75864900  | -0.81859500 | -0.22683500 |
| O | 1.91700400  | -2.99318000 | -0.01933400 |
| H | 1.18324000  | 3.91983000  | -0.22957900 |
| H | 3.59433400  | 3.63127900  | 0.24613200  |
| H | 4.59553000  | 1.36916000  | 0.46465300  |
| H | -0.28657400 | 1.93365500  | -0.49851600 |
| C | 4.38103300  | -1.48730900 | 0.43328200  |
| H | 5.06963700  | -1.16613800 | -0.35637800 |
| H | 4.76122800  | -1.14524500 | 1.40235300  |
| H | 4.31953200  | -2.57679200 | 0.43501700  |
| N | -0.40858500 | -1.29720600 | -0.40597200 |
| C | -1.54387100 | -0.51383900 | -0.66852300 |
| O | -1.78470900 | -0.03759900 | -1.76158200 |
| O | -2.32531400 | -0.50292700 | 0.41588600  |
| C | -3.70029900 | 0.05740300  | 0.38672600  |
| C | -4.17895800 | -0.18458000 | 1.81836100  |
| H | -5.20401100 | 0.18202100  | 1.93765100  |
| H | -4.16414300 | -1.25297700 | 2.05753400  |
| H | -3.53966200 | 0.33877500  | 2.53734600  |
| C | -4.54890300 | -0.72668100 | -0.61608400 |
| H | -4.19670000 | -0.57920400 | -1.63909300 |
| H | -4.52574500 | -1.79732600 | -0.38497200 |

|   |             |             |             |
|---|-------------|-------------|-------------|
| H | -5.58964600 | -0.38880200 | -0.55596000 |
| C | -3.65251900 | 1.55396900  | 0.07120100  |
| H | -4.65360200 | 1.98328200  | 0.19237000  |
| H | -2.97898600 | 2.07208300  | 0.76308000  |
| H | -3.32116400 | 1.73727100  | -0.95279900 |

-----

**nitromethane**

|   |             |             |             |
|---|-------------|-------------|-------------|
| C | 1.32572800  | -0.00019700 | -0.00224500 |
| H | 1.66797400  | -0.90664000 | -0.49859400 |
| H | 1.63199900  | 0.00145000  | 1.04696900  |
| H | 1.66814800  | 0.90469000  | -0.50133800 |
| N | -0.16865400 | -0.00000100 | -0.01200100 |
| O | -0.73366700 | 1.09066500  | 0.00315100  |
| O | -0.73407200 | -1.09045300 | 0.00315300  |

-----

**nitronate**

|   |             |             |             |
|---|-------------|-------------|-------------|
| C | -1.29332900 | -0.00025600 | -0.00089700 |
| H | -1.80672200 | 0.95126000  | 0.00214700  |
| H | -1.80637200 | -0.95198100 | 0.00211900  |
| N | 0.04635800  | -0.00013200 | 0.00000400  |
| O | 0.69082300  | -1.11110800 | 0.00006900  |
| O | 0.69024800  | 1.11150600  | 0.00006600  |

-----

**QN-model**

|   |             |             |             |
|---|-------------|-------------|-------------|
| C | 0.49066600  | -0.64068900 | 0.71728700  |
| C | -0.83259300 | -1.05207000 | 0.07759000  |
| C | -1.94687600 | -0.15308800 | 0.02510600  |
| C | -0.98998700 | -2.30653900 | -0.47381200 |
| C | -1.92263200 | 1.17019700  | 0.54424200  |
| C | -3.15293500 | -0.63337900 | -0.58380300 |
| C | -2.22236700 | -2.67336500 | -1.06208300 |
| H | -0.17270800 | -3.01920600 | -0.44294700 |
| C | -3.04410800 | 1.97413300  | 0.46874800  |
| H | -1.01811500 | 1.56506800  | 0.99929700  |
| C | -4.28639800 | 0.22394200  | -0.63676900 |
| H | -2.33403100 | -3.66629300 | -1.49656700 |
| C | -4.24069900 | 1.49641400  | -0.12540200 |
| H | -5.18918300 | -0.16426300 | -1.09871000 |
| H | -5.10224000 | 2.15587800  | -0.16417800 |
| C | 1.33666900  | 0.24559700  | -0.23507100 |
| H | 0.62138900  | 0.88892700  | -0.75781700 |
| C | 2.16461400  | -0.54863400 | -1.29415600 |

|   |             |             |             |
|---|-------------|-------------|-------------|
| C | 2.71529300  | 2.19623700  | -0.41729400 |
| C | 3.35065900  | 0.49210000  | 1.14114000  |
| C | 3.59737600  | 0.02488700  | -1.31183000 |
| H | 2.20202400  | -1.61345600 | -1.04528500 |
| H | 1.70245700  | -0.45784800 | -2.28452100 |
| C | 3.53438200  | 1.54273600  | -1.57443500 |
| H | 1.86268900  | 2.76361300  | -0.80832500 |
| H | 3.33374100  | 2.89519700  | 0.15721700  |
| C | 4.23681600  | -0.21351200 | 0.07007900  |
| H | 2.97316300  | -0.22822200 | 1.86881000  |
| H | 3.92225000  | 1.24768600  | 1.69254200  |
| H | 4.18625500  | -0.47100400 | -2.09216400 |
| H | 4.54798900  | 1.96006800  | -1.62068200 |
| H | 4.30200800  | -1.28961300 | 0.27033000  |
| H | 5.26075900  | 0.18099500  | 0.08351600  |
| O | -3.08008900 | 3.24943000  | 0.94821000  |
| N | -3.27517500 | -1.88223800 | -1.12035900 |
| N | 2.19754500  | 1.18495300  | 0.52659600  |
| H | -2.21415600 | 3.46994000  | 1.33213100  |
| H | 0.27947300  | -0.03148000 | 1.60779500  |
| O | 1.25509100  | -1.77522200 | 1.11445700  |
| C | 0.83083600  | -2.35646300 | 2.33861900  |
| H | -0.20381400 | -2.72234300 | 2.28822600  |
| H | 1.49596500  | -3.20280100 | 2.53249800  |
| H | 0.91095000  | -1.64174100 | 3.17163700  |
| H | 3.06423100  | 1.73721300  | -2.54673300 |

---

**QN-real**

|   |             |             |             |
|---|-------------|-------------|-------------|
| C | 0.64662300  | 0.01422100  | 0.08855600  |
| C | 0.89936100  | 1.15543100  | -0.88894300 |
| C | 1.64055200  | 2.31567700  | -0.49056300 |
| C | 0.45179100  | 1.08887100  | -2.19168000 |
| C | 2.15403300  | 2.52129800  | 0.81946300  |
| C | 1.86421500  | 3.32478300  | -1.48497200 |
| C | 0.72928500  | 2.14472900  | -3.09000000 |
| H | -0.12221900 | 0.23440700  | -2.53283000 |
| C | 2.85861000  | 3.67063600  | 1.12442100  |
| H | 2.00367300  | 1.77516400  | 1.59507600  |
| C | 2.59534800  | 4.49188400  | -1.13019300 |
| H | 0.37057500  | 2.08159000  | -4.11651100 |
| C | 3.08354100  | 4.66714800  | 0.13981600  |
| H | 2.75094500  | 5.24024600  | -1.90119800 |
| H | 3.64212800  | 5.55592500  | 0.41670800  |
| C | 1.90447900  | -0.87990000 | 0.24105000  |

|   |             |             |             |
|---|-------------|-------------|-------------|
| H | 2.73838700  | -0.17254200 | 0.28884300  |
| C | 2.16482500  | -1.86860800 | -0.93387400 |
| C | 3.32381300  | -2.03197400 | 1.77469300  |
| C | 1.05569900  | -2.76783900 | 1.56304700  |
| C | 2.64152800  | -3.20857600 | -0.33249500 |
| H | 1.25223000  | -2.04645800 | -1.51162600 |
| H | 2.90655000  | -1.45596900 | -1.62566000 |
| C | 3.83900900  | -2.99415700 | 0.63845400  |
| H | 3.96506800  | -1.14570300 | 1.84778300  |
| H | 3.35870900  | -2.53795200 | 2.74566100  |
| C | 1.47768400  | -3.80801600 | 0.48145800  |
| H | 0.02748200  | -2.43686000 | 1.41110900  |
| H | 1.11259200  | -3.19869900 | 2.56879700  |
| H | 2.93951500  | -3.89262900 | -1.13481900 |
| H | 4.08206400  | -3.97068800 | 1.07697100  |
| H | 0.63734000  | -4.03883200 | -0.18430400 |
| H | 1.78995500  | -4.75292300 | 0.94335800  |
| C | 5.07861100  | -2.47144000 | -0.03533000 |
| H | 5.01001200  | -1.47002500 | -0.46466400 |
| C | 6.23716200  | -3.12838800 | -0.12859800 |
| H | 6.36612600  | -4.12648500 | 0.28791000  |
| H | 7.10275500  | -2.69509300 | -0.62466200 |
| O | 3.37334300  | 3.92232400  | 2.36004800  |
| N | 1.40917500  | 3.22665200  | -2.76700000 |
| N | 1.93878400  | -1.58178000 | 1.54725700  |
| H | 3.15861400  | 3.18192400  | 2.95312800  |
| H | 0.42107500  | 0.41295900  | 1.08354000  |
| O | -0.45848000 | -0.79928900 | -0.32715700 |
| C | -5.12517800 | 2.78378100  | 1.41407000  |
| C | -3.80897300 | 2.44559900  | 1.16398700  |
| C | -3.46613600 | 1.16838600  | 0.65895100  |
| C | -4.49652400 | 0.21861000  | 0.39909200  |
| C | -5.83320500 | 0.59252800  | 0.67027100  |
| C | -6.14515500 | 1.84604700  | 1.16771900  |
| C | -2.09202700 | 0.83628600  | 0.41314400  |
| C | -4.12358100 | -1.08427800 | -0.13946200 |
| C | -2.74951600 | -1.38411700 | -0.37987400 |
| C | -1.74180000 | -0.38822300 | -0.07638700 |
| C | -2.38817300 | -2.64392700 | -0.91027700 |
| H | -1.34089700 | -2.85236900 | -1.09461000 |
| C | -3.34810000 | -3.59685300 | -1.19593200 |
| C | -4.70400900 | -3.31255800 | -0.95882600 |
| C | -5.07771300 | -2.08407800 | -0.44397200 |
| H | -1.34773700 | 1.59642500  | 0.61906200  |

|   |             |             |             |
|---|-------------|-------------|-------------|
| H | -5.37224100 | 3.76878600  | 1.80101400  |
| H | -3.01233300 | 3.16128100  | 1.35299600  |
| H | -6.64027600 | -0.10907300 | 0.48880400  |
| H | -7.18160100 | 2.10526900  | 1.36582300  |
| H | -3.05433100 | -4.56050800 | -1.60301000 |
| H | -5.46378100 | -4.05682800 | -1.18172900 |
| H | -6.13147300 | -1.89062500 | -0.27677500 |

---

## 2. STEP1 (protonation)

### RC1

|   |             |             |             |
|---|-------------|-------------|-------------|
| C | 0.46576800  | -0.86248100 | 0.85648900  |
| C | -0.83727200 | -1.55485500 | 0.45377700  |
| C | -1.95746400 | -0.81386200 | -0.04520500 |
| C | -0.96642400 | -2.92497400 | 0.55476700  |
| C | -1.96157300 | 0.59556000  | -0.20550500 |
| C | -3.13690900 | -1.55208300 | -0.39226900 |
| C | -2.17387300 | -3.55437500 | 0.17312500  |
| H | -0.14607100 | -3.52157600 | 0.93909500  |
| C | -3.08240000 | 1.25763600  | -0.67649700 |
| H | -1.07431000 | 1.16815700  | 0.03146700  |
| C | -4.27101500 | -0.84188700 | -0.87537700 |
| H | -2.26217900 | -4.63734400 | 0.25488300  |
| C | -4.25167900 | 0.52331100  | -1.01436900 |
| H | -5.15443800 | -1.41996500 | -1.12992100 |
| H | -5.11667800 | 1.06741300  | -1.38154400 |
| C | 1.33770900  | -0.54207800 | -0.38236300 |
| H | 0.64883600  | -0.09811900 | -1.10846200 |
| C | 2.01345200  | -1.78471800 | -1.03289300 |
| C | 2.77812100  | 1.05454100  | -1.43592600 |
| C | 3.53879600  | -0.00311000 | 0.58093000  |
| C | 3.41765100  | -1.36836600 | -1.51759200 |
| H | 2.10608100  | -2.60100900 | -0.30871900 |
| H | 1.40524100  | -2.15344400 | -1.86662500 |
| C | 3.30360800  | -0.08348300 | -2.36248500 |
| H | 1.93203700  | 1.58111000  | -1.89109800 |
| H | 3.55991400  | 1.79864600  | -1.24551800 |
| C | 4.28333100  | -1.06860400 | -0.27889700 |
| H | 3.20752700  | -0.42742200 | 1.52881400  |
| H | 4.19020000  | 0.84982200  | 0.80367400  |
| H | 3.86496200  | -2.17468600 | -2.10963000 |
| H | 4.27910600  | 0.18122700  | -2.78846100 |

|   |             |             |             |
|---|-------------|-------------|-------------|
| H | 4.44449700  | -1.98591100 | 0.30017600  |
| H | 5.27135400  | -0.70526100 | -0.58926800 |
| O | -3.13902700 | 2.60046600  | -0.84193900 |
| N | -3.22961400 | -2.90851100 | -0.28191700 |
| N | 2.34303500  | 0.52742000  | -0.12049100 |
| H | -2.28696100 | 3.00781000  | -0.57847500 |
| H | 0.22643700  | 0.09708200  | 1.33714500  |
| O | 1.21567400  | -1.65457400 | 1.77307500  |
| C | 0.74606400  | -1.57977100 | 3.11214200  |
| H | -0.28922200 | -1.93371300 | 3.20906800  |
| H | 1.39648800  | -2.22260500 | 3.71212600  |
| H | 0.80467700  | -0.55163400 | 3.50013700  |
| C | 1.38674500  | 3.63232900  | 0.98065500  |
| H | 1.81619900  | 4.32889800  | 0.26174600  |
| H | 1.73875900  | 2.60706300  | 0.78314100  |
| H | 1.57093400  | 3.92656500  | 2.01225600  |
| N | -0.08291700 | 3.59704400  | 0.76513700  |
| O | -0.81637700 | 3.43166400  | 1.73045600  |
| O | -0.48067500 | 3.67031000  | -0.40721900 |
| H | 2.62050600  | -0.24809100 | -3.20512600 |

---

**TS1**

|   |             |             |             |
|---|-------------|-------------|-------------|
| C | 0.39615000  | -0.81639200 | 0.81974700  |
| C | -0.91723200 | -1.47578400 | 0.39269500  |
| C | -2.00092700 | -0.67883600 | -0.09438100 |
| C | -1.10148500 | -2.83994800 | 0.46953500  |
| C | -1.92898800 | 0.72500600  | -0.21852000 |
| C | -3.21570900 | -1.34920000 | -0.45150500 |
| C | -2.33795800 | -3.40427700 | 0.07021600  |
| H | -0.31261500 | -3.48198800 | 0.84792600  |
| C | -3.01797000 | 1.47097300  | -0.63515700 |
| H | -1.02258200 | 1.24935500  | 0.03317300  |
| C | -4.31379700 | -0.56287500 | -0.90087500 |
| H | -2.47471600 | -4.48360400 | 0.12873900  |
| C | -4.22637900 | 0.80665500  | -0.98812100 |
| H | -5.22931800 | -1.08341400 | -1.16661600 |
| H | -5.07029800 | 1.40440200  | -1.31988400 |
| C | 1.25966400  | -0.50322400 | -0.42661300 |
| H | 0.58857100  | -0.04848100 | -1.15862000 |
| C | 1.96324200  | -1.73883500 | -1.05013700 |
| C | 2.77212900  | 1.08946700  | -1.50798200 |
| C | 3.48078900  | 0.04731600  | 0.59134700  |
| C | 3.38106600  | -1.33972200 | -1.50299000 |
| H | 2.02640900  | -2.54657700 | -0.31566000 |

|   |             |             |             |
|---|-------------|-------------|-------------|
| H | 1.37324500  | -2.10442200 | -1.89619900 |
| C | 3.29083500  | -0.07776000 | -2.38160200 |
| H | 1.92939100  | 1.61895100  | -1.95888400 |
| H | 3.55278300  | 1.82320700  | -1.29181500 |
| C | 4.22388500  | -1.01955400 | -0.25232700 |
| H | 3.09421900  | -0.36376200 | 1.52254100  |
| H | 4.10882500  | 0.91229400  | 0.82195700  |
| H | 3.83835400  | -2.16045100 | -2.06452500 |
| H | 4.27195700  | 0.17372500  | -2.79841200 |
| H | 4.37317000  | -1.92532100 | 0.34454100  |
| H | 5.21472300  | -0.65684600 | -0.54845300 |
| O | -2.97975400 | 2.81529800  | -0.71840200 |
| N | -3.36465500 | -2.70267300 | -0.37096000 |
| N | 2.30333300  | 0.56669300  | -0.17940700 |
| H | -2.09452500 | 3.13638300  | -0.40153600 |
| H | 0.16242500  | 0.13364300  | 1.32160200  |
| O | 1.14551600  | -1.63275600 | 1.71156500  |
| C | 0.67599200  | -1.58422500 | 3.05643900  |
| H | -0.35544800 | -1.94839600 | 3.14394000  |
| H | 1.33330100  | -2.23322800 | 3.64125600  |
| H | 0.72661500  | -0.56235500 | 3.45889200  |
| C | 1.55065800  | 2.95532400  | 0.99411400  |
| H | 2.07120700  | 3.64332700  | 0.33178700  |
| H | 1.87577400  | 1.52814500  | 0.38396800  |
| H | 1.89185900  | 2.93933700  | 2.02647600  |
| N | 0.16938900  | 3.13041800  | 0.92383900  |
| O | -0.56029700 | 2.77298100  | 1.87263400  |
| O | -0.33661400 | 3.55763800  | -0.16302100 |
| H | 2.61560300  | -0.25493700 | -3.22600900 |

-----

**IM1**

|   |             |             |             |
|---|-------------|-------------|-------------|
| C | 0.39669900  | -0.84078200 | 0.83908300  |
| C | -0.92054300 | -1.49051900 | 0.41065700  |
| C | -1.99282600 | -0.68159800 | -0.08151400 |
| C | -1.11479400 | -2.85347000 | 0.48144600  |
| C | -1.90633700 | 0.72138000  | -0.19820300 |
| C | -3.20798800 | -1.34191300 | -0.45696400 |
| C | -2.35265400 | -3.40604300 | 0.06971900  |
| H | -0.33289600 | -3.50339300 | 0.86108800  |
| C | -2.98152300 | 1.47914400  | -0.63274600 |
| H | -1.00571400 | 1.24137700  | 0.08211100  |
| C | -4.29234600 | -0.54473600 | -0.92033300 |
| H | -2.49949300 | -4.48423600 | 0.12433700  |
| C | -4.19020200 | 0.82396600  | -1.00522800 |



|   |             |             |             |
|---|-------------|-------------|-------------|
| H | -5.20881300 | -1.05613900 | -1.20032000 |
| H | -5.02351800 | 1.42942100  | -1.34977900 |
| C | 1.24470400  | -0.51862800 | -0.41426100 |
| H | 0.57076200  | -0.04604600 | -1.13133000 |
| C | 1.94473900  | -1.74014400 | -1.06183500 |
| C | 2.74795300  | 1.10577800  | -1.49203500 |
| C | 3.49601900  | 0.00864500  | 0.58179900  |
| C | 3.34908700  | -1.32642800 | -1.54371400 |
| H | 2.02916100  | -2.55321100 | -0.33542300 |
| H | 1.33714700  | -2.10180600 | -1.89655300 |
| C | 3.23362800  | -0.04882300 | -2.39749200 |
| H | 1.89761600  | 1.65303600  | -1.90387200 |
| H | 3.53905100  | 1.82531800  | -1.26977800 |
| C | 4.22364000  | -1.02678200 | -0.30944200 |
| H | 3.11656500  | -0.43175500 | 1.50213200  |
| H | 4.11982000  | 0.87086400  | 0.82966200  |
| H | 3.79457700  | -2.13454700 | -2.13176700 |
| H | 4.20157100  | 0.20856000  | -2.83983600 |
| H | 4.39860400  | -1.94375000 | 0.26214000  |
| H | 5.20139700  | -0.64514200 | -0.62358000 |
| O | -2.92777300 | 2.81990400  | -0.71508400 |
| N | -3.36810000 | -2.69426700 | -0.38158500 |
| N | 2.30294100  | 0.54622300  | -0.16331800 |
| H | -2.03269200 | 3.13281600  | -0.39927500 |
| H | 0.16959200  | 0.10534400  | 1.35264700  |
| O | 1.15530800  | -1.66761200 | 1.71196800  |
| C | 0.69908800  | -1.63608500 | 3.06295500  |
| H | -0.33204200 | -1.99931600 | 3.15499300  |
| H | 1.36115800  | -2.29425200 | 3.63169200  |
| H | 0.75620000  | -0.61962900 | 3.47763000  |
| C | 1.52783200  | 3.05524400  | 1.06773800  |
| H | 2.07395200  | 3.69171300  | 0.37866100  |
| H | 1.90158000  | 1.40364200  | 0.38998500  |
| H | 1.85214400  | 3.02369700  | 2.10292300  |
| N | 0.16586500  | 3.15900900  | 0.93721200  |
| O | -0.59890500 | 2.79706400  | 1.86610200  |
| O | -0.32203600 | 3.54202000  | -0.18671000 |
| H | 2.53150500  | -0.20955200 | -3.22262000 |

-----  
**IM1a**

|   |             |             |             |
|---|-------------|-------------|-------------|
| C | 0.31288500  | -1.08070600 | 0.82321300  |
| C | -1.08906200 | -1.54412000 | 0.43187100  |
| C | -2.05286900 | -0.58383100 | -0.01145700 |

|   |             |             |             |
|---|-------------|-------------|-------------|
| C | -1.46334200 | -2.86936500 | 0.46960600  |
| C | -1.77339300 | 0.79710800  | -0.10400600 |
| C | -3.34556600 | -1.06525400 | -0.39694600 |
| C | -2.77539500 | -3.23703900 | 0.07990100  |
| H | -0.76348800 | -3.63074600 | 0.79860900  |
| C | -2.71330800 | 1.68974500  | -0.59281000 |
| H | -0.81030700 | 1.19572100  | 0.18159600  |
| C | -4.30462000 | -0.12242900 | -0.86349200 |
| H | -3.06761000 | -4.28603400 | 0.11777700  |
| C | -4.00282600 | 1.21546100  | -0.96608400 |
| H | -5.28350300 | -0.49844400 | -1.14694100 |
| H | -4.73284400 | 1.92984800  | -1.33554600 |
| C | 1.12636300  | -0.70530400 | -0.44533000 |
| H | 0.43619700  | -0.21780900 | -1.13475100 |
| C | 1.84289700  | -1.87989100 | -1.15492400 |
| C | 2.58897700  | 1.00880000  | -1.44936400 |
| C | 3.36034800  | -0.17830700 | 0.56434600  |
| C | 3.23433100  | -1.40842300 | -1.62384300 |
| H | 1.94914700  | -2.72636300 | -0.47142400 |
| H | 1.23698500  | -2.21104000 | -2.00389600 |
| C | 3.08415100  | -0.09297800 | -2.41414300 |
| H | 1.73220200  | 1.57318300  | -1.81962300 |
| H | 3.37432500  | 1.72307000  | -1.19042500 |
| C | 4.11030400  | -1.14715800 | -0.38122500 |
| H | 2.99232000  | -0.67862400 | 1.45895400  |
| H | 3.96541000  | 0.67988800  | 0.86462300  |
| H | 3.69531000  | -2.17626900 | -2.25275100 |
| H | 4.04169700  | 0.20191100  | -2.85589500 |
| H | 4.31696300  | -2.08611600 | 0.14217500  |
| H | 5.07389800  | -0.72179300 | -0.68310100 |
| O | -2.44806600 | 3.00370100  | -0.73025200 |
| N | -3.69028600 | -2.38442400 | -0.34111100 |
| N | 2.15834400  | 0.37356000  | -0.15277200 |
| H | -1.48016200 | 3.15838700  | -0.52720700 |
| H | 0.21690600  | -0.17316400 | 1.43677100  |
| O | 1.03408300  | -2.05818100 | 1.56201500  |
| C | 0.68325600  | -2.10950600 | 2.94197800  |
| H | -0.36620100 | -2.39452600 | 3.08877700  |
| H | 1.32521000  | -2.86745200 | 3.39867300  |
| H | 0.85853400  | -1.14269100 | 3.43538000  |
| C | 0.35842300  | 4.31334100  | 1.67819800  |
| H | 0.67645800  | 4.32498900  | 2.70988900  |
| H | 1.71652600  | 1.15223200  | 0.45524800  |
| H | -0.15121600 | 5.13691100  | 1.20066000  |

|   |            |             |             |
|---|------------|-------------|-------------|
| N | 0.59130600 | 3.23793400  | 0.97155000  |
| O | 0.23393000 | 3.14162500  | -0.28026300 |
| O | 1.20101000 | 2.20961100  | 1.51267900  |
| H | 2.37469500 | -0.22948600 | -3.23761100 |

---

**IM1b**

|   |             |             |             |
|---|-------------|-------------|-------------|
| C | -0.14711900 | -1.29097500 | 0.71919200  |
| C | -1.62825200 | -1.30113200 | 0.34636300  |
| C | -2.27928500 | -0.06032100 | 0.06426300  |
| C | -2.36259700 | -2.45982500 | 0.22710900  |
| C | -1.61538700 | 1.18022100  | 0.14694700  |
| C | -3.64638200 | -0.09712600 | -0.35552500 |
| C | -3.72243100 | -2.38409300 | -0.16918000 |
| H | -1.91096300 | -3.42580100 | 0.42964500  |
| C | -2.23455200 | 2.35579400  | -0.23780500 |
| H | -0.59792100 | 1.25307700  | 0.50192900  |
| C | -4.28058300 | 1.13349400  | -0.68839100 |
| H | -4.30180800 | -3.30256500 | -0.25711800 |
| C | -3.59746300 | 2.32824400  | -0.64596500 |
| H | -5.32130200 | 1.09711300  | -0.99729700 |
| H | -4.07988300 | 3.26055500  | -0.92463200 |
| C | 0.72303300  | -1.02547000 | -0.54923100 |
| H | 0.12158400  | -0.43510800 | -1.24069100 |
| C | 1.26567500  | -2.30062100 | -1.25335000 |
| C | 2.63617700  | 0.21798100  | -1.52246900 |
| C | 2.86590600  | -0.75506300 | 0.73214800  |
| C | 2.80741200  | -2.26766900 | -1.27976800 |
| H | 0.92272300  | -3.18982300 | -0.72153100 |
| H | 0.87314600  | -2.34970200 | -2.27410200 |
| C | 3.27243900  | -1.05851500 | -2.11192000 |
| H | 1.89270900  | 0.66826300  | -2.18299400 |
| H | 3.35421900  | 0.98922100  | -1.24181400 |
| C | 3.33469400  | -2.11345300 | 0.16091900  |
| H | 2.34548000  | -0.85849000 | 1.68437100  |
| H | 3.66893000  | -0.03069600 | 0.86325900  |
| H | 3.18640500  | -3.19591800 | -1.71866600 |
| H | 4.36520900  | -0.98496600 | -2.09210000 |
| H | 2.95759500  | -2.93043600 | 0.78242200  |
| H | 4.42856200  | -2.16290600 | 0.17132900  |
| O | -1.56866500 | 3.52984400  | -0.23976700 |
| N | -4.35196900 | -1.26097600 | -0.45897700 |
| N | 1.90780900  | -0.12239700 | -0.24156900 |
| H | -0.60625600 | 3.33259500  | -0.07334600 |
| H | 0.01588900  | -0.46375700 | 1.42486000  |

|   |             |             |             |
|---|-------------|-------------|-------------|
| O | 0.27881400  | -2.49418700 | 1.33905600  |
| C | -0.07729800 | -2.58547500 | 2.71527900  |
| H | -1.16417300 | -2.55338300 | 2.86171400  |
| H | 0.30274200  | -3.54596700 | 3.07280700  |
| H | 0.38317800  | -1.77609400 | 3.30070200  |
| C | 2.03821400  | 4.38467800  | 0.98821600  |
| H | 2.92863800  | 4.82583900  | 1.41064700  |
| H | 1.58510000  | 0.81924700  | 0.11481400  |
| H | 1.12156000  | 4.93260100  | 0.83018200  |
| N | 2.08924100  | 3.11904500  | 0.64683200  |
| O | 1.02450800  | 2.52857000  | 0.10908600  |
| O | 3.13110200  | 2.39203100  | 0.80279700  |
| H | 2.97379800  | -1.17670000 | -3.15875500 |

---

**IM1c**

|   |             |             |             |
|---|-------------|-------------|-------------|
| C | 0.28445900  | -1.10605200 | 0.78335300  |
| C | -1.09306600 | -1.58072700 | 0.32326700  |
| C | -2.10662800 | -0.62495000 | -0.00193800 |
| C | -1.38364500 | -2.91878700 | 0.16432900  |
| C | -1.92510200 | 0.76831200  | 0.14035500  |
| C | -3.35346800 | -1.12491500 | -0.50202700 |
| C | -2.65655000 | -3.30535100 | -0.32242600 |
| H | -0.64683200 | -3.67627700 | 0.41117400  |
| C | -2.92986700 | 1.66056200  | -0.20333900 |
| H | -1.01298300 | 1.18643700  | 0.54813300  |
| C | -4.36541700 | -0.18733500 | -0.85117100 |
| H | -2.88243100 | -4.36421600 | -0.44440100 |
| C | -4.16453900 | 1.16561900  | -0.71297600 |
| H | -5.30566800 | -0.57829500 | -1.22917300 |
| H | -4.94017800 | 1.87870100  | -0.97707200 |
| C | 1.10834300  | -0.66306500 | -0.45456800 |
| H | 0.42527800  | -0.12013000 | -1.10994600 |
| C | 1.79901900  | -1.82773000 | -1.21813600 |
| C | 2.79877800  | 0.87652600  | -1.38969800 |
| C | 3.24404700  | -0.17619700 | 0.78970500  |
| C | 3.31701000  | -1.57145000 | -1.30194100 |
| H | 1.61338100  | -2.77081900 | -0.70025000 |
| H | 1.37409800  | -1.91180500 | -2.22337200 |
| C | 3.56556200  | -0.26988800 | -2.08553400 |
| H | 1.98301000  | 1.27162600  | -1.99830300 |
| H | 3.43436500  | 1.71381100  | -1.09924600 |
| C | 3.88375200  | -1.41579200 | 0.12298800  |
| H | 2.78047200  | -0.40865400 | 1.74685900  |
| H | 3.95429500  | 0.63998100  | 0.93914400  |

|   |             |             |             |
|---|-------------|-------------|-------------|
| H | 3.80324400  | -2.41264100 | -1.80570900 |
| H | 4.63740800  | -0.04664200 | -2.11722100 |
| H | 3.65939200  | -2.30991900 | 0.71123400  |
| H | 4.97234600  | -1.30245300 | 0.08750700  |
| O | -2.78442700 | 2.99180200  | -0.07185100 |
| N | -3.61014400 | -2.45611000 | -0.65487400 |
| N | 2.17015100  | 0.36954700  | -0.11218500 |
| H | -1.88680900 | 3.18188800  | 0.33608900  |
| H | 0.15746100  | -0.23627700 | 1.44353700  |
| O | 1.00720400  | -2.11070800 | 1.48170600  |
| C | 0.60474900  | -2.26728400 | 2.83925400  |
| H | -0.44423600 | -2.57802700 | 2.92283000  |
| H | 1.24242300  | -3.04559400 | 3.26647300  |
| H | 0.74391300  | -1.33605100 | 3.40739900  |
| C | 0.76312400  | 4.69651600  | -0.07800300 |
| H | -0.11974400 | 5.31653800  | -0.12899000 |
| H | 1.75316200  | 1.25162600  | 0.33963800  |
| H | 1.70987300  | 4.97272100  | -0.51750600 |
| N | 0.69485800  | 3.56758400  | 0.58557700  |
| O | 1.75975100  | 2.82092400  | 0.72891700  |
| O | -0.40216500 | 3.16367200  | 1.15285900  |
| H | 3.22442400  | -0.37625100 | -3.12046900 |

-----  
**TS1'**

|   |             |             |             |
|---|-------------|-------------|-------------|
| C | -5.34648000 | 0.21931200  | 2.43294800  |
| C | -5.42026700 | -1.04320000 | 3.02901400  |
| C | -4.73827200 | -2.14454300 | 2.49569300  |
| C | -3.98011500 | -1.94056800 | 1.34993200  |
| C | -3.89890500 | -0.67068800 | 0.72643400  |
| C | -4.58578300 | 0.41326600  | 1.27673700  |
| N | -3.21180900 | -2.88782800 | 0.66318900  |
| C | -2.57814300 | -2.30767400 | -0.41389500 |
| C | -3.00961100 | -0.83189300 | -0.42404300 |
| O | -1.84315000 | -2.86020100 | -1.20957000 |
| H | -5.88596700 | 1.05519700  | 2.86781600  |
| H | -6.01968200 | -1.17981400 | 3.92525800  |
| H | -4.79759300 | -3.11931800 | 2.96831900  |
| H | -4.53409300 | 1.38501100  | 0.80493700  |
| C | -3.04071400 | -4.27276800 | 1.05039800  |
| H | -4.00034600 | -4.80168900 | 1.04390600  |
| H | -2.37038000 | -4.73659000 | 0.32497000  |
| H | -2.59694800 | -4.34480500 | 2.04994500  |
| N | -2.54466800 | -0.09346500 | -1.36236400 |
| C | -2.92571400 | 1.25242100  | -1.54250800 |

|   |             |             |             |
|---|-------------|-------------|-------------|
| O | -4.06026800 | 1.68230600  | -1.43625800 |
| O | -1.85547700 | 1.92736800  | -1.96635300 |
| C | -1.92822700 | 3.36327500  | -2.31184000 |
| C | -0.48019800 | 3.68100300  | -2.68874700 |
| H | -0.39377300 | 4.72699000  | -3.00134500 |
| H | 0.18880800  | 3.51838000  | -1.83682600 |
| H | -0.14657500 | 3.04300100  | -3.51365300 |
| C | -2.36909800 | 4.17671800  | -1.09222900 |
| H | -3.41638100 | 3.99186400  | -0.84595900 |
| H | -1.75560700 | 3.92248200  | -0.22137400 |
| H | -2.24546800 | 5.24511500  | -1.30294300 |
| C | -2.85477800 | 3.55633800  | -3.51537400 |
| H | -2.81487500 | 4.60146900  | -3.84317000 |
| H | -2.53403900 | 2.92573700  | -4.35196700 |
| H | -3.88898400 | 3.31126100  | -3.26621100 |
| C | 2.54969100  | -0.75630700 | 1.00301800  |
| C | 3.15691600  | -1.48829400 | -0.19567700 |
| C | 2.50267900  | -1.56766500 | -1.46921400 |
| C | 4.41025600  | -2.05552700 | -0.06709500 |
| C | 1.18709700  | -1.09498300 | -1.73143000 |
| C | 3.25155600  | -2.17587900 | -2.53760300 |
| C | 5.03628000  | -2.65801400 | -1.17910700 |
| H | 4.91774100  | -2.03379700 | 0.89124000  |
| C | 0.63806500  | -1.20683400 | -3.00290000 |
| H | 0.57846100  | -0.68094800 | -0.93293000 |
| C | 2.67076000  | -2.23823700 | -3.83344500 |
| H | 6.02508600  | -3.10176400 | -1.06641200 |
| C | 1.40751400  | -1.76311000 | -4.06442500 |
| H | 3.25954100  | -2.68885900 | -4.62690100 |
| H | 0.95043800  | -1.82218500 | -5.04772900 |
| C | 2.80112500  | 0.76533800  | 0.86506700  |
| H | 2.18192100  | 1.07827500  | 0.02008300  |
| C | 4.25800900  | 1.22530300  | 0.61653800  |
| C | 1.97718700  | 2.96009700  | 1.55146700  |
| C | 3.25737500  | 1.65073900  | 3.17855600  |
| C | 4.44115800  | 2.63703500  | 1.21665900  |
| H | 4.97041400  | 0.53248500  | 1.07740800  |
| H | 4.45494100  | 1.22424500  | -0.45945600 |
| C | 3.23095500  | 3.51615500  | 0.83413400  |
| H | 1.09851700  | 2.89274100  | 0.90685700  |
| H | 1.70680100  | 3.54924400  | 2.43156200  |
| C | 4.47479600  | 2.50063900  | 2.75075100  |
| H | 3.52732900  | 0.62648800  | 3.42526000  |
| H | 2.71412800  | 2.08334900  | 4.02312900  |

|   |             |             |             |
|---|-------------|-------------|-------------|
| H | 5.36877600  | 3.08693900  | 0.85014100  |
| H | 3.39921200  | 4.55581000  | 1.13402000  |
| H | 5.39866600  | 2.00980400  | 3.07453700  |
| H | 4.44979200  | 3.49007700  | 3.22202700  |
| O | -0.60386600 | -0.81195400 | -3.33398000 |
| N | 4.49775800  | -2.70556500 | -2.38164000 |
| N | 2.27417900  | 1.56880700  | 2.04090000  |
| H | -1.16856700 | -0.63279700 | -2.54040300 |
| H | 1.46241100  | -0.91096500 | 1.02899900  |
| O | 3.10223500  | -1.20824500 | 2.23503200  |
| C | 2.51927900  | -2.42538700 | 2.69503300  |
| H | 2.73712900  | -3.26256500 | 2.01889100  |
| H | 2.95949100  | -2.63499100 | 3.67365700  |
| H | 1.43044400  | -2.32495900 | 2.79628700  |
| C | -0.16411100 | 0.75469700  | 3.09657900  |
| H | -0.53044300 | 1.67820900  | 3.53755800  |
| H | 1.29565400  | 1.14700500  | 2.47275700  |
| H | -0.06237900 | -0.10115300 | 3.75669500  |
| N | -0.81827500 | 0.44409400  | 1.91440900  |
| O | -0.80870800 | -0.75512000 | 1.50239100  |
| O | -1.31621600 | 1.36555200  | 1.21689000  |
| H | 3.08802100  | 3.51149000  | -0.25221200 |

-----  
**TS1'a**

-----  
**TS1'b**

-----  
**TS1'c**

-----  
**TS1'd**

-----  
**TS1'e**

-----  
**TS1'f**

-----

### 3. STEP2 (C-C bond formation) for model catalyst

#### 3.1 MODE a

##### a-N-gau1-syn-S (si-TS2a)

|   |             |             |             |
|---|-------------|-------------|-------------|
| C | -3.05524200 | 0.02132100  | 0.88140100  |
| C | -3.54299800 | 1.21984800  | 0.07049600  |
| C | -2.68470500 | 1.87085800  | -0.87362400 |
| C | -4.84105300 | 1.66921200  | 0.19817000  |
| C | -1.32358300 | 1.52579400  | -1.07814900 |
| C | -3.26599700 | 2.92539300  | -1.65697600 |
| C | -5.29930200 | 2.73617900  | -0.60800800 |
| H | -5.51093700 | 1.20657800  | 0.91522500  |
| C | -0.56099500 | 2.18785300  | -2.03121000 |
| H | -0.84810600 | 0.74071300  | -0.49975000 |
| C | -2.46191200 | 3.57066200  | -2.63654300 |
| H | -6.32486400 | 3.08816700  | -0.50111300 |
| C | -1.15176200 | 3.21227000  | -2.82578000 |
| H | -2.92140000 | 4.36012000  | -3.22409800 |
| H | -0.53166000 | 3.70691200  | -3.56764600 |
| C | -3.10891200 | -1.24360400 | -0.00407800 |
| H | -2.60177800 | -0.98401100 | -0.93549100 |
| C | -4.52085800 | -1.80131700 | -0.30093200 |
| C | -1.95069200 | -3.34150600 | -0.56889500 |
| C | -2.96189000 | -3.13086900 | 1.66632000  |
| C | -4.45160400 | -3.34222000 | -0.34175900 |
| H | -5.22584100 | -1.48246900 | 0.47276100  |
| H | -4.87266300 | -1.40111800 | -1.25629000 |
| C | -3.27455000 | -3.76990700 | -1.24202400 |
| H | -1.25761800 | -2.82867500 | -1.23728100 |
| H | -1.41681500 | -4.17299500 | -0.10942300 |
| C | -4.19579100 | -3.86031300 | 1.08814000  |
| H | -3.23005200 | -2.39059300 | 2.41802300  |
| H | -2.21287700 | -3.80844900 | 2.08083400  |
| H | -5.39176500 | -3.74853600 | -0.72726600 |
| H | -3.27857300 | -4.85507500 | -1.38899400 |
| H | -5.06688700 | -3.67036900 | 1.72337300  |
| H | -4.03273500 | -4.94357400 | 1.07185600  |



|   |             |             |             |
|---|-------------|-------------|-------------|
| O | 0.73272300  | 1.91269000  | -2.26497700 |
| N | -4.55623100 | 3.34241700  | -1.51324200 |
| N | -2.27053100 | -2.38392900 | 0.55419700  |
| H | 1.11677800  | 1.36663500  | -1.52326000 |
| H | -2.01012900 | 0.18473600  | 1.17428400  |
| O | -3.83523400 | -0.19790400 | 2.05052700  |
| C | -3.47264800 | 0.64789000  | 3.13923200  |
| H | -3.60049300 | 1.70941100  | 2.89096400  |
| H | -4.13815800 | 0.39347900  | 3.96838900  |
| H | -2.43130000 | 0.47502100  | 3.44474600  |
| C | 2.17309100  | -1.67556300 | 1.68511700  |
| H | 2.33372500  | -0.76398800 | 2.24241400  |
| H | -1.37022800 | -1.99661200 | 0.94766500  |
| H | 2.89160700  | -2.48231200 | 1.70866400  |
| N | 0.88130600  | -2.08033300 | 1.55913900  |
| O | -0.05932300 | -1.22533200 | 1.73555000  |
| O | 0.60361300  | -3.25944400 | 1.20432400  |
| H | -3.37158700 | -3.30860100 | -2.23097500 |
| C | 6.48690900  | -0.99654100 | 0.21375900  |
| C | 6.57081700  | -2.16912800 | -0.54113300 |
| C | 5.43326500  | -2.73293100 | -1.13455100 |
| C | 4.21811600  | -2.08461800 | -0.94849400 |
| C | 4.11287200  | -0.90190700 | -0.17930700 |
| C | 5.25552200  | -0.35715800 | 0.40370600  |
| N | 2.96723000  | -2.45038700 | -1.46199000 |
| C | 2.00201800  | -1.52660700 | -1.11352300 |
| C | 2.68995300  | -0.48719700 | -0.23025000 |
| O | 0.83159600  | -1.53972100 | -1.46609600 |
| H | 7.38207300  | -0.57897600 | 0.66534500  |
| H | 7.53225900  | -2.65797300 | -0.67383300 |
| H | 5.50438600  | -3.64192600 | -1.72325500 |
| H | 5.18224800  | 0.53733700  | 1.00974800  |
| C | 2.70723100  | -3.61750300 | -2.27865300 |
| H | 3.30229200  | -3.59052100 | -3.19870800 |
| H | 2.93816300  | -4.53715400 | -1.72944600 |
| H | 1.64748400  | -3.60936800 | -2.53760900 |
| N | 2.11240400  | 0.69566400  | -0.14596000 |
| C | 2.56815000  | 1.64851400  | 0.74353700  |
| O | 3.16906000  | 1.43183800  | 1.79433800  |
| O | 2.17107700  | 2.86611800  | 0.32381300  |
| C | 2.39614800  | 4.08075400  | 1.12467000  |
| C | 1.79271400  | 5.17469200  | 0.24049600  |
| H | 1.88407600  | 6.14941100  | 0.73156600  |
| H | 2.30947200  | 5.22310900  | -0.72389700 |

|   |            |            |            |
|---|------------|------------|------------|
| H | 0.73196600 | 4.98040000 | 0.05062100 |
| C | 3.89596600 | 4.31853300 | 1.32704600 |
| H | 4.33622900 | 3.56160900 | 1.97852800 |
| H | 4.41808600 | 4.30224100 | 0.36361700 |
| H | 4.05379100 | 5.30420000 | 1.77989600 |
| C | 1.63805500 | 3.97920200 | 2.45176800 |
| H | 1.70843900 | 4.93209900 | 2.98884000 |
| H | 0.57793700 | 3.76916500 | 2.27092700 |
| H | 2.05012500 | 3.19145200 | 3.08540700 |

**a-N-gau1-anti-S(si-TS2c)**

|   |             |             |             |
|---|-------------|-------------|-------------|
| C | -3.02570600 | 0.04189400  | 0.93899400  |
| C | -3.44900400 | 1.32382400  | 0.22409000  |
| C | -2.58684800 | 1.96088900  | -0.72666500 |
| C | -4.70071300 | 1.86324000  | 0.43894400  |
| C | -1.26182100 | 1.53567800  | -1.00531200 |
| C | -3.12783600 | 3.08376600  | -1.44087400 |
| C | -5.11354400 | 3.00024600  | -0.29260400 |
| H | -5.37118600 | 1.41265100  | 1.16299300  |
| C | -0.50306300 | 2.17527600  | -1.97649000 |
| H | -0.80957000 | 0.71496200  | -0.45841300 |
| C | -2.32998900 | 3.70515000  | -2.44048000 |
| H | -6.10143000 | 3.42425400  | -0.11477700 |
| C | -1.06066100 | 3.26139200  | -2.71077900 |
| H | -2.76028500 | 4.54612700  | -2.97651900 |
| H | -0.44498700 | 3.73678100  | -3.46878000 |
| C | -3.16317300 | -1.14437600 | -0.03943400 |
| H | -2.59817700 | -0.86907500 | -0.93197500 |
| C | -4.60834300 | -1.53697100 | -0.42616300 |
| C | -2.18940700 | -3.29572400 | -0.73107100 |
| C | -3.28117400 | -3.16363300 | 1.47247200  |
| C | -4.68483100 | -3.06749600 | -0.60311000 |
| H | -5.30865800 | -1.21787700 | 0.35192400  |
| H | -4.88394100 | -1.02182700 | -1.35090100 |
| C | -3.51349700 | -3.53262900 | -1.49289400 |
| H | -1.41775200 | -2.80238500 | -1.32429600 |
| H | -1.76942200 | -4.21827200 | -0.32413200 |
| C | -4.54503200 | -3.72671900 | 0.78301000  |
| H | -3.51782700 | -2.45795400 | 2.26581200  |
| H | -2.62667200 | -3.94258500 | 1.86885900  |
| H | -5.63988100 | -3.34465200 | -1.05934500 |
| H | -3.61412400 | -4.59512600 | -1.73763900 |
| H | -5.42449500 | -3.51241200 | 1.39873000  |

|   |             |             |             |
|---|-------------|-------------|-------------|
| H | -4.47731500 | -4.81545500 | 0.67879400  |
| O | 0.75624500  | 1.82196200  | -2.28546900 |
| N | -4.37442500 | 3.58776600  | -1.21326100 |
| N | -2.46497700 | -2.40344400 | 0.45575900  |
| H | 1.15263000  | 1.25661300  | -1.56569500 |
| H | -1.97159200 | 0.11040500  | 1.23619700  |
| O | -3.81747400 | -0.21729900 | 2.09476300  |
| C | -3.36419100 | 0.48184200  | 3.25281600  |
| H | -3.41490500 | 1.56997000  | 3.11660000  |
| H | -4.02859700 | 0.19486900  | 4.07239200  |
| H | -2.33195000 | 0.20225600  | 3.50272000  |
| C | 2.04804100  | -1.59415400 | 1.80425900  |
| H | 2.57197600  | -0.77852800 | 2.28076900  |
| H | -1.52177000 | -2.19498300 | 0.89429000  |
| H | 2.42788300  | -2.60582000 | 1.81245300  |
| N | 0.69793500  | -1.48089300 | 1.76750300  |
| O | -0.00408600 | -2.52672400 | 1.50560800  |
| O | 0.14965400  | -0.35565000 | 1.92022000  |
| H | -3.51652200 | -2.97922400 | -2.43827200 |
| C | 6.40828000  | -1.54867200 | 0.25434500  |
| C | 6.35099000  | -2.78707100 | -0.38954600 |
| C | 5.15102600  | -3.26644900 | -0.93103500 |
| C | 4.02071000  | -2.46684700 | -0.80968200 |
| C | 4.05561800  | -1.21652700 | -0.14811600 |
| C | 5.26036900  | -0.75764600 | 0.38347100  |
| N | 2.73440300  | -2.73152500 | -1.29784700 |
| C | 1.88143600  | -1.67861400 | -1.03147200 |
| C | 2.68888800  | -0.64795600 | -0.24233700 |
| O | 0.71447900  | -1.59047000 | -1.38581400 |
| H | 7.34933800  | -1.19666900 | 0.66672200  |
| H | 7.24900700  | -3.39294000 | -0.47562300 |
| H | 5.11195800  | -4.22623000 | -1.43612000 |
| H | 5.29479600  | 0.19078200  | 0.90391200  |
| C | 2.35480100  | -3.91026700 | -2.04794800 |
| H | 2.98432700  | -4.02201500 | -2.93807400 |
| H | 2.44236600  | -4.81380500 | -1.43373100 |
| H | 1.31662600  | -3.78563300 | -2.35900200 |
| N | 2.22248100  | 0.58207300  | -0.23339200 |
| C | 2.79306200  | 1.55316400  | 0.57193200  |
| O | 3.46854000  | 1.35997900  | 1.57966300  |
| O | 2.42535900  | 2.76478400  | 0.11451200  |
| C | 2.80747100  | 4.00930900  | 0.80111300  |
| C | 2.16370400  | 5.08314500  | -0.07929600 |
| H | 2.37878300  | 6.07869000  | 0.32364000  |

|   |            |            |             |
|---|------------|------------|-------------|
| H | 2.55304500 | 5.03137300 | -1.10160400 |
| H | 1.07728700 | 4.95303500 | -0.11979700 |
| C | 4.33144800 | 4.16346300 | 0.80832000  |
| H | 4.80715300 | 3.40494900 | 1.43268900  |
| H | 4.72878800 | 4.08378300 | -0.21008600 |
| H | 4.59803200 | 5.15245900 | 1.19844900  |
| C | 2.20863600 | 4.03814900 | 2.21077600  |
| H | 2.37528000 | 5.02355600 | 2.66146300  |
| H | 1.12766000 | 3.86351000 | 2.16805900  |
| H | 2.66058200 | 3.27987900 | 2.85271000  |

**a-O-gaul-syn-S**

|   |             |             |             |
|---|-------------|-------------|-------------|
| C | -2.59437500 | 0.68583600  | -0.16337700 |
| C | -3.35851300 | -0.05975200 | -1.25953800 |
| C | -2.98374300 | -1.37658400 | -1.67820700 |
| C | -4.46668500 | 0.51932100  | -1.84402700 |
| C | -1.84181300 | -2.06380400 | -1.19489400 |
| C | -3.82546100 | -2.01659900 | -2.65080300 |
| C | -5.21467000 | -0.19748600 | -2.80563000 |
| H | -4.76541600 | 1.52540800  | -1.56975200 |
| C | -1.53801700 | -3.33662900 | -1.65318000 |
| H | -1.16565300 | -1.59540600 | -0.48900700 |
| C | -3.49765300 | -3.33291800 | -3.07738300 |
| H | -6.08982900 | 0.26657100  | -3.25924100 |
| C | -2.38979200 | -3.98083600 | -2.59260800 |
| H | -4.15091200 | -3.80118500 | -3.80768500 |
| H | -2.12858900 | -4.98135700 | -2.92451500 |
| C | -3.10550800 | 0.21380900  | 1.21626600  |
| H | -2.98522800 | -0.87215400 | 1.22511400  |
| C | -4.56638100 | 0.59264400  | 1.56045800  |
| C | -2.47430600 | -0.21795900 | 3.55537200  |
| C | -2.50345200 | 2.11723600  | 2.76935600  |
| C | -4.67068800 | 0.89515200  | 3.06933700  |
| H | -4.87467600 | 1.47172900  | 0.98651600  |
| H | -5.22674700 | -0.23303700 | 1.28055600  |
| C | -3.98974300 | -0.23865700 | 3.86120700  |
| H | -2.06307800 | -1.19441400 | 3.30045900  |
| H | -1.88200100 | 0.19020700  | 4.37676400  |
| C | -3.92791300 | 2.21369900  | 3.35878500  |
| H | -2.38029900 | 2.71471200  | 1.86876100  |
| H | -1.72333300 | 2.38574600  | 3.48436000  |
| H | -5.72178600 | 0.98254100  | 3.36082700  |
| H | -4.15108300 | -0.10738100 | 4.93613400  |
| H | -4.45659000 | 3.05839000  | 2.90556200  |

|   |             |             |             |
|---|-------------|-------------|-------------|
| H | -3.88896900 | 2.39437400  | 4.43883000  |
| O | -0.44731400 | -4.02382200 | -1.24978700 |
| N | -4.92578800 | -1.42377400 | -3.19535200 |
| N | -2.23007900 | 0.68537600  | 2.37022500  |
| H | 0.12940900  | -3.43517700 | -0.70730900 |
| H | -1.52375800 | 0.44670700  | -0.22941000 |
| O | -2.75740300 | 2.09352700  | -0.26140500 |
| C | -1.93118500 | 2.68538300  | -1.26562800 |
| H | -2.21410600 | 2.34681900  | -2.27060600 |
| H | -2.08610100 | 3.76515900  | -1.19711400 |
| H | -0.87310400 | 2.44967200  | -1.09456600 |
| C | 2.46187400  | 0.00221200  | 2.20592100  |
| H | 2.88939700  | 0.98994200  | 2.10378500  |
| H | -1.20431200 | 0.63320200  | 2.11662600  |
| H | 2.96373900  | -0.76184000 | 2.78484600  |
| N | 1.09756700  | -0.01045500 | 2.33503900  |
| O | 0.49453700  | -1.01176100 | 2.79792100  |
| O | 0.44693000  | 0.99576200  | 1.88623900  |
| H | -4.42351600 | -1.20541100 | 3.58328300  |
| C | 6.67823900  | -0.27050700 | 0.38596700  |
| C | 6.87295500  | -1.63919900 | 0.58117400  |
| C | 5.78608200  | -2.52225500 | 0.61949600  |
| C | 4.51410400  | -1.98769100 | 0.45350800  |
| C | 4.29411500  | -0.60689500 | 0.26112500  |
| C | 5.38847600  | 0.25507400  | 0.23000100  |
| N | 3.29422200  | -2.68513400 | 0.44102300  |
| C | 2.24862600  | -1.83324500 | 0.19187900  |
| C | 2.81560100  | -0.41605100 | 0.10316200  |
| O | 1.07226600  | -2.16499900 | 0.05924900  |
| H | 7.53347200  | 0.39876700  | 0.36068400  |
| H | 7.87885100  | -2.03106700 | 0.70555400  |
| H | 5.93714500  | -3.58719400 | 0.76508000  |
| H | 5.23268500  | 1.31840000  | 0.10143900  |
| C | 3.15919500  | -4.11653200 | 0.62610900  |
| H | 2.09613600  | -4.35834100 | 0.65395000  |
| H | 3.63124200  | -4.66463000 | -0.19718100 |
| H | 3.62014200  | -4.42352800 | 1.57099200  |
| N | 2.11670600  | 0.44448600  | -0.62023000 |
| C | 2.51249600  | 1.75132000  | -0.69995200 |
| O | 3.24507100  | 2.36512200  | 0.07967500  |
| O | 1.90447100  | 2.33595000  | -1.76909400 |
| C | 2.18497700  | 3.72472400  | -2.14825800 |
| C | 1.33502400  | 3.90403900  | -3.41008400 |
| H | 1.45670000  | 4.91630000  | -3.81099500 |

|   |            |            |             |
|---|------------|------------|-------------|
| H | 1.63351800 | 3.18799900 | -4.18320200 |
| H | 0.27299500 | 3.74593000 | -3.19130400 |
| C | 3.67141300 | 3.89732700 | -2.48181900 |
| H | 4.29365300 | 3.78034000 | -1.59291900 |
| H | 3.98309500 | 3.15913600 | -3.22976000 |
| H | 3.84413400 | 4.89608500 | -2.89935700 |
| C | 1.72723000 | 4.69235200 | -1.05080100 |
| H | 1.83413800 | 5.72610100 | -1.40066800 |
| H | 0.67151700 | 4.52576000 | -0.80856200 |
| H | 2.31720900 | 4.56522700 | -0.14191300 |

**a-N-gau2-syn-S**

|   |            |             |             |
|---|------------|-------------|-------------|
| C | 3.09872700 | 0.39488900  | 0.52862400  |
| C | 3.66153000 | -0.83989800 | -0.17759300 |
| C | 2.83035900 | -1.75222300 | -0.90997200 |
| C | 5.01958800 | -1.08632900 | -0.12131900 |
| C | 1.41744200 | -1.64485800 | -1.02523100 |
| C | 3.50161500 | -2.85249400 | -1.55172400 |
| C | 5.56765000 | -2.20022000 | -0.79310100 |
| H | 5.66849600 | -0.43417200 | 0.45344400  |
| C | 0.68495100 | -2.59629200 | -1.72883700 |
| H | 0.88088800 | -0.81949800 | -0.57354000 |
| C | 2.72666400 | -3.79174700 | -2.28641600 |
| H | 6.64064700 | -2.38346200 | -0.74738800 |
| C | 1.36543600 | -3.67209000 | -2.37372200 |
| H | 3.25461500 | -4.61058100 | -2.76633800 |
| H | 0.76792400 | -4.39298200 | -2.92388900 |
| C | 3.08140800 | 1.60414700  | -0.43914800 |
| H | 2.69215200 | 1.23948900  | -1.39175800 |
| C | 4.44222400 | 2.32652000  | -0.63082500 |
| C | 1.91294600 | 3.67886900  | -1.10915500 |
| C | 2.40159000 | 3.33825300  | 1.27914700  |
| C | 4.28557200 | 3.82914900  | -0.31644300 |
| H | 5.19068600 | 1.89372400  | 0.03557800  |
| H | 4.79146600 | 2.18748200  | -1.65855100 |
| C | 3.24553800 | 4.44487700  | -1.27085900 |
| H | 1.62310400 | 3.13319800  | -2.00891700 |
| H | 1.07723000 | 4.31612900  | -0.81417500 |
| C | 3.79540500 | 3.99258800  | 1.13666600  |
| H | 2.37121200 | 2.59006700  | 2.06834600  |
| H | 1.60287500 | 4.06247500  | 1.45144300  |
| H | 5.25077900 | 4.32987900  | -0.44141900 |
| H | 3.10365600 | 5.50627500  | -1.04196300 |
| H | 4.50061300 | 3.51310500  | 1.82154000  |

|   |             |             |             |
|---|-------------|-------------|-------------|
| H | 3.74103500  | 5.05363100  | 1.40189800  |
| O | -0.64628400 | -2.58928300 | -1.87155700 |
| N | 4.84724400  | -3.05621900 | -1.49132200 |
| N | 2.05764400  | 2.64964500  | -0.01383300 |
| H | -1.12088300 | -1.91171600 | -1.30883500 |
| H | 2.06532700  | 0.19235200  | 0.84290000  |
| O | 3.87117000  | 0.75990600  | 1.66705100  |
| C | 3.66665600  | -0.07396900 | 2.80321200  |
| H | 3.93658600  | -1.11721000 | 2.59762700  |
| H | 4.31744400  | 0.31211900  | 3.59236500  |
| H | 2.62365600  | -0.03378600 | 3.14582000  |
| C | -2.18762000 | 1.66967700  | -1.47621900 |
| H | -2.95311600 | 2.42871700  | -1.57299000 |
| H | 1.12608200  | 2.15991100  | 0.04218900  |
| H | -1.85890800 | 1.12227700  | -2.34823400 |
| N | -1.16471000 | 2.01308200  | -0.63463100 |
| O | -0.13468700 | 1.24873500  | -0.63543600 |
| O | -1.24143000 | 2.98335600  | 0.15704700  |
| H | 3.59281600  | 4.37859700  | -2.30703500 |
| C | -5.38350100 | 1.84729100  | 1.98346200  |
| C | -6.52706300 | 1.83015300  | 1.18385700  |
| C | -6.50726000 | 1.24125700  | -0.08719300 |
| C | -5.31580800 | 0.66938400  | -0.51783200 |
| C | -4.15299800 | 0.65169000  | 0.28697200  |
| C | -4.18853600 | 1.26528300  | 1.53823400  |
| N | -5.07380500 | 0.05781800  | -1.75465500 |
| C | -3.77313900 | -0.39423800 | -1.84305300 |
| C | -3.08880000 | -0.04082700 | -0.50619500 |
| O | -3.28340800 | -0.97249500 | -2.79709600 |
| H | -5.41407900 | 2.31983000  | 2.96115400  |
| H | -7.44752900 | 2.28219700  | 1.54407300  |
| H | -7.39315700 | 1.23603000  | -0.71431200 |
| H | -3.29808300 | 1.28114900  | 2.15020300  |
| C | -6.05276700 | -0.10851100 | -2.80933900 |
| H | -6.90736300 | -0.69714000 | -2.45691100 |
| H | -6.41282500 | 0.86352300  | -3.16642900 |
| H | -5.56596600 | -0.63657400 | -3.63084700 |
| N | -2.14219200 | -0.90488200 | -0.14751200 |
| C | -1.70952500 | -1.03198200 | 1.15790700  |
| O | -1.73308900 | -0.20616700 | 2.06270900  |
| O | -1.20703300 | -2.28810000 | 1.29523900  |
| C | -0.83987400 | -2.84023100 | 2.60388000  |
| C | -0.43878100 | -4.27730300 | 2.25820800  |
| H | -0.12437000 | -4.81159100 | 3.16161500  |

|   |             |             |            |
|---|-------------|-------------|------------|
| H | -1.27967300 | -4.81815500 | 1.81114100 |
| H | 0.39094900  | -4.28599000 | 1.54371700 |
| C | -2.05475900 | -2.83341300 | 3.53840100 |
| H | -2.35356500 | -1.81601600 | 3.79785600 |
| H | -2.90344800 | -3.33911900 | 3.06376000 |
| H | -1.81401900 | -3.37262200 | 4.46179600 |
| C | 0.35060600  | -2.08262300 | 3.19976400 |
| H | 0.67603000  | -2.57395200 | 4.12436300 |
| H | 1.19184100  | -2.09134800 | 2.49871700 |
| H | 0.08485500  | -1.04862300 | 3.42704100 |

**a-O-gau2-syn-S**

|   |             |             |             |
|---|-------------|-------------|-------------|
| C | 2.46623500  | -0.92277300 | -0.53634600 |
| C | 3.69580300  | -0.09187800 | -0.90973800 |
| C | 3.67086800  | 1.33424700  | -0.79759100 |
| C | 4.86430900  | -0.68815200 | -1.33231000 |
| C | 2.53877000  | 2.05878400  | -0.35524500 |
| C | 4.87102800  | 2.04709800  | -1.12056600 |
| C | 5.98823100  | 0.11357900  | -1.64750900 |
| H | 4.92678200  | -1.76707000 | -1.42598400 |
| C | 2.59709900  | 3.42965600  | -0.17746700 |
| H | 1.60721900  | 1.55636200  | -0.12625700 |
| C | 4.88200100  | 3.46266600  | -0.97547200 |
| H | 6.90549100  | -0.36417700 | -1.98982500 |
| C | 3.78206000  | 4.14124800  | -0.50820000 |
| H | 5.79826300  | 3.98704900  | -1.23018300 |
| H | 3.79734700  | 5.21896400  | -0.37582900 |
| C | 2.28811700  | -0.92821600 | 0.99829500  |
| H | 2.40967700  | 0.10344300  | 1.32838500  |
| C | 3.26198500  | -1.83642600 | 1.78266900  |
| C | 0.66282500  | -0.72581800 | 2.83276800  |
| C | 0.63659900  | -2.77869900 | 1.45224100  |
| C | 2.53963300  | -2.37928700 | 3.03335900  |
| H | 3.59720000  | -2.66743500 | 1.15475400  |
| H | 4.14450600  | -1.25208600 | 2.05985000  |
| C | 1.81167800  | -1.21852700 | 3.74043200  |
| H | 0.62499900  | 0.35971400  | 2.72953200  |
| H | -0.32133200 | -1.07847600 | 3.14137400  |
| C | 1.48646000  | -3.40678400 | 2.57771800  |
| H | 0.92355900  | -3.13629300 | 0.46680200  |
| H | -0.43578100 | -2.91099600 | 1.58250800  |
| H | 3.26155000  | -2.84542900 | 3.71070800  |
| H | 1.40104900  | -1.55186600 | 4.69910600  |
| H | 1.97112900  | -4.31477200 | 2.20404800  |



|   |             |             |             |
|---|-------------|-------------|-------------|
| H | 0.85448800  | -3.69886300 | 3.42399500  |
| O | 1.55085100  | 4.13458900  | 0.31472100  |
| N | 6.00922400  | 1.42850100  | -1.54806100 |
| N | 0.87090400  | -1.28249900 | 1.43841600  |
| H | 0.86451000  | 3.49733600  | 0.62454900  |
| H | 1.57683200  | -0.44727200 | -0.97641200 |
| O | 2.55568000  | -2.25936900 | -1.00346500 |
| C | 2.19904800  | -2.40308300 | -2.37658300 |
| H | 2.85792900  | -1.81967600 | -3.03259100 |
| H | 2.30794900  | -3.46344100 | -2.61768100 |
| H | 1.16061200  | -2.09204700 | -2.54430300 |
| C | -3.03738900 | 0.50866700  | 2.14086500  |
| H | -3.94125700 | 1.10113100  | 2.15148300  |
| H | 0.15282100  | -0.84678400 | 0.80904800  |
| H | -2.23922000 | 0.72446400  | 2.83822200  |
| N | -3.22990500 | -0.83032500 | 1.88932400  |
| O | -2.28021200 | -1.63070300 | 2.12719200  |
| O | -4.28332000 | -1.21379400 | 1.32154200  |
| H | 2.51474000  | -0.40542900 | 3.95376900  |
| C | -5.60185200 | 1.74967200  | -1.40524600 |
| C | -5.57149300 | 3.11093500  | -1.09620200 |
| C | -4.45888400 | 3.67762800  | -0.46118000 |
| C | -3.39332700 | 2.83812100  | -0.16451600 |
| C | -3.38849200 | 1.46633400  | -0.49341500 |
| C | -4.51578700 | 0.91877900  | -1.10525200 |
| N | -2.20946800 | 3.17711100  | 0.51603700  |
| C | -1.39210800 | 2.08972400  | 0.64403600  |
| C | -2.10497600 | 0.90264400  | 0.01556100  |
| O | -0.25194200 | 2.11803100  | 1.13284600  |
| H | -6.47735900 | 1.32535500  | -1.88816000 |
| H | -6.41943900 | 3.74291200  | -1.34589500 |
| H | -4.43674100 | 4.73320800  | -0.21010000 |
| H | -4.55076000 | -0.13182300 | -1.35071600 |
| C | -1.90437900 | 4.49869500  | 1.03195400  |
| H | -1.65857700 | 5.19313400  | 0.22097200  |
| H | -2.76224100 | 4.88734200  | 1.58926800  |
| H | -1.05219600 | 4.41884800  | 1.70782900  |
| N | -1.39014700 | -0.16351700 | -0.29883800 |
| C | -1.84837400 | -1.05455400 | -1.26647800 |
| O | -2.51003100 | -0.77502400 | -2.25487800 |
| O | -1.35291100 | -2.29607400 | -1.02423200 |
| C | -1.95051200 | -3.46981300 | -1.69823700 |
| C | -1.27295200 | -4.65376700 | -1.00413900 |
| H | -1.62394600 | -5.59173000 | -1.44768100 |

|   |             |             |             |
|---|-------------|-------------|-------------|
| H | -0.18477900 | -4.61017000 | -1.12277700 |
| H | -1.51014500 | -4.67150400 | 0.06421600  |
| C | -1.62253400 | -3.47407700 | -3.19461600 |
| H | -2.04782700 | -2.60250400 | -3.69321500 |
| H | -0.53916600 | -3.48344100 | -3.35808100 |
| H | -2.03633900 | -4.37927500 | -3.65517700 |
| C | -3.46108000 | -3.49962300 | -1.43360700 |
| H | -3.85228700 | -4.49859900 | -1.65800200 |
| H | -3.66697000 | -3.26867100 | -0.38298400 |
| H | -3.99312900 | -2.77757100 | -2.05639000 |

**a-N-gau1-syn-R**

|   |             |             |             |
|---|-------------|-------------|-------------|
| C | -2.97534000 | -0.97730100 | -0.35421100 |
| C | -3.42877100 | -1.03279300 | 1.10403500  |
| C | -2.56948500 | -0.60729200 | 2.16853900  |
| C | -4.69644100 | -1.47588100 | 1.42173700  |
| C | -1.22906500 | -0.18370400 | 1.98281000  |
| C | -3.11509800 | -0.64664200 | 3.49774000  |
| C | -5.12976700 | -1.46939400 | 2.76704900  |
| H | -5.35955600 | -1.83806000 | 0.64318800  |
| C | -0.43617400 | 0.15318900  | 3.07066800  |
| H | -0.77561900 | -0.17530900 | 0.99924200  |
| C | -2.28960400 | -0.24987200 | 4.58535400  |
| H | -6.13569500 | -1.81097700 | 3.00934900  |
| C | -0.98938900 | 0.13694300  | 4.38329300  |
| H | -2.72113500 | -0.27948400 | 5.58160200  |
| H | -0.34877700 | 0.42146700  | 5.21303600  |
| C | -3.25663800 | 0.43728300  | -0.91486600 |
| H | -2.88871300 | 1.14478400  | -0.16824500 |
| C | -4.73988200 | 0.72945900  | -1.26155300 |
| C | -2.44635300 | 2.23958600  | -2.39457500 |
| C | -2.89765400 | 0.02670000  | -3.37930800 |
| C | -4.81936400 | 1.46186700  | -2.61576400 |
| H | -5.29969100 | -0.20719000 | -1.32017100 |
| H | -5.18685600 | 1.33655300  | -0.46868400 |
| C | -3.90959800 | 2.70420300  | -2.57487800 |
| H | -1.94851500 | 2.71030400  | -1.54443200 |
| H | -1.83450200 | 2.40966800  | -3.28283400 |
| C | -4.32447900 | 0.51291800  | -3.72580300 |
| H | -2.85787900 | -1.03501700 | -3.15058700 |
| H | -2.16951400 | 0.24828700  | -4.16232800 |
| H | -5.85347300 | 1.76079700  | -2.81350500 |
| H | -4.00665200 | 3.28013900  | -3.50090100 |
| H | -4.99621000 | -0.34697300 | -3.81280000 |

|   |             |             |             |
|---|-------------|-------------|-------------|
| H | -4.32924500 | 1.03046000  | -4.69134000 |
| O | 0.85730700  | 0.50117300  | 2.97040400  |
| N | -4.38315900 | -1.06370500 | 3.77585000  |
| N | -2.42175000 | 0.75173300  | -2.14681200 |
| H | 1.18813000  | 0.44427500  | 2.03127500  |
| H | -1.89621800 | -1.16474800 | -0.41481100 |
| O | -3.64964600 | -1.93226200 | -1.16559700 |
| C | -3.11782300 | -3.25042900 | -1.03892900 |
| H | -3.23838500 | -3.63923900 | -0.01934300 |
| H | -3.68363400 | -3.88190900 | -1.72929100 |
| H | -2.05383000 | -3.27356900 | -1.30755800 |
| C | 2.05232200  | -0.70531700 | -2.23721400 |
| H | 2.36350300  | -1.65807800 | -2.64254100 |
| H | -1.40693100 | 0.50718900  | -1.97042800 |
| H | 2.61395100  | 0.20030700  | -2.41192400 |
| N | 0.70799000  | -0.53520400 | -2.14008300 |
| O | 0.27143600  | 0.63361400  | -1.83617400 |
| O | -0.09634000 | -1.49853500 | -2.27253800 |
| H | -4.20562600 | 3.36093300  | -1.74999800 |
| C | 6.49954500  | -0.88902100 | -0.94816500 |
| C | 6.57880100  | -2.28144500 | -0.86736900 |
| C | 5.45397600  | -3.05185000 | -0.54724900 |
| C | 4.25618200  | -2.38584500 | -0.31097900 |
| C | 4.15319500  | -0.97649900 | -0.39866100 |
| C | 5.28640900  | -0.22888900 | -0.71814900 |
| N | 3.02669500  | -2.95044400 | 0.04170700  |
| C | 2.07559100  | -1.96767700 | 0.25472700  |
| C | 2.74947900  | -0.62869400 | -0.05451600 |
| O | 0.92966000  | -2.15369500 | 0.62608500  |
| H | 7.38422000  | -0.31026000 | -1.19759100 |
| H | 7.52573800  | -2.78093400 | -1.05446100 |
| H | 5.51952100  | -4.13307000 | -0.47936200 |
| H | 5.21562400  | 0.84783100  | -0.80156300 |
| C | 2.76994800  | -4.36496900 | 0.21387600  |
| H | 3.40898800  | -4.78617700 | 0.99863700  |
| H | 1.72406400  | -4.47548100 | 0.50498400  |
| H | 2.94482100  | -4.91136400 | -0.72020100 |
| N | 2.19571400  | 0.44617300  | 0.47649600  |
| C | 2.63474600  | 1.70954200  | 0.13417400  |
| O | 3.29910400  | 2.02064400  | -0.85145800 |
| O | 2.15275000  | 2.58998300  | 1.03855500  |
| C | 2.39612700  | 4.03366500  | 0.92624300  |
| C | 1.65800000  | 4.58911700  | 2.14705300  |
| H | 1.76917700  | 5.67783500  | 2.19404200  |

|   |            |            |             |
|---|------------|------------|-------------|
| H | 0.58995300 | 4.35130100 | 2.09716000  |
| H | 2.05906800 | 4.15880900 | 3.07062300  |
| C | 1.78104300 | 4.57634500 | -0.36823200 |
| H | 2.29851600 | 4.18879200 | -1.24741000 |
| H | 0.72289300 | 4.29737800 | -0.43223400 |
| H | 1.84349700 | 5.67076500 | -0.37617400 |
| C | 3.89638900 | 4.32924300 | 1.02521300  |
| H | 4.05768100 | 5.41288500 | 1.06243000  |
| H | 4.31167700 | 3.89367700 | 1.94116800  |
| H | 4.43806200 | 3.92689000 | 0.16711200  |

**a-N-gau1-syn-R-Boc-rotator**

|   |             |             |             |
|---|-------------|-------------|-------------|
| C | -3.04266200 | -0.24538500 | -0.85296300 |
| C | -3.64385800 | -1.30500800 | 0.07085600  |
| C | -2.88566200 | -1.86736600 | 1.14771900  |
| C | -4.94827300 | -1.72209900 | -0.09934300 |
| C | -1.52562600 | -1.56002000 | 1.39767000  |
| C | -3.55879700 | -2.81352800 | 1.99405400  |
| C | -5.51153000 | -2.65953900 | 0.79691600  |
| H | -5.54161200 | -1.33908600 | -0.92304100 |
| C | -0.83327900 | -2.18906300 | 2.42195000  |
| H | -0.97747500 | -0.88742600 | 0.75077200  |
| C | -2.83268500 | -3.40688100 | 3.06313300  |
| H | -6.54506200 | -2.97717800 | 0.66176600  |
| C | -1.51025500 | -3.10827900 | 3.27391200  |
| H | -3.35870400 | -4.11453200 | 3.69738000  |
| H | -0.94721600 | -3.57286200 | 4.07819500  |
| C | -3.18913000 | 1.14099400  | -0.18417500 |
| H | -2.83151500 | 1.02951500  | 0.84200300  |
| C | -4.62266800 | 1.73182700  | -0.20171700 |
| C | -2.15885100 | 3.35503800  | 0.17476200  |
| C | -2.69556900 | 2.67375500  | -2.13299200 |
| C | -4.55901600 | 3.23463200  | -0.53853500 |
| H | -5.22903000 | 1.21605300  | -0.95070100 |
| H | -5.09268900 | 1.57375000  | 0.77351600  |
| C | -3.57325000 | 3.92788400  | 0.42077800  |
| H | -1.68074300 | 2.98579900  | 1.08392700  |
| H | -1.48481300 | 4.07406900  | -0.29524500 |
| C | -4.05298200 | 3.39952600  | -1.98515700 |
| H | -2.75281400 | 1.79819200  | -2.77462500 |
| H | -1.89966500 | 3.32793000  | -2.49487200 |
| H | -5.55447100 | 3.67828300  | -0.43875700 |
| H | -3.57099500 | 5.00976600  | 0.25331500  |
| H | -4.77684100 | 2.97441900  | -2.68762300 |

|   |             |             |             |
|---|-------------|-------------|-------------|
| H | -3.94753400 | 4.46292000  | -2.22661000 |
| O | 0.47220100  | -1.98780600 | 2.66634700  |
| N | -4.85792700 | -3.18662500 | 1.81427100  |
| N | -2.25269600 | 2.18617600  | -0.77641700 |
| H | 0.87121800  | -1.35043600 | 2.01244300  |
| H | -1.97472000 | -0.44852000 | -1.00360100 |
| O | -3.68514900 | -0.21063200 | -2.12175100 |
| C | -3.23852500 | -1.23848700 | -3.00502300 |
| H | -3.47555800 | -2.23740900 | -2.61667600 |
| H | -3.76881100 | -1.08936800 | -3.94958900 |
| H | -2.15676200 | -1.16844000 | -3.17721600 |
| C | 2.15109900  | 0.72966600  | -1.83287900 |
| H | 2.42353100  | 0.26239900  | -2.76987500 |
| H | -1.27204200 | 1.80825000  | -0.85911500 |
| H | 2.80305800  | 1.45150200  | -1.36604300 |
| N | 0.81864300  | 1.01980000  | -1.71871000 |
| O | 0.44719200  | 1.74360000  | -0.73173300 |
| O | -0.03297000 | 0.52476300  | -2.50155600 |
| H | -3.87671200 | 3.75890100  | 1.45927200  |
| C | 6.35398400  | -0.90693500 | -0.57786400 |
| C | 6.37129500  | -1.95534000 | -1.50089400 |
| C | 5.18151400  | -2.53946500 | -1.95207600 |
| C | 3.98242900  | -2.04012000 | -1.45311100 |
| C | 3.94321200  | -0.96262900 | -0.53765300 |
| C | 5.13980500  | -0.40688700 | -0.09112900 |
| N | 2.69189600  | -2.49988000 | -1.72865500 |
| C | 1.75214200  | -1.81625700 | -0.97508900 |
| C | 2.50946100  | -0.73046000 | -0.19933700 |
| O | 0.55642000  | -2.05079500 | -0.95030200 |
| H | 7.28848800  | -0.47482300 | -0.23180900 |
| H | 7.32038700  | -2.33143700 | -1.87345300 |
| H | 5.19706100  | -3.36483400 | -2.65679600 |
| H | 5.12702000  | 0.40772300  | 0.62101900  |
| C | 2.36521000  | -3.60915100 | -2.60045900 |
| H | 2.84113100  | -4.53365900 | -2.25310400 |
| H | 1.28146300  | -3.73492200 | -2.57970000 |
| H | 2.68646600  | -3.40710800 | -3.62861300 |
| N | 1.92432600  | -0.28651100 | 0.90263700  |
| C | 2.36848500  | 0.74774600  | 1.69468400  |
| O | 2.00680900  | 0.87695100  | 2.85560400  |
| O | 3.17568000  | 1.64201600  | 1.04972700  |
| C | 3.53469700  | 2.93043800  | 1.66933900  |
| C | 4.33929800  | 3.62709300  | 0.56808800  |
| H | 4.69643800  | 4.60066700  | 0.92154000  |

|   |            |            |             |
|---|------------|------------|-------------|
| H | 5.21025300 | 3.02916900 | 0.27857300  |
| H | 3.72353600 | 3.79202100 | -0.32288400 |
| C | 4.40597900 | 2.70331300 | 2.90897300  |
| H | 3.85124500 | 2.17966500 | 3.68886000  |
| H | 5.29565200 | 2.11503500 | 2.65524800  |
| H | 4.74455000 | 3.66836500 | 3.30414700  |
| C | 2.26674000 | 3.72938500 | 1.98884100  |
| H | 2.53799200 | 4.74891700 | 2.28691500  |
| H | 1.62708900 | 3.78663200 | 1.10135200  |
| H | 1.70168500 | 3.26624300 | 2.79945200  |

**a-N-gau1-anti-R**

|   |            |             |             |
|---|------------|-------------|-------------|
| C | 3.06901900 | -0.94992300 | -0.28720400 |
| C | 3.50393800 | -0.07277200 | -1.46235900 |
| C | 2.60658700 | 0.85470700  | -2.08369400 |
| C | 4.79647700 | -0.15514900 | -1.94051600 |
| C | 1.24413900 | 1.00468800  | -1.72007700 |
| C | 3.13749400 | 1.64803100  | -3.15914700 |
| C | 5.21336500 | 0.68211600  | -2.99953700 |
| H | 5.49193500 | -0.86968400 | -1.51324200 |
| C | 0.41893400 | 1.87712200  | -2.41557300 |
| H | 0.80208400 | 0.39526400  | -0.94181100 |
| C | 2.27389000 | 2.56157200  | -3.82364800 |
| H | 6.23802900 | 0.61756100  | -3.36437400 |
| C | 0.95453200 | 2.67415100  | -3.46822900 |
| H | 2.69419800 | 3.15568200  | -4.62986300 |
| H | 0.28635400 | 3.35802100  | -3.98364800 |
| C | 3.23847800 | -0.16405400 | 1.03217000  |
| H | 2.70735400 | 0.78092900  | 0.89382800  |
| C | 4.69882400 | 0.09707500  | 1.47667800  |
| C | 2.31104500 | 0.21524300  | 3.28222300  |
| C | 3.25982100 | -1.99800700 | 2.77329000  |
| C | 4.79478800 | -0.02674800 | 3.01126700  |
| H | 5.37201200 | -0.62630000 | 1.00775500  |
| H | 5.00318100 | 1.09460300  | 1.14664100  |
| C | 3.68255300 | 0.82222200  | 3.65698800  |
| H | 1.59901600 | 0.94324000  | 2.89559900  |
| H | 1.83815800 | -0.30586300 | 4.11720300  |
| C | 4.58286500 | -1.50314800 | 3.40039600  |
| H | 3.42091500 | -2.69052900 | 1.95031300  |
| H | 2.58716200 | -2.45816000 | 3.50013000  |
| H | 5.77740500 | 0.31447300  | 3.35144400  |
| H | 3.79454900 | 0.84027900  | 4.74594300  |
| H | 5.41470200 | -2.11536400 | 3.03722200  |

|   |             |             |             |
|---|-------------|-------------|-------------|
| H | 4.55496800  | -1.60464700 | 4.49093700  |
| O | -0.89208000 | 2.02671800  | -2.16600900 |
| N | 4.42719600  | 1.56006700  | -3.59176200 |
| N | 2.51247500  | -0.81773600 | 2.20118200  |
| H | -1.21033700 | 1.44038300  | -1.42508300 |
| H | 2.00766400  | -1.21138300 | -0.39447400 |
| O | 3.83482600  | -2.14764100 | -0.20559200 |
| C | 3.41315200  | -3.15210300 | -1.12516900 |
| H | 3.52735600  | -2.82450400 | -2.16641100 |
| H | 4.05261200  | -4.02187300 | -0.95263100 |
| H | 2.36452000  | -3.43141200 | -0.95290800 |
| C | -2.07375900 | -1.71928800 | 1.67939000  |
| H | -2.20269000 | -2.78533200 | 1.55376100  |
| H | 1.56418600  | -1.17379500 | 1.88882000  |
| H | -2.80274300 | -1.11079700 | 2.19301700  |
| N | -0.79057800 | -1.29505400 | 1.80832900  |
| O | -0.55466800 | -0.09506700 | 2.11363100  |
| O | 0.17803600  | -2.09754800 | 1.53827800  |
| H | 3.74993900  | 1.85814300  | 3.30723200  |
| C | -6.42183400 | -1.67847400 | -0.03681800 |
| C | -6.30805000 | -2.87144600 | -0.75452300 |
| C | -5.07204700 | -3.29569100 | -1.25797400 |
| C | -3.96326500 | -2.49121700 | -1.01885900 |
| C | -4.05494400 | -1.28628200 | -0.28203900 |
| C | -5.29661300 | -0.88208200 | 0.20824300  |
| N | -2.65297900 | -2.70182500 | -1.46065100 |
| C | -1.83716200 | -1.64312600 | -1.10495300 |
| C | -2.69518600 | -0.68379400 | -0.27642400 |
| O | -0.66323100 | -1.51637400 | -1.41278100 |
| H | -7.39029400 | -1.36602200 | 0.34300200  |
| H | -7.18960600 | -3.48198200 | -0.93121700 |
| H | -4.98666000 | -4.21736700 | -1.82454900 |
| H | -5.37794500 | 0.03162300  | 0.78215500  |
| C | -2.20833200 | -3.82567100 | -2.25773500 |
| H | -2.33856900 | -4.76817900 | -1.71363200 |
| H | -2.76374300 | -3.87981500 | -3.20132900 |
| H | -1.14906600 | -3.67736300 | -2.47343700 |
| N | -2.26141000 | 0.55842100  | -0.17067000 |
| C | -2.88586700 | 1.44755500  | 0.68615700  |
| O | -3.64802300 | 1.17312500  | 1.60923100  |
| O | -2.47440700 | 2.69612900  | 0.38161900  |
| C | -2.89749200 | 3.86815900  | 1.15879500  |
| C | -2.16908200 | 5.01311800  | 0.44961800  |
| H | -2.40384800 | 5.96850100  | 0.93133700  |

|   |             |            |             |
|---|-------------|------------|-------------|
| H | -1.08472200 | 4.86345100 | 0.48614500  |
| H | -2.46888000 | 5.07026100 | -0.60197600 |
| C | -2.41819400 | 3.74094800 | 2.60862800  |
| H | -2.92770900 | 2.92633400 | 3.12620400  |
| H | -1.33905800 | 3.55192300 | 2.63648800  |
| H | -2.61351300 | 4.67630400 | 3.14612900  |
| C | -4.41551700 | 4.05277100 | 1.06112500  |
| H | -4.70321600 | 4.99889300 | 1.53411800  |
| H | -4.72943000 | 4.08951200 | 0.01169000  |
| H | -4.94813600 | 3.24012900 | 1.55852600  |

**a-O-gau1-syn-R**

|   |             |             |             |
|---|-------------|-------------|-------------|
| C | -3.05255600 | -0.83402600 | 1.00431900  |
| C | -4.27746700 | -0.01539500 | 0.59642500  |
| C | -4.13722400 | 1.20815000  | -0.13525600 |
| C | -5.54994800 | -0.44814600 | 0.90436600  |
| C | -2.88716900 | 1.75907500  | -0.51852900 |
| C | -5.34328000 | 1.89069000  | -0.50765600 |
| C | -6.67101800 | 0.31495100  | 0.50171000  |
| H | -5.69345300 | -1.36953200 | 1.45846500  |
| C | -2.82996100 | 2.91156900  | -1.28469400 |
| H | -1.95483300 | 1.30753500  | -0.19828900 |
| C | -5.24390200 | 3.09299200  | -1.26096400 |
| H | -7.67277800 | -0.03027000 | 0.75543600  |
| C | -4.02488900 | 3.58850600  | -1.65124600 |
| H | -6.16808300 | 3.59759400  | -1.52664000 |
| H | -3.94530600 | 4.49782400  | -2.23956400 |
| C | -2.45839700 | -1.54352700 | -0.23042800 |
| H | -2.34145700 | -0.77843000 | -0.99941300 |
| C | -3.25979900 | -2.73363500 | -0.80258000 |
| C | -0.34353000 | -2.15181700 | -1.32496900 |
| C | -0.98694100 | -3.35514800 | 0.73631800  |
| C | -2.26760100 | -3.77087000 | -1.37223600 |
| H | -3.87169300 | -3.19324300 | -0.02016200 |
| H | -3.93540800 | -2.36826000 | -1.58157400 |
| C | -1.21162300 | -3.05016100 | -2.23721100 |
| H | -0.21017900 | -1.13885600 | -1.70701600 |
| H | 0.64881200  | -2.56044000 | -1.12988700 |
| C | -1.54785800 | -4.45290600 | -0.19312000 |
| H | -1.57872300 | -3.23047800 | 1.64127900  |
| H | 0.05698300  | -3.51613300 | 1.01153200  |
| H | -2.80329200 | -4.51422400 | -1.97028800 |
| H | -0.57365500 | -3.77945900 | -2.74689300 |
| H | -2.24175400 | -5.08839500 | 0.36659100  |



|   |             |             |             |
|---|-------------|-------------|-------------|
| H | -0.74203100 | -5.09575200 | -0.56463400 |
| O | -1.66538200 | 3.44473900  | -1.72038800 |
| N | -6.58887300 | 1.43986600  | -0.18100400 |
| N | -1.03432600 | -2.02867100 | 0.01300900  |
| H | -0.90697100 | 2.86420400  | -1.46214900 |
| H | -2.28436100 | -0.15279800 | 1.39688900  |
| O | -3.36012500 | -1.81016400 | 1.99346900  |
| C | -3.33527100 | -1.29600300 | 3.32405800  |
| H | -4.07561300 | -0.49836200 | 3.46732600  |
| H | -3.57893600 | -2.13124600 | 3.98599800  |
| H | -2.33981200 | -0.90855400 | 3.57937100  |
| C | 1.85927400  | 1.13216800  | 2.00302600  |
| H | 1.81947000  | 2.16593200  | 2.32071700  |
| H | -0.50068400 | -1.34641000 | 0.61069200  |
| H | 2.64748800  | 0.47737600  | 2.34682500  |
| N | 0.63410100  | 0.52820200  | 1.89510300  |
| O | 0.61336100  | -0.74173400 | 1.76377200  |
| O | -0.42094300 | 1.20954000  | 1.82996500  |
| H | -1.70244400 | -2.45169200 | -3.01256400 |
| C | 6.04435800  | 2.64362200  | 0.82935600  |
| C | 5.68203000  | 3.96772700  | 0.57407700  |
| C | 4.38617700  | 4.29002900  | 0.15137200  |
| C | 3.47960000  | 3.24801500  | -0.00371900 |
| C | 3.82387500  | 1.90378000  | 0.25060800  |
| C | 5.11764700  | 1.60442200  | 0.67449800  |
| N | 2.14280900  | 3.34294500  | -0.42926200 |
| C | 1.58121300  | 2.09652100  | -0.54744800 |
| C | 2.61154000  | 1.07887100  | -0.05011300 |
| O | 0.45957500  | 1.84375600  | -0.98884800 |
| H | 7.05394700  | 2.41323800  | 1.15757700  |
| H | 6.41117800  | 4.76334000  | 0.70150500  |
| H | 4.10624600  | 5.31795900  | -0.05517800 |
| H | 5.38942600  | 0.57998500  | 0.89265800  |
| C | 1.48181700  | 4.59704100  | -0.74064000 |
| H | 1.87232700  | 5.02861500  | -1.66972000 |
| H | 0.41242400  | 4.42186900  | -0.85119000 |
| H | 1.63610000  | 5.30963800  | 0.07564200  |
| N | 2.47750500  | -0.15614600 | -0.50941200 |
| C | 3.31027200  | -1.14861000 | -0.06957200 |
| O | 4.00292800  | -1.16124700 | 0.94876000  |
| O | 3.21834700  | -2.21243200 | -0.92065100 |
| C | 4.05565300  | -3.40476600 | -0.74893800 |
| C | 3.66824400  | -4.26466100 | -1.95597600 |
| H | 4.23277900  | -5.20344100 | -1.95018300 |

|   |            |             |             |
|---|------------|-------------|-------------|
| H | 2.59984000 | -4.50802200 | -1.93608800 |
| H | 3.88216700 | -3.73880600 | -2.89264800 |
| C | 3.70935600 | -4.12744300 | 0.55768500  |
| H | 3.94143100 | -3.50629800 | 1.42398200  |
| H | 2.64361000 | -4.38464700 | 0.58448500  |
| H | 4.28126800 | -5.06023400 | 0.62822900  |
| C | 5.54128700 | -3.03276100 | -0.82370800 |
| H | 6.14875500 | -3.94437400 | -0.86014200 |
| H | 5.74376100 | -2.45550800 | -1.73320400 |
| H | 5.84938900 | -2.44380200 | 0.04165900  |

**a-O-gau1-anti-R**

|   |             |             |             |
|---|-------------|-------------|-------------|
| C | -3.37879700 | -0.65242300 | 1.08251400  |
| C | -4.51511500 | 0.12664100  | 0.42318100  |
| C | -4.24313000 | 1.25957900  | -0.40989500 |
| C | -5.82705200 | -0.26186500 | 0.59235600  |
| C | -2.93956500 | 1.75991100  | -0.66508900 |
| C | -5.36889100 | 1.89820100  | -1.02927400 |
| C | -6.86204400 | 0.45385600  | -0.05345600 |
| H | -6.06711400 | -1.11405300 | 1.21905700  |
| C | -2.74975000 | 2.82325700  | -1.53285700 |
| H | -2.06724400 | 1.32450200  | -0.18954000 |
| C | -5.13810500 | 3.00781100  | -1.88879100 |
| H | -7.89696700 | 0.14437100  | 0.08781800  |
| C | -3.86683800 | 3.45669500  | -2.14346400 |
| H | -6.00390100 | 3.47933400  | -2.34410000 |
| H | -3.68496100 | 4.29435100  | -2.81010500 |
| C | -2.64480400 | -1.50447900 | 0.02438300  |
| H | -2.43210600 | -0.83978100 | -0.81420000 |
| C | -3.38709500 | -2.76009000 | -0.48326900 |
| C | -0.41953400 | -2.23704800 | -0.72247400 |
| C | -1.31390000 | -3.16543200 | 1.38201000  |
| C | -2.34252000 | -3.85407900 | -0.79655600 |
| H | -4.09024700 | -3.12071000 | 0.27384700  |
| H | -3.96341500 | -2.49792500 | -1.37551900 |
| C | -1.19012600 | -3.23544800 | -1.61681600 |
| H | -0.21100800 | -1.28172800 | -1.20650500 |
| H | 0.52690600  | -2.62903300 | -0.35237600 |
| C | -1.77116300 | -4.37480400 | 0.53765900  |
| H | -2.00821200 | -2.93504300 | 2.18851200  |
| H | -0.30944300 | -3.27392900 | 1.79236200  |
| H | -2.81023100 | -4.67101600 | -1.35426800 |
| H | -0.50621200 | -4.01512500 | -1.96723500 |
| H | -2.53142200 | -4.93900400 | 1.08750000  |

|   |             |             |             |
|---|-------------|-------------|-------------|
| H | -0.93260300 | -5.05388100 | 0.34882900  |
| O | -1.52728200 | 3.30730800  | -1.84594700 |
| N | -6.65697900 | 1.49172800  | -0.84025300 |
| N | -1.26636400 | -1.94370300 | 0.49565800  |
| H | -0.82023200 | 2.75080900  | -1.43183200 |
| H | -2.65667000 | 0.06549500  | 1.49647500  |
| O | -3.83482900 | -1.50240700 | 2.12559700  |
| C | -3.99862400 | -0.83625200 | 3.37550500  |
| H | -4.72977100 | -0.02012900 | 3.31118400  |
| H | -4.36362200 | -1.58509400 | 4.08323100  |
| H | -3.04199700 | -0.43358300 | 3.73663500  |
| C | 2.08900800  | 0.77780600  | 2.08431700  |
| H | 1.74814000  | 1.72740600  | 2.47791900  |
| H | -0.81517400 | -1.16650800 | 1.03960400  |
| H | 3.02555000  | 0.36234800  | 2.42903600  |
| N | 1.09767300  | -0.17107300 | 1.97131300  |
| O | 1.42495100  | -1.36137600 | 1.75424300  |
| O | -0.12902100 | 0.18389700  | 1.94488900  |
| H | -1.58825300 | -2.73132000 | -2.50433300 |
| C | 6.04128100  | 2.80403700  | 0.97810900  |
| C | 5.56991600  | 4.11435500  | 0.88320100  |
| C | 4.23416300  | 4.37268500  | 0.55073300  |
| C | 3.40418300  | 3.28214500  | 0.31902800  |
| C | 3.85718400  | 1.95076800  | 0.41127000  |
| C | 5.18856400  | 1.71531400  | 0.74999700  |
| N | 2.04467300  | 3.31876700  | -0.04236300 |
| C | 1.56387900  | 2.05450800  | -0.26271800 |
| C | 2.68356200  | 1.06128800  | 0.09216600  |
| O | 0.44330100  | 1.77309700  | -0.68992400 |
| H | 7.08027300  | 2.62124000  | 1.23766000  |
| H | 6.24174200  | 4.94830000  | 1.06782500  |
| H | 3.86640700  | 5.39059000  | 0.47122700  |
| H | 5.54460800  | 0.69751800  | 0.83732700  |
| C | 1.29860600  | 4.54917900  | -0.22898200 |
| H | 1.70877800  | 5.12866600  | -1.06391800 |
| H | 0.25848700  | 4.30808600  | -0.44315300 |
| H | 1.34111000  | 5.15667800  | 0.68126300  |
| N | 2.61027600  | -0.10038700 | -0.55663400 |
| C | 3.56066800  | -1.06493900 | -0.36002600 |
| O | 4.42655100  | -1.12192900 | 0.51424800  |
| O | 3.38619900  | -2.04237800 | -1.29775800 |
| C | 4.27428300  | -3.20330300 | -1.36442300 |
| C | 3.72197700  | -3.98058100 | -2.56354100 |
| H | 4.30536000  | -4.89315200 | -2.72823700 |

|   |            |             |             |
|---|------------|-------------|-------------|
| H | 2.67783500 | -4.26620600 | -2.39355500 |
| H | 3.76553100 | -3.37385700 | -3.47456600 |
| C | 4.16485400 | -4.04622600 | -0.08811800 |
| H | 4.54543900 | -3.50157600 | 0.77709500  |
| H | 3.12025800 | -4.31867000 | 0.10319200  |
| H | 4.73878500 | -4.97331300 | -0.20447300 |
| C | 5.71767700 | -2.76420400 | -1.63968300 |
| H | 6.34563900 | -3.64462100 | -1.82042000 |
| H | 5.76008000 | -2.12966300 | -2.53269000 |
| H | 6.12944600 | -2.20897000 | -0.79537400 |

**a-N-gau2-syn-R**

|   |             |             |             |
|---|-------------|-------------|-------------|
| C | -3.04230400 | 0.68088100  | -1.16714400 |
| C | -3.69187800 | -0.67301400 | -0.87599600 |
| C | -2.91886200 | -1.86501900 | -0.67530500 |
| C | -5.06871900 | -0.76213500 | -0.81371200 |
| C | -1.49808600 | -1.92531500 | -0.72409800 |
| C | -3.66165600 | -3.07391500 | -0.43342500 |
| C | -5.68843200 | -2.00202700 | -0.54757100 |
| H | -5.67923100 | 0.11689800  | -0.99124700 |
| C | -0.83212100 | -3.13630500 | -0.55805500 |
| H | -0.90843700 | -1.03330600 | -0.90914600 |
| C | -2.94990500 | -4.29434600 | -0.27199800 |
| H | -6.77496500 | -2.06150500 | -0.49268700 |
| C | -1.58258300 | -4.32947600 | -0.33706100 |
| H | -3.53130200 | -5.19502900 | -0.09791000 |
| H | -1.03347200 | -5.25868100 | -0.21654400 |
| C | -2.71547000 | 1.42083800  | 0.15378800  |
| H | -2.21461500 | 0.69791000  | 0.80157000  |
| C | -3.92705900 | 2.05906200  | 0.87828500  |
| C | -1.08792900 | 2.89869500  | 1.29699900  |
| C | -2.21246300 | 3.74037600  | -0.72093200 |
| C | -3.53244700 | 3.45491000  | 1.40286000  |
| H | -4.76951500 | 2.15451800  | 0.18846500  |
| H | -4.24186800 | 1.41040200  | 1.70090500  |
| C | -2.23768200 | 3.33969500  | 2.23067000  |
| H | -0.52151800 | 2.04023400  | 1.65996300  |
| H | -0.37701300 | 3.70072500  | 1.09086200  |
| C | -3.27805700 | 4.38423900  | 0.19840600  |
| H | -2.62613500 | 3.42043600  | -1.67495600 |
| H | -1.35337600 | 4.38981500  | -0.90214000 |
| H | -4.34092200 | 3.85823700  | 2.02043900  |
| H | -1.99244900 | 4.30058400  | 2.69500200  |

|   |             |             |             |
|---|-------------|-------------|-------------|
| H | -4.20560700 | 4.53736700  | -0.36239000 |
| H | -2.93979600 | 5.36620700  | 0.54667000  |
| O | 0.49804700  | -3.29021800 | -0.60499500 |
| N | -5.02157600 | -3.12486000 | -0.36414500 |
| N | -1.66816200 | 2.51115200  | -0.04171900 |
| H | 1.00194400  | -2.42874500 | -0.53124000 |
| H | -2.10597100 | 0.51618600  | -1.71330600 |
| O | -3.88797300 | 1.52010700  | -1.94937700 |
| C | -3.92909900 | 1.16637700  | -3.32837500 |
| H | -4.32785600 | 0.15538800  | -3.47960800 |
| H | -4.59103200 | 1.88718100  | -3.81552700 |
| H | -2.93084300 | 1.22691700  | -3.78540300 |
| C | 2.27806400  | 0.90908600  | -2.14868600 |
| H | 1.91197100  | 0.14845500  | -2.82480400 |
| H | -0.88879600 | 2.09741000  | -0.61935000 |
| H | 3.13923300  | 1.49968000  | -2.43296800 |
| N | 1.26824900  | 1.64752700  | -1.58044000 |
| O | 1.46422800  | 2.78526500  | -1.10072300 |
| O | 0.12395600  | 1.08257000  | -1.48563300 |
| H | -2.37426900 | 2.61416100  | 3.04002700  |
| C | 5.29411900  | 2.15209800  | 1.19722100  |
| C | 6.44992600  | 1.80410200  | 0.49695600  |
| C | 6.42441700  | 0.80492100  | -0.48531300 |
| C | 5.21269100  | 0.17022700  | -0.73266000 |
| C | 4.03314900  | 0.50302800  | -0.02874800 |
| C | 4.07624600  | 1.50933300  | 0.93354700  |
| N | 4.96048800  | -0.84025600 | -1.67012000 |
| C | 3.63903400  | -1.23906200 | -1.63347900 |
| C | 2.94161200  | -0.36288100 | -0.57469900 |
| O | 3.13916400  | -2.11944000 | -2.31156000 |
| H | 5.33288700  | 2.93438400  | 1.95005300  |
| H | 7.38617600  | 2.31358600  | 0.70932200  |
| H | 7.32312600  | 0.53690800  | -1.03169700 |
| H | 3.17367100  | 1.78711800  | 1.46023800  |
| C | 5.94670600  | -1.42121300 | -2.55841100 |
| H | 6.75669000  | -1.89041500 | -1.98853400 |
| H | 5.44241100  | -2.18062700 | -3.15811500 |
| H | 6.37234200  | -0.65873500 | -3.22092600 |
| N | 1.93597100  | -0.97373300 | 0.05417600  |
| C | 1.43386100  | -0.53279300 | 1.25919800  |
| O | 1.30910400  | 0.62270700  | 1.65993900  |
| O | 1.03668200  | -1.62074100 | 1.96485500  |
| C | 0.55726200  | -1.53810000 | 3.35020000  |
| C | 0.34687000  | -3.01064200 | 3.71455000  |

|   |             |             |            |
|---|-------------|-------------|------------|
| H | -0.00275200 | -3.09868000 | 4.74886100 |
| H | -0.39703300 | -3.47192900 | 3.05687400 |
| H | 1.28360600  | -3.56895400 | 3.61633400 |
| C | -0.77038600 | -0.77779900 | 3.42310600 |
| H | -0.63252400 | 0.28160900  | 3.19959800 |
| H | -1.49289000 | -1.20397400 | 2.71856400 |
| H | -1.19103100 | -0.86621400 | 4.43176500 |
| C | 1.63071900  | -0.91359200 | 4.24806000 |
| H | 1.31600500  | -0.97598900 | 5.29625900 |
| H | 2.57680700  | -1.45699800 | 4.14584200 |
| H | 1.80069300  | 0.13526200  | 3.99748700 |

**a-O-anti-R-1**

|   |             |             |             |
|---|-------------|-------------|-------------|
| C | -3.73711300 | -0.04671000 | 0.49327900  |
| C | -4.12523700 | 1.43306500  | 0.48712000  |
| C | -3.14625800 | 2.47675000  | 0.39488400  |
| C | -5.45932800 | 1.78690600  | 0.53282900  |
| C | -1.74249800 | 2.26571200  | 0.41753400  |
| C | -3.64578800 | 3.82196100  | 0.29087100  |
| C | -5.83438000 | 3.14590200  | 0.44285500  |
| H | -6.22474200 | 1.02594500  | 0.64368800  |
| C | -0.86275100 | 3.33664400  | 0.34798700  |
| H | -1.32421600 | 1.26992100  | 0.49353100  |
| C | -2.71498100 | 4.89071900  | 0.17315300  |
| H | -6.88945000 | 3.41577900  | 0.47335900  |
| C | -1.36363200 | 4.66078300  | 0.19880500  |
| H | -3.11500000 | 5.89616100  | 0.08187600  |
| H | -0.64923200 | 5.47574300  | 0.12977500  |
| C | -3.75557700 | -0.59733500 | -0.95653900 |
| H | -3.27466600 | 0.15735700  | -1.58234000 |
| C | -5.15574200 | -0.96974000 | -1.51337100 |
| C | -2.65620600 | -2.10228500 | -2.58557700 |
| C | -3.38923900 | -3.04247600 | -0.42755600 |
| C | -5.10811600 | -2.37670000 | -2.14366100 |
| H | -5.89213800 | -0.96167700 | -0.70685300 |
| H | -5.46417300 | -0.22666700 | -2.25476500 |
| C | -4.02294400 | -2.41421800 | -3.23563300 |
| H | -2.17264000 | -1.22037000 | -3.00977000 |
| H | -1.94931100 | -2.93250000 | -2.63778200 |
| C | -4.75900200 | -3.40548500 | -1.04941700 |
| H | -3.46502300 | -2.80818100 | 0.63250300  |
| H | -2.63610300 | -3.82072400 | -0.56739400 |
| H | -6.08379400 | -2.61475600 | -2.57810900 |

|   |             |             |             |
|---|-------------|-------------|-------------|
| H | -3.99736000 | -3.39942700 | -3.71242700 |
| H | -5.53068800 | -3.40226500 | -0.27359500 |
| H | -4.72543200 | -4.41285800 | -1.47700900 |
| O | 0.47806900  | 3.20783500  | 0.40392100  |
| N | -4.97225500 | 4.13469700  | 0.30841800  |
| N | -2.85460500 | -1.81638800 | -1.11613600 |
| H | 0.73992100  | 2.31672700  | 0.74394200  |
| H | -2.71777200 | -0.15293800 | 0.88658600  |
| O | -4.61977200 | -0.83745100 | 1.28150400  |
| C | -4.44393200 | -0.66844400 | 2.68465400  |
| H | -4.65554000 | 0.35993800  | 3.00263500  |
| H | -5.15084200 | -1.34542900 | 3.17108600  |
| H | -3.42173500 | -0.93190300 | 2.99371500  |
| C | 1.69078300  | -0.53540700 | -1.14331200 |
| H | 2.43632600  | -1.01636900 | -1.76118100 |
| H | -1.89892700 | -1.55394700 | -0.74883200 |
| H | 1.50621600  | 0.52212700  | -1.27440600 |
| N | 0.53088700  | -1.26178000 | -0.98234600 |
| O | -0.52031200 | -0.62992500 | -0.59281600 |
| O | 0.50380200  | -2.50507300 | -1.12602900 |
| H | -4.24630800 | -1.68051500 | -4.01703000 |
| C | 4.38024400  | -3.91441000 | 0.72670600  |
| C | 3.47764500  | -4.44004500 | 1.65416500  |
| C | 2.43510600  | -3.65882600 | 2.16904500  |
| C | 2.33428400  | -2.34674800 | 1.72258100  |
| C | 3.23080900  | -1.80029500 | 0.78438200  |
| C | 4.26057600  | -2.59096800 | 0.28216400  |
| N | 1.39551300  | -1.37601000 | 2.12181200  |
| C | 1.64252200  | -0.17203600 | 1.51576300  |
| C | 2.83153600  | -0.37200300 | 0.56801000  |
| O | 0.99910500  | 0.85569200  | 1.71774900  |
| H | 5.18146600  | -4.53804500 | 0.34037700  |
| H | 3.58068700  | -5.47008600 | 1.98493000  |
| H | 1.73686500  | -4.06572100 | 2.89368600  |
| H | 4.94624800  | -2.18226900 | -0.45014400 |
| C | 0.32049200  | -1.59950200 | 3.06587200  |
| H | 0.71685700  | -1.92546500 | 4.03386700  |
| H | -0.20963100 | -0.65483400 | 3.19446500  |
| H | -0.37288300 | -2.36060800 | 2.68992500  |
| N | 3.59901800  | 0.70184200  | 0.39315400  |
| C | 4.65103500  | 0.66583700  | -0.47321200 |
| O | 4.79682500  | -0.09016500 | -1.44095900 |
| O | 5.51526700  | 1.66769500  | -0.16642400 |
| C | 6.68835900  | 1.95856300  | -0.99397200 |

|   |            |             |             |
|---|------------|-------------|-------------|
| C | 7.32589800 | 3.14413600  | -0.26275400 |
| H | 8.23419100 | 3.46786000  | -0.78273400 |
| H | 6.63222800 | 3.99055500  | -0.21723300 |
| H | 7.59430600 | 2.86800300  | 0.76280500  |
| C | 6.25517000 | 2.37267300  | -2.40526500 |
| H | 5.80950000 | 1.53427400  | -2.94353000 |
| H | 5.52225300 | 3.18615700  | -2.35433900 |
| H | 7.12262300 | 2.73313400  | -2.97070500 |
| C | 7.64903900 | 0.76365400  | -1.01037500 |
| H | 8.58010100 | 1.04169300  | -1.51829600 |
| H | 7.90021600 | 0.46225200  | 0.01325200  |
| H | 7.20904000 | -0.08949900 | -1.52950200 |

**a-O-anti-R-2**

|   |             |             |             |
|---|-------------|-------------|-------------|
| C | -3.22679300 | -0.42376800 | 0.65119300  |
| C | -4.14098800 | 0.73919400  | 0.25687400  |
| C | -3.69454300 | 1.83531500  | -0.55187900 |
| C | -5.45478000 | 0.73418700  | 0.68399500  |
| C | -2.36006900 | 2.00217800  | -1.01368700 |
| C | -4.67491600 | 2.83460300  | -0.88187100 |
| C | -6.33060500 | 1.77232800  | 0.29877600  |
| H | -5.81590000 | -0.06154600 | 1.32637300  |
| C | -2.00440700 | 3.12259500  | -1.75081600 |
| H | -1.60104600 | 1.25648800  | -0.80007300 |
| C | -4.28273400 | 3.94440200  | -1.68008700 |
| H | -7.36671600 | 1.75502100  | 0.63484100  |
| C | -2.98784200 | 4.08937000  | -2.10320400 |
| H | -5.04349700 | 4.67890100  | -1.92677400 |
| H | -2.67722300 | 4.94396800  | -2.69672900 |
| C | -3.24879600 | -1.50762700 | -0.44775700 |
| H | -2.93817000 | -1.00790400 | -1.36725700 |
| C | -4.59150500 | -2.24282500 | -0.66182300 |
| C | -1.89730900 | -3.23422600 | -1.56374900 |
| C | -2.58378700 | -3.63118200 | 0.76748000  |
| C | -4.30667300 | -3.70930800 | -1.05159200 |
| H | -5.19122900 | -2.21817400 | 0.25306900  |
| H | -5.15990100 | -1.73130500 | -1.44345400 |
| C | -3.23062900 | -3.74552300 | -2.15529300 |
| H | -1.40216100 | -2.48774800 | -2.18561700 |
| H | -1.19047900 | -4.04132600 | -1.35868500 |
| C | -3.76516600 | -4.44394700 | 0.19012500  |
| H | -2.84445100 | -3.10407000 | 1.68231100  |
| H | -1.69358100 | -4.23871600 | 0.94358800  |



|   |             |             |             |
|---|-------------|-------------|-------------|
| H | -5.22572600 | -4.18728600 | -1.40331800 |
| H | -3.09982000 | -4.76498900 | -2.53186400 |
| H | -4.54865500 | -4.54056900 | 0.94842800  |
| H | -3.44417800 | -5.45609200 | -0.07931100 |
| O | -0.75030500 | 3.38525600  | -2.17452800 |
| N | -5.97073300 | 2.78624800  | -0.46329300 |
| N | -2.17988500 | -2.57323100 | -0.23418700 |
| H | -0.07250100 | 2.80944000  | -1.74812600 |
| H | -2.19086900 | -0.07114100 | 0.74153100  |
| O | -3.62673800 | -1.01547300 | 1.88214300  |
| C | -3.21730800 | -0.27799900 | 3.03049700  |
| H | -3.63329600 | 0.73751300  | 3.03225500  |
| H | -3.59539200 | -0.81914500 | 3.90158500  |
| H | -2.12119600 | -0.21865600 | 3.09163800  |
| C | 2.03276700  | -0.85344700 | -0.75199800 |
| H | 2.69809100  | -1.61237600 | -0.36458300 |
| H | -1.28422500 | -2.12858200 | 0.09414900  |
| H | 2.19839000  | -0.45175700 | -1.74202600 |
| N | 0.70473400  | -1.05682500 | -0.48115600 |
| O | -0.18493500 | -0.50017200 | -1.19126800 |
| O | 0.36178200  | -1.76031700 | 0.53117400  |
| H | -3.53733300 | -3.12297400 | -3.00268500 |
| C | 3.14920300  | -0.64203300 | 3.87728900  |
| C | 2.09333100  | 0.11288900  | 4.39198300  |
| C | 1.36487400  | 0.98754900  | 3.57453100  |
| C | 1.73126000  | 1.07344400  | 2.23644200  |
| C | 2.79350000  | 0.32074300  | 1.69936300  |
| C | 3.50657900  | -0.54305500 | 2.52570300  |
| N | 1.15646000  | 1.89103000  | 1.24466300  |
| C | 1.79517600  | 1.72696000  | 0.03934600  |
| C | 2.93250300  | 0.71807500  | 0.26179700  |
| O | 1.50099700  | 2.28268500  | -1.01385300 |
| H | 3.69920600  | -1.31571800 | 4.52819700  |
| H | 1.82798400  | 0.02585200  | 5.44230300  |
| H | 0.54951100  | 1.57965400  | 3.97800100  |
| H | 4.31947200  | -1.13128200 | 2.11745600  |
| C | 0.12802600  | 2.88210600  | 1.49732600  |
| H | 0.45261800  | 3.56511900  | 2.29044700  |
| H | -0.02840500 | 3.45092500  | 0.58100000  |
| H | -0.81434700 | 2.41246500  | 1.79657800  |
| N | 4.04525100  | 0.96326800  | -0.42382800 |
| C | 5.11414600  | 0.11934600  | -0.33876300 |
| O | 5.09279900  | -1.08532400 | -0.06078600 |
| O | 6.23861800  | 0.78858200  | -0.69772300 |

|   |            |             |             |
|---|------------|-------------|-------------|
| C | 7.53960700 | 0.12292300  | -0.80504400 |
| C | 8.46445700 | 1.27157000  | -1.21945300 |
| H | 9.49011000 | 0.90880500  | -1.34800000 |
| H | 8.13226200 | 1.71331000  | -2.16496400 |
| H | 8.46876800 | 2.05888000  | -0.45786700 |
| C | 7.49865600 | -0.95209900 | -1.89683200 |
| H | 6.82699200 | -1.76772900 | -1.62288500 |
| H | 7.15904700 | -0.51994200 | -2.84518300 |
| H | 8.50331200 | -1.36294500 | -2.05230600 |
| C | 7.97102200 | -0.44630600 | 0.55163200  |
| H | 9.00400400 | -0.80884400 | 0.48999000  |
| H | 7.93197900 | 0.33272700  | 1.32183100  |
| H | 7.32878100 | -1.27395300 | 0.85756800  |

**a-Boc-O-gau1-R**

|   |            |             |             |
|---|------------|-------------|-------------|
| C | 2.35237600 | 0.53529000  | 0.78948600  |
| C | 3.36012600 | -0.48997700 | 0.25873900  |
| C | 3.01672900 | -1.46980200 | -0.72918500 |
| C | 4.65343200 | -0.48565000 | 0.74471600  |
| C | 1.70728100 | -1.66052700 | -1.24242700 |
| C | 4.07224300 | -2.33549400 | -1.18337100 |
| C | 5.61055900 | -1.38714700 | 0.22867200  |
| H | 4.94122100 | 0.20117500  | 1.53299900  |
| C | 1.44402500 | -2.68302600 | -2.13841100 |
| H | 0.89741200 | -0.99651300 | -0.96466000 |
| C | 3.77643800 | -3.32496400 | -2.16087000 |
| H | 6.63071300 | -1.36393800 | 0.61051500  |
| C | 2.49769400 | -3.50322200 | -2.62456400 |
| H | 4.59332500 | -3.95365600 | -2.50243300 |
| H | 2.25906600 | -4.27937300 | -3.34565800 |
| C | 2.50924100 | 1.87380900  | 0.02988700  |
| H | 2.46858900 | 1.63139300  | -1.03316400 |
| C | 3.78281000 | 2.68844900  | 0.36946400  |
| C | 1.31646400 | 3.85307100  | -0.86513200 |
| C | 1.31726300 | 3.48847900  | 1.57318800  |
| C | 3.43962700 | 4.19032500  | 0.42205300  |
| H | 4.18193600 | 2.37686100  | 1.33808500  |
| H | 4.54849100 | 2.49053700  | -0.38613700 |
| C | 2.67927300 | 4.57760000  | -0.85914800 |
| H | 1.07655200 | 3.33381300  | -1.79058200 |
| H | 0.48278600 | 4.51811400  | -0.63455100 |
| C | 2.53055400 | 4.44370400  | 1.64118200  |
| H | 1.36202800 | 2.70244800  | 2.32328700  |
| H | 0.35847000 | 4.00100900  | 1.64931200  |

|   |             |             |             |
|---|-------------|-------------|-------------|
| H | 4.35932800  | 4.77666400  | 0.51148400  |
| H | 2.52220100  | 5.66051100  | -0.90213400 |
| H | 3.08392400  | 4.26863300  | 2.56961300  |
| H | 2.19794700  | 5.48758500  | 1.65167500  |
| O | 0.19680000  | -2.96674600 | -2.58816000 |
| N | 5.34976500  | -2.27339000 | -0.71206000 |
| N | 1.31396000  | 2.80255000  | 0.22744900  |
| H | -0.47334400 | -2.59100000 | -1.97375300 |
| H | 1.33140500  | 0.17211600  | 0.62231300  |
| O | 2.53365800  | 0.77659000  | 2.18192900  |
| C | 2.03166200  | -0.27249900 | 3.00697000  |
| H | 2.59108500  | -1.20589600 | 2.86045200  |
| H | 2.15515500  | 0.05815300  | 4.04162000  |
| H | 0.96728800  | -0.45963300 | 2.80823200  |
| C | -2.15390900 | 0.64217900  | -2.07035800 |
| H | -3.06141200 | 1.03903300  | -2.50479100 |
| H | 0.42880000  | 2.27209800  | 0.13178100  |
| H | -1.90803800 | -0.40442300 | -2.17158000 |
| N | -1.08816400 | 1.50266100  | -2.10437000 |
| O | 0.06425000  | 1.06054300  | -1.79331200 |
| O | -1.27062000 | 2.72489500  | -2.34534400 |
| H | 3.26596900  | 4.29922200  | -1.74175700 |
| C | -6.09241300 | -1.07584400 | -0.43186000 |
| C | -6.73892700 | 0.16104600  | -0.36417800 |
| C | -6.02244100 | 1.34349100  | -0.13297800 |
| C | -4.64575400 | 1.24223200  | 0.02712500  |
| C | -3.97603500 | 0.00102300  | -0.04598600 |
| C | -4.70294200 | -1.16334500 | -0.27620500 |
| N | -3.72767800 | 2.27349600  | 0.27324200  |
| C | -2.45057200 | 1.77400600  | 0.40173600  |
| C | -2.53488100 | 0.27459300  | 0.18350200  |
| O | -1.45341900 | 2.43982300  | 0.67378000  |
| H | -6.66921700 | -1.97780600 | -0.61467200 |
| H | -7.81682200 | 0.21308800  | -0.49171200 |
| H | -6.52994600 | 2.30151600  | -0.07906300 |
| H | -4.19904500 | -2.11990300 | -0.35460400 |
| C | -4.05158100 | 3.68400000  | 0.33339800  |
| H | -4.74450000 | 3.89086100  | 1.15668400  |
| H | -3.12204400 | 4.23018200  | 0.49880300  |
| H | -4.50263100 | 4.01782600  | -0.60756000 |
| N | -1.59010300 | -0.47941100 | 0.69344900  |
| C | -1.54783000 | -1.83024200 | 0.48760300  |
| O | -1.68391100 | -2.40075700 | -0.60481200 |
| O | -1.24195600 | -2.46528700 | 1.63326800  |

|   |             |             |             |
|---|-------------|-------------|-------------|
| C | -1.12273700 | -3.93517000 | 1.73062900  |
| C | -0.84125200 | -4.13700900 | 3.22176000  |
| H | -0.72796100 | -5.20363200 | 3.44268000  |
| H | 0.08127100  | -3.62481900 | 3.51576200  |
| H | -1.66170200 | -3.74288400 | 3.83094900  |
| C | 0.05167100  | -4.43623500 | 0.88756100  |
| H | -0.14284300 | -4.32628100 | -0.18004100 |
| H | 0.96738300  | -3.89107200 | 1.13932000  |
| H | 0.22309600  | -5.49820700 | 1.09867500  |
| C | -2.44447900 | -4.60107000 | 1.33687800  |
| H | -2.39948100 | -5.67003200 | 1.57484000  |
| H | -3.27820700 | -4.16522300 | 1.89903500  |
| H | -2.64342100 | -4.49484200 | 0.26872900  |

**a-Boc-O-gau2-R**

|   |            |             |             |
|---|------------|-------------|-------------|
| C | 3.22292000 | 0.21532400  | -0.96488700 |
| C | 3.64669200 | 1.62386400  | -0.54914500 |
| C | 2.72675000 | 2.55904700  | 0.02968100  |
| C | 4.96692700 | 2.00199900  | -0.69286300 |
| C | 1.32935200 | 2.32934100  | 0.18668600  |
| C | 3.28140200 | 3.81015500  | 0.47234500  |
| C | 5.39465500 | 3.26927300  | -0.24122100 |
| H | 5.67837900 | 1.32665200  | -1.15564300 |
| C | 0.52189100 | 3.29865300  | 0.76263200  |
| H | 0.87196700 | 1.40382100  | -0.15134800 |
| C | 2.42455400 | 4.76362700  | 1.08692500  |
| H | 6.43884100 | 3.55820200  | -0.35538900 |
| C | 1.08577300 | 4.51725300  | 1.23426100  |
| H | 2.86887000 | 5.69551400  | 1.42329300  |
| H | 0.42136400 | 5.24439900  | 1.69111700  |
| C | 3.33312300 | -0.73348700 | 0.25459600  |
| H | 2.85253600 | -0.21851100 | 1.08983500  |
| C | 4.76680500 | -1.17434500 | 0.64145300  |
| C | 2.27059400 | -2.62321000 | 1.43385600  |
| C | 3.13314900 | -3.00025700 | -0.84355600 |
| C | 4.74790900 | -2.66138200 | 1.05266100  |
| H | 5.44531200 | -1.03770400 | -0.20483200 |
| H | 5.12926200 | -0.55012200 | 1.46333000  |
| C | 3.64031600 | -2.88382200 | 2.10097600  |
| H | 1.63596000 | -1.94050500 | 2.00202500  |
| H | 1.70431700 | -3.53913600 | 1.25229100  |
| C | 4.43600200 | -3.51847900 | -0.19085600 |
| H | 3.31695400 | -2.48394100 | -1.78387600 |

|   |             |             |             |
|---|-------------|-------------|-------------|
| H | 2.38661800  | -3.77925200 | -1.00641600 |
| H | 5.72072100  | -2.94203500 | 1.46720600  |
| H | 3.67586400  | -3.90773700 | 2.48652000  |
| H | 5.25806700  | -3.45726600 | -0.91104400 |
| H | 4.33092500  | -4.57059600 | 0.09572300  |
| O | -0.81332900 | 3.18392400  | 0.93453600  |
| N | 4.59560900  | 4.14478600  | 0.33539700  |
| N | 2.49587200  | -1.99540100 | 0.08187400  |
| H | -1.23213600 | 2.43983100  | 0.44619200  |
| H | 2.17601000  | 0.22704400  | -1.29241400 |
| O | 4.03099000  | -0.30389200 | -2.01515400 |
| C | 3.70478600  | 0.22163000  | -3.29915300 |
| H | 3.84992500  | 1.30841500  | -3.34366400 |
| H | 4.37966700  | -0.25710400 | -4.01327900 |
| H | 2.66592100  | -0.01172800 | -3.57234500 |
| C | -1.74888600 | -1.06782700 | -1.88014500 |
| H | -1.73972400 | 0.01208200  | -1.87363300 |
| H | 1.55017000  | -1.70618300 | -0.29520700 |
| H | -2.18200500 | -1.60556100 | -2.71270200 |
| N | -0.58022900 | -1.61336500 | -1.41222800 |
| O | -0.29768800 | -2.82335400 | -1.57980600 |
| O | 0.18227800  | -0.86621200 | -0.69739800 |
| H | 3.78662200  | -2.21007100 | 2.95202800  |
| C | -1.43867300 | -1.44802600 | 2.90362800  |
| C | -1.47643100 | -2.84035000 | 3.01213100  |
| C | -2.06360500 | -3.62829300 | 2.01294700  |
| C | -2.61515900 | -2.97688300 | 0.91415000  |
| C | -2.58618600 | -1.57016500 | 0.78712400  |
| C | -1.98771100 | -0.80561600 | 1.78420100  |
| N | -3.29073800 | -3.55468800 | -0.16679100 |
| C | -3.78056900 | -2.58757600 | -1.02570200 |
| C | -3.30715200 | -1.22732800 | -0.47480900 |
| O | -4.44263100 | -2.79640100 | -2.02630400 |
| H | -0.98439700 | -0.85468100 | 3.69240100  |
| H | -1.05050100 | -3.32571900 | 3.88672900  |
| H | -2.10102300 | -4.70923000 | 2.10430400  |
| H | -1.94725600 | 0.27207500  | 1.69162200  |
| C | -3.47401000 | -4.97521800 | -0.37549200 |
| H | -4.01764000 | -5.42909900 | 0.46114700  |
| H | -4.05612400 | -5.09921300 | -1.29014800 |
| H | -2.50714400 | -5.47860900 | -0.49073300 |
| N | -4.11051700 | -0.19538700 | -0.72994000 |
| C | -3.75838100 | 1.06799600  | -0.39810200 |
| O | -2.60146100 | 1.49590500  | -0.22481300 |

|   |             |            |             |
|---|-------------|------------|-------------|
| O | -4.85644800 | 1.85678700 | -0.37551600 |
| C | -4.80975600 | 3.29774900 | -0.10382900 |
| C | -6.27836500 | 3.70459300 | -0.26405000 |
| H | -6.39874600 | 4.77592600 | -0.07012800 |
| H | -6.63093400 | 3.49457500 | -1.27953800 |
| H | -6.91173400 | 3.15237700 | 0.43847900  |
| C | -3.94223200 | 4.02599400 | -1.13678300 |
| H | -2.88274800 | 3.80379700 | -1.00389400 |
| H | -4.23899900 | 3.74161300 | -2.15288400 |
| H | -4.08442700 | 5.10826900 | -1.03460300 |
| C | -4.34267900 | 3.54995900 | 1.33341200  |
| H | -4.46759400 | 4.61061300 | 1.58141500  |
| H | -4.94645000 | 2.96520200 | 2.03678200  |
| H | -3.29119000 | 3.29274900 | 1.47031600  |

**a-Boc-O-anti-R**

|   |            |             |             |
|---|------------|-------------|-------------|
| C | 3.22267000 | 0.21464600  | -0.96481700 |
| C | 3.64688700 | 1.62310500  | -0.54925700 |
| C | 2.72726000 | 2.55866100  | 0.02946900  |
| C | 4.96724800 | 2.00078400  | -0.69302500 |
| C | 1.32977100 | 2.32947500  | 0.18645000  |
| C | 3.28235500 | 3.80960100  | 0.47206100  |
| C | 5.39541700 | 3.26794200  | -0.24148200 |
| H | 5.67846600 | 1.32516100  | -1.15575900 |
| C | 0.52265200 | 3.29912100  | 0.76231600  |
| H | 0.87205900 | 1.40411100  | -0.15157100 |
| C | 2.42584800 | 4.76340600  | 1.08660300  |
| H | 6.43970000 | 3.55650700  | -0.35567800 |
| C | 1.08698000 | 4.51752100  | 1.23393500  |
| H | 2.87050100 | 5.69514000  | 1.42295000  |
| H | 0.42283200 | 5.24492400  | 1.69076200  |
| C | 3.33277000 | -0.73409600 | 0.25473000  |
| H | 2.85239200 | -0.21896100 | 1.08999200  |
| C | 4.76637800 | -1.17527300 | 0.64148300  |
| C | 2.26984900 | -2.62347700 | 1.43420600  |
| C | 3.13222600 | -3.00094800 | -0.84318200 |
| C | 4.74714900 | -2.66224100 | 1.05291300  |
| H | 5.44480300 | -1.03895300 | -0.20492200 |
| H | 5.12911800 | -0.55100400 | 1.46320100  |
| C | 3.63954900 | -2.88425800 | 2.10131100  |
| H | 1.63533400 | -1.94062400 | 2.00232800  |
| H | 1.70343300 | -3.53933600 | 1.25273500  |
| C | 4.43496900 | -3.51942700 | -0.19047600 |
| H | 3.31613500 | -2.48478000 | -1.78356200 |

|   |             |             |             |
|---|-------------|-------------|-------------|
| H | 2.38550100  | -3.77977800 | -1.00594200 |
| H | 5.71991200  | -2.94307200 | 1.46745200  |
| H | 3.67489200  | -3.90811400 | 2.48703500  |
| H | 5.25701900  | -3.45850100 | -0.91070600 |
| H | 4.32963600  | -4.57148100 | 0.09623800  |
| O | -0.81262200 | 3.18496400  | 0.93412000  |
| N | 4.59667700  | 4.14376400  | 0.33509400  |
| N | 2.49520900  | -1.99584400 | 0.08215400  |
| H | -1.23166600 | 2.44075500  | 0.44614100  |
| H | 2.17572500  | 0.22659700  | -1.29221500 |
| O | 4.03047200  | -0.30487200 | -2.01514800 |
| C | 3.70418900  | 0.22058400  | -3.29915300 |
| H | 3.84931100  | 1.30736900  | -3.34372300 |
| H | 4.37903900  | -0.25817300 | -4.01329400 |
| H | 2.66531300  | -0.01280400 | -3.57227600 |
| C | -1.74933000 | -1.06780900 | -1.88036500 |
| H | -1.73990800 | 0.01209600  | -1.87407400 |
| H | 1.54956900  | -1.70644800 | -0.29495300 |
| H | -2.18261200 | -1.60559000 | -2.71280800 |
| N | -0.58075200 | -1.61352200 | -1.41243600 |
| O | -0.29849200 | -2.82359300 | -1.57981600 |
| O | 0.18194800  | -0.86638900 | -0.69779400 |
| H | 3.78603100  | -2.21039900 | 2.95224600  |
| C | -1.43875600 | -1.44856600 | 2.90340800  |
| C | -1.47697200 | -2.84089500 | 3.01170500  |
| C | -2.06452900 | -3.62848700 | 2.01247100  |
| C | -2.61599200 | -2.97672200 | 0.91383800  |
| C | -2.58656300 | -1.56999300 | 0.78702400  |
| C | -1.98771900 | -0.80579700 | 1.78414900  |
| N | -3.29189500 | -3.55412700 | -0.16711100 |
| C | -3.78167300 | -2.58670100 | -1.02570600 |
| C | -3.30758400 | -1.22671800 | -0.47475700 |
| O | -4.44413100 | -2.79513900 | -2.02612500 |
| H | -0.98420300 | -0.85549600 | 3.69222900  |
| H | -1.05110800 | -3.32653900 | 3.88618200  |
| H | -2.10232000 | -4.70942500 | 2.10367600  |
| H | -1.94694600 | 0.27189600  | 1.69173900  |
| C | -3.47587700 | -4.97455200 | -0.37589100 |
| H | -4.01995000 | -5.42818400 | 0.46059900  |
| H | -4.05783600 | -5.09821200 | -1.29069100 |
| H | -2.50924500 | -5.47843500 | -0.49091100 |
| N | -4.11050000 | -0.19436900 | -0.72966900 |
| C | -3.75769000 | 1.06880400  | -0.39772400 |
| O | -2.60049100 | 1.49606800  | -0.22460300 |

|   |             |            |             |
|---|-------------|------------|-------------|
| O | -4.85538900 | 1.85808400 | -0.37480300 |
| C | -4.80810300 | 3.29907200 | -0.10337400 |
| C | -6.27657600 | 3.70645400 | -0.26347500 |
| H | -6.39660500 | 4.77776500 | -0.06920600 |
| H | -6.62922600 | 3.49688100 | -1.27902600 |
| H | -6.91011500 | 3.15422200 | 0.43888700  |
| C | -3.94045700 | 4.02680500 | -1.13658100 |
| H | -2.88104700 | 3.80410700 | -1.00395400 |
| H | -4.23762600 | 3.74251700 | -2.15259000 |
| H | -4.08207300 | 5.10915700 | -1.03442300 |
| C | -4.34076300 | 3.55132800 | 1.33377300  |
| H | -4.46499800 | 4.61211300 | 1.58155400  |
| H | -4.94483200 | 2.96709000 | 2.03731800  |
| H | -3.28942400 | 3.29351100 | 1.47066800  |

**a-Boc-O-gau1-S**

|   |             |             |             |
|---|-------------|-------------|-------------|
| C | 3.01550800  | -1.32941900 | -0.62328000 |
| C | 4.04977600  | -0.20979700 | -0.74549500 |
| C | 3.66186800  | 1.15250300  | -0.97074100 |
| C | 5.39581500  | -0.49986900 | -0.66183200 |
| C | 2.31443600  | 1.59353400  | -1.07871400 |
| C | 4.71969300  | 2.11322300  | -1.11506900 |
| C | 6.35202900  | 0.53216100  | -0.79736800 |
| H | 5.72413400  | -1.52326700 | -0.51497700 |
| C | 2.02469800  | 2.92325600  | -1.33661300 |
| H | 1.48942300  | 0.89579600  | -0.99849500 |
| C | 4.38348800  | 3.46788800  | -1.38690600 |
| H | 7.41269600  | 0.29370600  | -0.72486500 |
| C | 3.07592300  | 3.86689700  | -1.49890800 |
| H | 5.20020900  | 4.17461000  | -1.49993900 |
| H | 2.81546500  | 4.90078800  | -1.70481300 |
| C | 2.45374100  | -1.41051800 | 0.81906600  |
| H | 2.30291100  | -0.38366000 | 1.16066200  |
| C | 3.31512000  | -2.20174100 | 1.83536100  |
| C | 0.38962200  | -1.69280100 | 2.15993600  |
| C | 1.03456800  | -3.49364400 | 0.60414400  |
| C | 2.39924300  | -3.10886500 | 2.68307800  |
| H | 4.04959800  | -2.81378500 | 1.30586100  |
| H | 3.86089300  | -1.49996000 | 2.47347500  |
| C | 1.27000300  | -2.25906700 | 3.29832200  |
| H | 0.26032100  | -0.61110100 | 2.20841900  |
| H | -0.60449500 | -2.13803100 | 2.10728600  |
| C | 1.77375600  | -4.18477500 | 1.77225900  |
| H | 1.51449900  | -3.66981400 | -0.35614000 |
| H | -0.01760800 | -3.77021500 | 0.52628500  |



|   |             |             |             |
|---|-------------|-------------|-------------|
| H | 2.98542700  | -3.58592000 | 3.47473900  |
| H | 0.65881600  | -2.86733900 | 3.97306900  |
| H | 2.55212700  | -4.84666000 | 1.37906700  |
| H | 1.07886900  | -4.80442800 | 2.34953000  |
| O | 0.76506000  | 3.40812400  | -1.45750700 |
| N | 6.04249500  | 1.79401900  | -1.01989400 |
| N | 1.04971800  | -2.00336700 | 0.83739000  |
| H | 0.08739600  | 2.78661200  | -1.10396600 |
| H | 2.17713800  | -1.10842700 | -1.29463800 |
| O | 3.55605900  | -2.59975300 | -0.96973300 |
| C | 3.61185300  | -2.82896900 | -2.37504900 |
| H | 4.26772400  | -2.10840700 | -2.88061900 |
| H | 4.01728100  | -3.83509300 | -2.51135100 |
| H | 2.61086500  | -2.77811700 | -2.82633500 |
| C | -2.13466200 | -0.50160500 | -2.08036700 |
| H | -1.96223700 | 0.55929100  | -2.19317700 |
| H | 0.50405300  | -1.54084900 | 0.06825600  |
| H | -2.84751400 | -1.00922500 | -2.71818400 |
| N | -0.99748400 | -1.22436700 | -1.82331800 |
| O | -0.92960100 | -2.45594400 | -2.02302800 |
| O | -0.04371500 | -0.59793500 | -1.23820100 |
| H | 1.69630400  | -1.44361800 | 3.89297900  |
| C | -5.90159400 | 1.92789800  | -1.30550800 |
| C | -6.82244200 | 0.88998100  | -1.46863800 |
| C | -6.47087200 | -0.44060400 | -1.20424600 |
| C | -5.17382700 | -0.69296300 | -0.76951300 |
| C | -4.23179400 | 0.34477200  | -0.60265500 |
| C | -4.59558900 | 1.65971400  | -0.87363500 |
| N | -4.60408600 | -1.92948300 | -0.43419200 |
| C | -3.30865400 | -1.77148300 | 0.02511200  |
| C | -2.96602400 | -0.28501200 | -0.12157000 |
| O | -2.60004000 | -2.65876700 | 0.47697500  |
| H | -6.19662900 | 2.95112400  | -1.51954700 |
| H | -7.83084200 | 1.11263500  | -1.80716900 |
| H | -7.19113200 | -1.24282900 | -1.33056800 |
| H | -3.87171200 | 2.45936600  | -0.76403200 |
| C | -5.29419800 | -3.20233600 | -0.46750700 |
| H | -6.15505500 | -3.20065700 | 0.21155000  |
| H | -5.64048300 | -3.43028100 | -1.48183200 |
| H | -4.58659600 | -3.96898300 | -0.14771900 |
| N | -2.06519500 | 0.17698400  | 0.73174500  |
| C | -1.62775900 | 1.46112000  | 0.75354700  |
| O | -1.45345100 | 2.22128800  | -0.21222900 |
| O | -1.30958600 | 1.78987100  | 2.03328300  |

|   |             |            |            |
|---|-------------|------------|------------|
| C | -1.00758400 | 3.15936300 | 2.47547900 |
| C | -0.97519200 | 3.00528800 | 3.99934600 |
| H | -0.75585100 | 3.96824000 | 4.47282600 |
| H | -1.93962800 | 2.64683000 | 4.37436700 |
| H | -0.20231500 | 2.28951500 | 4.30053800 |
| C | -2.12665900 | 4.11973600 | 2.06083500 |
| H | -2.15514100 | 4.25686600 | 0.97829800 |
| H | -3.10040300 | 3.74438100 | 2.39630000 |
| H | -1.96179400 | 5.09689000 | 2.52893900 |
| C | 0.35886500  | 3.61199700 | 1.95688100 |
| H | 0.65746800  | 4.53501200 | 2.46778900 |
| H | 1.12058100  | 2.85245300 | 2.16605800 |
| H | 0.34008700  | 3.80978900 | 0.88496900 |

**a-Boc-O-gau2-S**

|   |             |             |             |
|---|-------------|-------------|-------------|
| C | -2.71462700 | -0.75098300 | -1.05544400 |
| C | -3.45737400 | -1.40971400 | 0.10623200  |
| C | -2.91494500 | -1.41558700 | 1.43154300  |
| C | -4.67970500 | -2.01397200 | -0.10437700 |
| C | -1.66400900 | -0.84180700 | 1.78300500  |
| C | -3.69856600 | -2.05386800 | 2.45113800  |
| C | -5.36557800 | -2.61387300 | 0.97619600  |
| H | -5.10912100 | -2.04115700 | -1.10015100 |
| C | -1.20013200 | -0.89992700 | 3.08921600  |
| H | -1.04284400 | -0.35542900 | 1.03860400  |
| C | -3.19608900 | -2.08661100 | 3.78161900  |
| H | -6.32989300 | -3.08999800 | 0.80250200  |
| C | -1.98421100 | -1.52843800 | 4.09677700  |
| H | -3.80639300 | -2.57262000 | 4.53696600  |
| H | -1.59413300 | -1.55498400 | 5.10973700  |
| C | -2.89186200 | 0.78132700  | -1.00195700 |
| H | -2.60188000 | 1.08943000  | 0.00510800  |
| C | -4.30212000 | 1.32145400  | -1.33154200 |
| C | -1.74993300 | 2.92281800  | -1.40943600 |
| C | -2.32688100 | 1.52510800  | -3.35320300 |
| C | -4.15931000 | 2.66425000  | -2.07895000 |
| H | -4.84866400 | 0.60677100  | -1.95466600 |
| H | -4.86414200 | 1.44860900  | -0.40171900 |
| C | -3.15543700 | 3.56327700  | -1.32738500 |
| H | -1.23853300 | 2.87559800  | -0.44721800 |
| H | -1.08855200 | 3.42696300  | -2.11510200 |
| C | -3.60721000 | 2.37988500  | -3.48925200 |
| H | -2.48315400 | 0.48783100  | -3.64114500 |
| H | -1.48151600 | 1.92920100  | -3.91367200 |

|   |             |             |             |
|---|-------------|-------------|-------------|
| H | -5.13239500 | 3.15962800  | -2.14699100 |
| H | -3.12999200 | 4.56365500  | -1.77133900 |
| H | -4.34768600 | 1.83972000  | -4.08777400 |
| H | -3.39141000 | 3.32089500  | -4.00708400 |
| O | -0.01728700 | -0.38684600 | 3.48299000  |
| N | -4.90676900 | -2.63836500 | 2.21220600  |
| N | -1.89897600 | 1.50598700  | -1.90380300 |
| H | 0.48148800  | 0.00945100  | 2.72519200  |
| H | -1.64197600 | -0.96614400 | -0.95850500 |
| O | -3.16863700 | -1.22043000 | -2.31758600 |
| C | -2.55597100 | -2.44339300 | -2.72421800 |
| H | -2.77022900 | -3.25947400 | -2.02234800 |
| H | -2.97877200 | -2.69403300 | -3.70050800 |
| H | -1.46800300 | -2.32534000 | -2.81830200 |
| C | 2.63536300  | 0.27858100  | -2.42445500 |
| H | 2.63543000  | -0.66470500 | -2.95479600 |
| H | -0.96552600 | 1.01499500  | -1.86800700 |
| H | 3.33722300  | 1.05268400  | -2.70178000 |
| N | 1.38676700  | 0.75884600  | -2.12929200 |
| O | 1.25721300  | 1.94323700  | -1.73515200 |
| O | 0.37725400  | -0.03336400 | -2.16635700 |
| H | -3.46338500 | 3.67980800  | -0.28268700 |
| C | 1.65307300  | -3.41040100 | 0.35216500  |
| C | 2.65084700  | -4.26030900 | -0.12619100 |
| C | 3.82755600  | -3.74365300 | -0.68401200 |
| C | 3.96760800  | -2.36137100 | -0.74141600 |
| C | 2.97448900  | -1.48053800 | -0.25293500 |
| C | 1.80963000  | -2.01913600 | 0.28746100  |
| N | 5.05051300  | -1.64747600 | -1.26658100 |
| C | 4.85326800  | -0.28445200 | -1.15384500 |
| C | 3.46515600  | -0.08371700 | -0.49555800 |
| O | 5.63889600  | 0.57442800  | -1.51154500 |
| H | 0.74618900  | -3.82569000 | 0.78258800  |
| H | 2.52052200  | -5.33777800 | -0.06736600 |
| H | 4.60413100  | -4.40384800 | -1.05721600 |
| H | 1.04575400  | -1.35780700 | 0.66480700  |
| C | 6.24777300  | -2.23794800 | -1.82796700 |
| H | 6.75824600  | -2.86355300 | -1.08667800 |
| H | 6.01005800  | -2.84979100 | -2.70612200 |
| H | 6.90752100  | -1.42116700 | -2.12531400 |
| N | 3.36509800  | 1.05801900  | 0.17802000  |
| C | 2.40845300  | 1.34382000  | 1.09764900  |
| O | 1.41958500  | 0.67243300  | 1.44516100  |
| O | 2.70510100  | 2.54861600  | 1.64269000  |

|   |             |            |            |
|---|-------------|------------|------------|
| C | 1.95996700  | 3.16893000 | 2.73794900 |
| C | 2.63919000  | 4.53850200 | 2.85350300 |
| H | 2.19172400  | 5.11801000 | 3.66829900 |
| H | 3.70905000  | 4.42310500 | 3.05643700 |
| H | 2.52739100  | 5.10415400 | 1.92231600 |
| C | 2.16178700  | 2.37071600 | 4.03057000 |
| H | 1.67219500  | 1.39614600 | 3.99581700 |
| H | 3.23033000  | 2.21976000 | 4.21954600 |
| H | 1.74241500  | 2.92523100 | 4.87819100 |
| C | 0.47885900  | 3.35042900 | 2.38564300 |
| H | 0.00341100  | 3.99882600 | 3.13087200 |
| H | 0.38181300  | 3.83343100 | 1.40644400 |
| H | -0.05447600 | 2.39953700 | 2.36645300 |

**a-Boc-O-anti-S**

|   |             |             |             |
|---|-------------|-------------|-------------|
| C | -3.00512500 | 0.22307200  | 0.68267900  |
| C | -3.30996600 | 1.72199700  | 0.67982500  |
| C | -2.37683300 | 2.69986700  | 0.20038500  |
| C | -4.54312100 | 2.15383000  | 1.12814200  |
| C | -1.05131000 | 2.41328900  | -0.23621400 |
| C | -2.83587700 | 4.06366500  | 0.18015700  |
| C | -4.87930100 | 3.52330300  | 1.07364300  |
| H | -5.25555300 | 1.44217800  | 1.53103700  |
| C | -0.21741100 | 3.43651700  | -0.66301800 |
| H | -0.66847200 | 1.39707300  | -0.24300500 |
| C | -1.96221700 | 5.07748300  | -0.29981900 |
| H | -5.85676400 | 3.85316200  | 1.42365300  |
| C | -0.69186800 | 4.77742300  | -0.71238600 |
| H | -2.33583000 | 6.09684900  | -0.31328800 |
| H | -0.01289700 | 5.54779000  | -1.06522300 |
| C | -3.46634300 | -0.40315000 | -0.65768300 |
| H | -3.09969900 | 0.25469100  | -1.44912500 |
| C | -4.99235800 | -0.63655400 | -0.80196900 |
| C | -2.93765900 | -2.07595900 | -2.39760900 |
| C | -3.27526000 | -2.85960500 | -0.08761700 |
| C | -5.24471700 | -2.02847400 | -1.41635900 |
| H | -5.47611200 | -0.58131900 | 0.17632100  |
| H | -5.42297900 | 0.14752000  | -1.43169000 |
| C | -4.44553600 | -2.16229000 | -2.72692000 |
| H | -2.41851900 | -1.30307600 | -2.96794500 |
| H | -2.40777900 | -3.01841700 | -2.54465300 |
| C | -4.76516200 | -3.10760900 | -0.42411500 |
| H | -3.12693500 | -2.56744800 | 0.94997800  |

|   |             |             |             |
|---|-------------|-------------|-------------|
| H | -2.63403100 | -3.71370200 | -0.31309600 |
| H | -6.31350500 | -2.15332300 | -1.61476600 |
| H | -4.66737200 | -3.11689600 | -3.21482900 |
| H | -5.36218800 | -3.06950700 | 0.49228800  |
| H | -4.89662200 | -4.10356800 | -0.86038500 |
| O | 1.06013600  | 3.26603000  | -1.06723400 |
| N | -4.07027500 | 4.45315400  | 0.60640800  |
| N | -2.76844100 | -1.72620000 | -0.93903600 |
| H | 1.45297000  | 2.39902400  | -0.82084100 |
| H | -1.92296800 | 0.06841800  | 0.78163500  |
| O | -3.67051400 | -0.45647600 | 1.74127300  |
| C | -3.07400100 | -0.25433100 | 3.01978500  |
| H | -3.09314800 | 0.80192100  | 3.31651600  |
| H | -3.66371900 | -0.83571200 | 3.73337900  |
| H | -2.03493700 | -0.61138800 | 3.03306400  |
| C | 1.82169700  | -1.41813800 | -1.74038400 |
| H | 2.28962800  | -2.09367300 | -2.44372300 |
| H | -1.73363700 | -1.57903500 | -0.78417000 |
| H | 1.92637800  | -0.34997500 | -1.85938500 |
| N | 0.55189700  | -1.79061800 | -1.37741300 |
| O | -0.21257300 | -0.89889000 | -0.86055900 |
| O | 0.16086200  | -2.98109800 | -1.46348800 |
| H | -4.72952700 | -1.36716700 | -3.42441600 |
| C | 1.00990200  | -1.04586200 | 3.00017300  |
| C | 0.84623300  | -2.40336900 | 3.28783700  |
| C | 1.41117200  | -3.39041800 | 2.46913500  |
| C | 2.14540500  | -2.97316200 | 1.36372200  |
| C | 2.31150200  | -1.60576000 | 1.05220500  |
| C | 1.73810200  | -0.63982800 | 1.87231500  |
| N | 2.84691100  | -3.77186200 | 0.45277800  |
| C | 3.54871300  | -2.99846500 | -0.45472700 |
| C | 3.19097700  | -1.53027400 | -0.15069100 |
| O | 4.28630900  | -3.42105900 | -1.32692300 |
| H | 0.57635300  | -0.29673600 | 3.65672800  |
| H | 0.27959400  | -2.70496400 | 4.16510900  |
| H | 1.29513300  | -4.44365100 | 2.70456000  |
| H | 1.85586000  | 0.41054200  | 1.63591700  |
| C | 2.88175600  | -5.21876100 | 0.46325000  |
| H | 3.28836800  | -5.59506800 | 1.40921200  |
| H | 1.87775600  | -5.63251600 | 0.31460000  |
| H | 3.52816200  | -5.53680500 | -0.35644200 |
| N | 4.13032300  | -0.63027800 | -0.43850600 |
| C | 3.88678300  | 0.69612500  | -0.33429300 |
| O | 2.77495300  | 1.25485000  | -0.40139000 |

|   |            |            |             |
|---|------------|------------|-------------|
| O | 5.05208100 | 1.37167200 | -0.22300300 |
| C | 5.13515200 | 2.83698100 | -0.22113600 |
| C | 6.63478900 | 3.07600800 | -0.01763500 |
| H | 6.85040600 | 4.14999100 | -0.01318600 |
| H | 6.97011700 | 2.65230500 | 0.93521900  |
| H | 7.21409500 | 2.60929000 | -0.82140900 |
| C | 4.33939400 | 3.43298900 | 0.94553100  |
| H | 3.26409900 | 3.33473200 | 0.79129300  |
| H | 4.61040700 | 2.93694300 | 1.88470500  |
| H | 4.57893400 | 4.49812200 | 1.04611100  |
| C | 4.68622700 | 3.39192300 | -1.57706900 |
| H | 4.90045600 | 4.46601900 | -1.62637800 |
| H | 5.23326500 | 2.90038400 | -2.38952600 |
| H | 3.61585800 | 3.25260000 | -1.73769000 |

### 3.2 MODE b

#### **b-N-gau1-anti-S**

|   |             |             |             |
|---|-------------|-------------|-------------|
| C | 2.23729000  | -1.63426800 | -0.28932300 |
| C | 3.58202000  | -0.97942700 | -0.60722000 |
| C | 3.66551700  | 0.37831800  | -1.05489600 |
| C | 4.75761100  | -1.67873900 | -0.42021100 |
| C | 2.53851000  | 1.18139800  | -1.36120400 |
| C | 4.98285800  | 0.93004800  | -1.21794300 |
| C | 6.00115300  | -1.04029500 | -0.62890900 |
| H | 4.73302700  | -2.72068700 | -0.11942400 |
| C | 2.69877900  | 2.48014500  | -1.82609900 |
| H | 1.53008700  | 0.79197300  | -1.28068200 |
| C | 5.10916800  | 2.28170000  | -1.64196800 |
| H | 6.92387700  | -1.59840500 | -0.47302500 |
| C | 4.00418700  | 3.03876600  | -1.93650900 |
| H | 6.11250500  | 2.68493100  | -1.74295800 |
| H | 4.09683500  | 4.06419400  | -2.28217300 |
| C | 1.86354100  | -1.31482400 | 1.17954400  |
| H | 2.02338700  | -0.24356000 | 1.31679300  |
| C | 2.64298300  | -2.13756200 | 2.24261300  |
| C | 0.07152800  | -0.98283800 | 2.85655800  |
| C | -0.09073300 | -2.92041800 | 1.34839100  |
| C | 1.65932900  | -2.89663900 | 3.15443600  |
| H | 3.30214900  | -2.85164400 | 1.74608200  |
| H | 3.27100700  | -1.46818000 | 2.83898300  |
| C | 0.77563600  | -1.88000600 | 3.89720400  |
| H | 0.39973300  | 0.05458000  | 2.88440200  |
| H | -1.01595200 | -0.99183400 | 2.95088700  |

|   |             |             |             |
|---|-------------|-------------|-------------|
| C | 0.76322700  | -3.80051100 | 2.28731400  |
| H | -0.00792900 | -3.20413700 | 0.30405700  |
| H | -1.14692900 | -2.91041400 | 1.62768100  |
| H | 2.22030700  | -3.50372600 | 3.87175200  |
| H | 0.03548800  | -2.40058200 | 4.51430200  |
| H | 1.38319000  | -4.47810100 | 1.69367100  |
| H | 0.11192100  | -4.41072500 | 2.92191600  |
| O | 1.66782400  | 3.26090900  | -2.19120400 |
| N | 6.12549800  | 0.22018900  | -0.99662500 |
| N | 0.37270300  | -1.48732100 | 1.46114000  |
| H | 0.84495300  | 2.70703400  | -2.27557400 |
| H | 1.45577000  | -1.22516500 | -0.93986500 |
| O | 2.27878800  | -3.04768200 | -0.44994200 |
| C | 2.17159200  | -3.46692900 | -1.80903600 |
| H | 3.00721900  | -3.09534500 | -2.41615900 |
| H | 2.19779900  | -4.56015200 | -1.80004400 |
| H | 1.22593600  | -3.12791500 | -2.25143100 |
| C | -2.57257600 | 1.14138500  | -2.43156500 |
| H | -3.47412800 | 1.67134800  | -2.16522200 |
| H | -0.18268000 | -0.88187500 | 0.80800900  |
| H | -2.55170500 | 0.48177200  | -3.28856500 |
| N | -1.42104600 | 1.84101500  | -2.21065400 |
| O | -0.34828900 | 1.50065800  | -2.80989900 |
| O | -1.40990500 | 2.75107600  | -1.34604700 |
| H | 1.38323000  | -1.26397300 | 4.56806300  |
| C | -6.39768200 | 0.11902000  | 0.03146800  |
| C | -6.70460300 | -0.99212800 | -0.75615400 |
| C | -5.69070200 | -1.73992500 | -1.36853500 |
| C | -4.37605100 | -1.34031000 | -1.16321300 |
| C | -4.04072700 | -0.21111200 | -0.37516100 |
| C | -5.06912100 | 0.51749900  | 0.22519400  |
| N | -3.22153100 | -1.95684000 | -1.66391000 |
| C | -2.09370300 | -1.31083600 | -1.21261300 |
| C | -2.55630500 | -0.10797800 | -0.39300400 |
| O | -0.93758800 | -1.68256000 | -1.39206900 |
| H | -7.19684000 | 0.68705600  | 0.49908100  |
| H | -7.74094000 | -1.28597200 | -0.89971300 |
| H | -5.92713700 | -2.60597700 | -1.97846800 |
| H | -4.82479700 | 1.38307600  | 0.82485000  |
| C | -3.19921700 | -3.13037700 | -2.51260500 |
| H | -3.67128900 | -3.98433000 | -2.01302400 |
| H | -3.72116200 | -2.93836400 | -3.45684100 |
| H | -2.15526700 | -3.36892100 | -2.72153700 |
| N | -1.62380800 | 0.43163800  | 0.36881100  |

|   |             |            |            |
|---|-------------|------------|------------|
| C | -1.85913900 | 1.55017400 | 1.16261400 |
| O | -2.91893800 | 2.11913600 | 1.37928800 |
| O | -0.67849300 | 1.91254300 | 1.72745700 |
| C | -0.53661200 | 3.17826900 | 2.46768000 |
| C | 0.95607200  | 3.19826000 | 2.81011200 |
| H | 1.21047500  | 4.12597500 | 3.33369700 |
| H | 1.22481500  | 2.35849000 | 3.46201300 |
| H | 1.56197200  | 3.13895000 | 1.89984000 |
| C | -1.38266200 | 3.15465700 | 3.74487400 |
| H | -2.44869600 | 3.14007200 | 3.51330900 |
| H | -1.14294000 | 2.27420800 | 4.35319000 |
| H | -1.16569800 | 4.04569900 | 4.34553200 |
| C | -0.88442900 | 4.36151100 | 1.55901400 |
| H | -0.64097600 | 5.29804900 | 2.07431200 |
| H | -0.30578000 | 4.31351900 | 0.63169900 |
| H | -1.94516700 | 4.36948900 | 1.30351100 |

**b-O-gau1-anti-S**

|   |             |             |             |
|---|-------------|-------------|-------------|
| C | -2.65777800 | 0.78994800  | -1.19039400 |
| C | -4.09857200 | 0.50476300  | -0.77024200 |
| C | -4.39317800 | -0.46392300 | 0.24280500  |
| C | -5.14744800 | 1.18874900  | -1.34900000 |
| C | -3.40903900 | -1.24208400 | 0.90441600  |
| C | -5.77484200 | -0.63523600 | 0.59564000  |
| C | -6.47296800 | 0.93272800  | -0.92893800 |
| H | -4.95844700 | 1.91760000  | -2.13000200 |
| C | -3.76886700 | -2.15382000 | 1.88720300  |
| H | -2.35653200 | -1.14084500 | 0.66594400  |
| C | -6.10878600 | -1.57910500 | 1.60585700  |
| H | -7.29680900 | 1.47641800  | -1.39021000 |
| C | -5.13966400 | -2.31572200 | 2.23779400  |
| H | -7.15879100 | -1.69419500 | 1.85848600  |
| H | -5.39119500 | -3.03702800 | 3.00978900  |
| C | -1.99424000 | 1.72958700  | -0.15691500 |
| H | -2.20152300 | 1.30576800  | 0.82751400  |
| C | -2.45944700 | 3.20516100  | -0.22151900 |
| C | 0.09215600  | 2.28437000  | 1.05234300  |
| C | 0.06873700  | 2.51751900  | -1.39730100 |
| C | -1.25033800 | 4.13204200  | 0.01277100  |
| H | -2.90278700 | 3.41688800  | -1.19852100 |
| H | -3.22962800 | 3.37197800  | 0.53732200  |
| C | -0.51844900 | 3.68325200  | 1.29130000  |
| H | -0.12966500 | 1.56464500  | 1.83985700  |
| H | 1.17171700  | 2.31594300  | 0.90974800  |



|   |             |             |             |
|---|-------------|-------------|-------------|
| C | -0.29116600 | 4.00642400  | -1.18762100 |
| H | -0.38411300 | 2.10423500  | -2.29586800 |
| H | 1.14320000  | 2.32850800  | -1.40935200 |
| H | -1.59045400 | 5.16742200  | 0.11372900  |
| H | 0.27603400  | 4.39143300  | 1.54944100  |
| H | -0.76542700 | 4.40178400  | -2.09180800 |
| H | 0.61379700  | 4.59718100  | -1.00873800 |
| O | -2.88023300 | -2.91575600 | 2.54822300  |
| N | -6.78970700 | 0.06151700  | 0.00917100  |
| N | -0.46987000 | 1.71785200  | -0.23376500 |
| H | -1.95889700 | -2.75912000 | 2.20597800  |
| H | -2.09854800 | -0.15224000 | -1.20688100 |
| O | -2.58043400 | 1.39635800  | -2.47667500 |
| C | -2.68288000 | 0.46689900  | -3.55137400 |
| H | -3.64721300 | -0.05732700 | -3.54883900 |
| H | -2.59569500 | 1.04546300  | -4.47499900 |
| H | -1.87368100 | -0.27558100 | -3.51222700 |
| C | 1.74451200  | -1.95099400 | 1.71191200  |
| H | 2.31923200  | -1.20371500 | 2.24111300  |
| H | -0.13452400 | 0.73523200  | -0.34306800 |
| H | 2.09491400  | -2.97276800 | 1.67747600  |
| N | 0.38115100  | -1.84256800 | 1.85992000  |
| O | -0.34272300 | -2.85064800 | 1.56792000  |
| O | -0.13906800 | -0.75241500 | 2.20352700  |
| H | -1.21796300 | 3.65873100  | 2.13402300  |
| C | 5.39217200  | -3.45517900 | -0.68792900 |
| C | 4.69635000  | -4.46478100 | -1.35639600 |
| C | 3.32785100  | -4.33923300 | -1.63272200 |
| C | 2.69246700  | -3.17533200 | -1.22113900 |
| C | 3.37668100  | -2.14638400 | -0.53502500 |
| C | 4.73586900  | -2.29136400 | -0.26629800 |
| N | 1.34256700  | -2.82739700 | -1.40528400 |
| C | 1.09768000  | -1.57854800 | -0.90830800 |
| C | 2.37659700  | -1.07594000 | -0.26392000 |
| O | 0.02952700  | -0.96605700 | -0.99636000 |
| H | 6.45173000  | -3.57509100 | -0.48137500 |
| H | 5.21835200  | -5.36514100 | -1.66859500 |
| H | 2.78972600  | -5.12400700 | -2.15454800 |
| H | 5.26443100  | -1.51996100 | 0.27915500  |
| C | 0.33218200  | -3.68337600 | -1.99640500 |
| H | 0.58568700  | -3.92337400 | -3.03470100 |
| H | 0.23634000  | -4.61134700 | -1.42311600 |
| H | -0.61695900 | -3.14747400 | -1.96989500 |
| N | 2.48244300  | 0.23674000  | -0.14218500 |

|   |            |            |             |
|---|------------|------------|-------------|
| C | 3.55580900 | 0.79232400 | 0.50368800  |
| O | 4.28505000 | 0.25570200 | 1.33716800  |
| O | 3.65318300 | 2.10332000 | 0.14702700  |
| C | 4.72944600 | 2.96443100 | 0.66169100  |
| C | 4.46831200 | 4.29046500 | -0.05731900 |
| H | 5.21886000 | 5.03301800 | 0.23378600  |
| H | 4.51484300 | 4.15996100 | -1.14384900 |
| H | 3.47924200 | 4.68475200 | 0.20076100  |
| C | 6.09789400 | 2.40301300 | 0.26052900  |
| H | 6.31035300 | 1.46395800 | 0.77410500  |
| H | 6.13821900 | 2.23000000 | -0.82100600 |
| H | 6.88144300 | 3.12504800 | 0.51711000  |
| C | 4.59617700 | 3.14071900 | 2.17783500  |
| H | 5.33839300 | 3.86570300 | 2.53178400  |
| H | 3.60236000 | 3.52581300 | 2.43474200  |
| H | 4.75210800 | 2.19644600 | 2.70197700  |

**b-O-gau1-syn-S**

|   |            |             |             |
|---|------------|-------------|-------------|
| C | 2.45361600 | -1.60855300 | -0.25025000 |
| C | 3.74576500 | -0.88996200 | -0.64352600 |
| C | 3.72980200 | 0.45791300  | -1.12416300 |
| C | 4.96624500 | -1.51666800 | -0.49571800 |
| C | 2.54278700 | 1.18947300  | -1.36890100 |
| C | 5.00081700 | 1.07785000  | -1.37666500 |
| C | 6.15852300 | -0.81477800 | -0.78853100 |
| H | 5.01518900 | -2.54583600 | -0.15643000 |
| C | 2.59833600 | 2.48694900  | -1.85510500 |
| H | 1.56844000 | 0.73427200  | -1.24365000 |
| C | 5.02249000 | 2.42121200  | -1.84235800 |
| H | 7.11864200 | -1.31515600 | -0.66588700 |
| C | 3.85867300 | 3.11110000  | -2.07437600 |
| H | 5.99251600 | 2.87637800  | -2.01979100 |
| H | 3.87119000 | 4.13218500  | -2.44434700 |
| C | 2.05313300 | -1.16742700 | 1.17524400  |
| H | 2.00457000 | -0.07647200 | 1.15593400  |
| C | 2.99348000 | -1.64603500 | 2.30761800  |
| C | 0.16394200 | -0.72150600 | 2.70165400  |
| C | 0.53890700 | -3.03965100 | 1.95245800  |
| C | 2.15723800 | -1.98636500 | 3.55699800  |
| H | 3.55340400 | -2.52929000 | 1.98604100  |
| H | 3.71817900 | -0.85724900 | 2.52786500  |
| C | 1.19299700 | -0.82077700 | 3.84993100  |
| H | 0.02673300 | 0.28700100  | 2.31398600  |

|   |             |             |             |
|---|-------------|-------------|-------------|
| H | -0.81865700 | -1.10617900 | 2.98306000  |
| C | 1.32968300  | -3.25256900 | 3.26316600  |
| H | 0.93947800  | -3.61555000 | 1.12181500  |
| H | -0.52577600 | -3.25530000 | 2.05690900  |
| H | 2.81753100  | -2.15756900 | 4.41249700  |
| H | 0.67124300  | -0.98166800 | 4.79897600  |
| H | 1.98725500  | -4.12145000 | 3.15717500  |
| H | 0.64818100  | -3.45859900 | 4.09595500  |
| O | 1.49604600  | 3.20507300  | -2.14244500 |
| N | 6.19187700  | 0.43782400  | -1.20051700 |
| N | 0.63416300  | -1.58420400 | 1.55177500  |
| H | 0.68469600  | 2.63147100  | -2.05598800 |
| H | 1.64625700  | -1.32232000 | -0.93808900 |
| O | 2.60286500  | -3.02320700 | -0.27108400 |
| C | 2.45071100  | -3.58491200 | -1.57298300 |
| H | 3.18509200  | -3.17825800 | -2.28008100 |
| H | 2.61424500  | -4.66100600 | -1.47062800 |
| H | 1.43959900  | -3.40555100 | -1.96316500 |
| C | -2.40327600 | 0.40165900  | -2.49990900 |
| H | -3.09906300 | 1.22132700  | -2.40716100 |
| H | -0.01029400 | -1.44288200 | 0.74150600  |
| H | -2.61056200 | -0.43955600 | -3.14753300 |
| N | -1.08852000 | 0.75418400  | -2.41259600 |
| O | -0.17975500 | -0.01551600 | -2.81212700 |
| O | -0.82114600 | 1.85268400  | -1.81420900 |
| H | 1.75304300  | 0.11630400  | 3.94228800  |
| C | -6.57763900 | 0.18034100  | -0.47407300 |
| C | -6.85491000 | -1.10427100 | -0.94558600 |
| C | -5.82346500 | -2.02540700 | -1.16986300 |
| C | -4.52274100 | -1.61538100 | -0.90674200 |
| C | -4.21666600 | -0.31587800 | -0.43796900 |
| C | -5.26057100 | 0.58437100  | -0.22166800 |
| N | -3.35175900 | -2.37951500 | -1.04116100 |
| C | -2.25890100 | -1.65901200 | -0.63638000 |
| C | -2.73662400 | -0.25994100 | -0.26775300 |
| O | -1.11247400 | -2.10568800 | -0.54417000 |
| H | -7.39061400 | 0.88109700  | -0.30653600 |
| H | -7.88193600 | -1.39977400 | -1.14260100 |
| H | -6.03768400 | -3.02560400 | -1.53301400 |
| H | -5.03826600 | 1.58448600  | 0.12452800  |
| C | -3.30022500 | -3.75803300 | -1.48461900 |
| H | -3.89219500 | -4.40165300 | -0.82377700 |
| H | -3.68170700 | -3.85130600 | -2.50744800 |
| H | -2.25750600 | -4.07719100 | -1.45924200 |

|   |             |            |            |
|---|-------------|------------|------------|
| N | -1.89272600 | 0.44619000 | 0.45210800 |
| C | -2.16254600 | 1.75915700 | 0.79319400 |
| O | -3.09160800 | 2.46473000 | 0.41978500 |
| O | -1.18538400 | 2.18628000 | 1.63639400 |
| C | -1.10083000 | 3.59015000 | 2.06446000 |
| C | 0.16102700  | 3.60199300 | 2.93212200 |
| H | 0.34636600  | 4.61127100 | 3.31491100 |
| H | 0.05210400  | 2.92688700 | 3.78863300 |
| H | 1.03577600  | 3.29021400 | 2.35107800 |
| C | -2.32652100 | 3.96780900 | 2.90308300 |
| H | -3.23634900 | 3.96205100 | 2.30093600 |
| H | -2.45194400 | 3.26595700 | 3.73618000 |
| H | -2.19121200 | 4.97071100 | 3.32446500 |
| C | -0.92001900 | 4.50422900 | 0.84760700 |
| H | -0.71398200 | 5.52680200 | 1.18530300 |
| H | -0.07566700 | 4.17089400 | 0.23449100 |
| H | -1.81533300 | 4.51743700 | 0.22403400 |

**b-N-gau2-syn-S**

|   |            |             |             |
|---|------------|-------------|-------------|
| C | 2.35667600 | -1.45709300 | -0.82671100 |
| C | 3.60153100 | -0.58243000 | -1.01388800 |
| C | 3.52666400 | 0.84488500  | -1.11126100 |
| C | 4.84791400 | -1.17420000 | -1.07624900 |
| C | 2.31129400 | 1.57431200  | -1.11820400 |
| C | 4.77049600 | 1.55700000  | -1.22186700 |
| C | 6.00710200 | -0.37467100 | -1.19357500 |
| H | 4.94396000 | -2.25397500 | -1.04118900 |
| C | 2.31380900 | 2.95612500  | -1.25851100 |
| H | 1.35849600 | 1.06545100  | -1.04504500 |
| C | 4.73840400 | 2.97545300  | -1.31984000 |
| H | 6.98580800 | -0.85171600 | -1.23338700 |
| C | 3.54936000 | 3.65876300  | -1.33662700 |
| H | 5.68857200 | 3.49584500  | -1.39492800 |
| H | 3.51999800 | 4.74040800  | -1.42887100 |
| C | 2.00661100 | -1.54897300 | 0.67685300  |
| H | 1.86791800 | -0.52180400 | 1.02091000  |
| C | 3.05471000 | -2.28280800 | 1.55100600  |
| C | 0.21192900 | -1.84432700 | 2.34983300  |
| C | 0.67675300 | -3.70920200 | 0.80796500  |
| C | 2.34032100 | -3.14838800 | 2.60651400  |
| H | 3.68771800 | -2.91980200 | 0.92702900  |
| H | 3.70291600 | -1.54324500 | 2.02985100  |
| C | 1.30278100 | -2.28818300 | 3.34938300  |
| H | 0.02238800 | -0.77188800 | 2.35529100  |

|   |             |             |             |
|---|-------------|-------------|-------------|
| H | -0.73646600 | -2.36270200 | 2.50589900  |
| C | 1.61269900  | -4.29984500 | 1.88688000  |
| H | 1.01309600  | -3.92343200 | -0.20270100 |
| H | -0.35924300 | -4.03235300 | 0.91304700  |
| H | 3.07390900  | -3.55074900 | 3.31193300  |
| H | 0.84832800  | -2.85700200 | 4.16726800  |
| H | 2.33978400  | -4.96994900 | 1.41686100  |
| H | 1.04013500  | -4.89260500 | 2.60850700  |
| O | 1.19214900  | 3.70325000  | -1.32116000 |
| N | 5.98644400  | 0.94246500  | -1.25353500 |
| N | 0.65183900  | -2.20220200 | 0.94573200  |
| H | 0.39155900  | 3.11821200  | -1.40234700 |
| H | 1.50346500  | -1.00090200 | -1.34740700 |
| O | 2.56035900  | -2.77160700 | -1.33011600 |
| C | 2.43815600  | -2.86604600 | -2.74684500 |
| H | 3.16568600  | -2.22681100 | -3.26252000 |
| H | 2.63202700  | -3.90960300 | -3.00809600 |
| H | 1.42528800  | -2.59342900 | -3.07594100 |
| C | -2.26722900 | 0.41034100  | -2.36439100 |
| H | -3.20099600 | 0.37144000  | -2.90941000 |
| H | -0.07761100 | -1.84113200 | 0.29299400  |
| H | -1.47652400 | -0.29056900 | -2.59109200 |
| N | -1.82143100 | 1.68166300  | -2.09130900 |
| O | -0.63807300 | 1.76941400  | -1.61910600 |
| O | -2.56571500 | 2.67560600  | -2.20012500 |
| H | 1.78990400  | -1.41336300 | 3.79385500  |
| C | -6.29216600 | 1.16268800  | -0.16831500 |
| C | -6.90353000 | 0.01198500  | -0.66676400 |
| C | -6.14397800 | -1.12214400 | -0.98466700 |
| C | -4.77303100 | -1.05786000 | -0.77748700 |
| C | -4.13140300 | 0.09210900  | -0.26117200 |
| C | -4.90604700 | 1.21446000  | 0.03263100  |
| N | -3.83281900 | -2.06946100 | -1.04563800 |
| C | -2.57231800 | -1.65745100 | -0.71468100 |
| C | -2.66985100 | -0.22239800 | -0.20911600 |
| O | -1.55529100 | -2.35416300 | -0.78920000 |
| H | -6.89455000 | 2.03612000  | 0.06486600  |
| H | -7.97977900 | -0.01089100 | -0.81556800 |
| H | -6.61422200 | -2.01693400 | -1.38022900 |
| H | -4.43071700 | 2.10527600  | 0.41546400  |
| C | -4.14824200 | -3.37970600 | -1.57870500 |
| H | -4.82926900 | -3.91651600 | -0.90883600 |
| H | -4.61447300 | -3.29454500 | -2.56657200 |
| H | -3.21472700 | -3.93719900 | -1.66720200 |

|   |             |            |            |
|---|-------------|------------|------------|
| N | -1.63815200 | 0.15734900 | 0.52648500 |
| C | -1.64771200 | 1.31948600 | 1.27180900 |
| O | -2.54979300 | 2.13260300 | 1.42440000 |
| O | -0.44383600 | 1.42669500 | 1.90917100 |
| C | -0.16322500 | 2.55202900 | 2.81691300 |
| C | 1.29152800  | 2.30330500 | 3.22558800 |
| H | 1.62460600  | 3.07981600 | 3.92248800 |
| H | 1.39997300  | 1.33281500 | 3.72374100 |
| H | 1.95164100  | 2.32285500 | 2.35199400 |
| C | -1.08266300 | 2.47728900 | 4.04077400 |
| H | -2.12673900 | 2.62436300 | 3.75861500 |
| H | -0.98439900 | 1.50556600 | 4.53984000 |
| H | -0.80351300 | 3.25528600 | 4.76093500 |
| C | -0.28200300 | 3.89354800 | 2.08512600 |
| H | 0.11763000  | 4.69058500 | 2.72325200 |
| H | 0.29629700  | 3.88073800 | 1.15539700 |
| H | -1.31948800 | 4.12697200 | 1.84385100 |

**b-O-anti-S**

|   |             |             |             |
|---|-------------|-------------|-------------|
| C | -2.68726300 | -0.21103500 | 1.54034400  |
| C | -4.08441900 | 0.20176400  | 1.08087500  |
| C | -4.26768300 | 0.92681700  | -0.14061500 |
| C | -5.20039800 | -0.13250800 | 1.81865000  |
| C | -3.20319500 | 1.32241500  | -0.99070800 |
| C | -5.61626800 | 1.24654700  | -0.51284200 |
| C | -6.48436600 | 0.24692000  | 1.36282000  |
| H | -5.09506400 | -0.68153000 | 2.74830600  |
| C | -3.45614800 | 1.97790400  | -2.18722600 |
| H | -2.17051300 | 1.12444700  | -0.72780600 |
| C | -5.83843500 | 1.95048300  | -1.72901500 |
| H | -7.36201400 | -0.01432500 | 1.95314800  |
| C | -4.79502700 | 2.30298500  | -2.54743000 |
| H | -6.86471100 | 2.19090200  | -1.99068100 |
| H | -4.96290400 | 2.82932600  | -3.48236800 |
| C | -2.18338900 | -1.39130600 | 0.67953400  |
| H | -2.38533700 | -1.12759900 | -0.35962700 |
| C | -2.80369700 | -2.76952200 | 1.00332900  |
| C | -0.22936300 | -2.32511200 | -0.49929500 |
| C | -0.18665100 | -2.25341400 | 1.96518400  |
| C | -1.73030200 | -3.85851900 | 0.80091400  |
| H | -3.16524800 | -2.79047000 | 2.03562900  |
| H | -3.66251200 | -2.93652300 | 0.34633900  |
| C | -1.04132200 | -3.63815400 | -0.56156200 |
| H | -0.37727200 | -1.67287200 | -1.36231900 |

|   |             |             |             |
|---|-------------|-------------|-------------|
| H | 0.83934100  | -2.49660900 | -0.37354900 |
| C | -0.67694300 | -3.71874300 | 1.91883900  |
| H | -0.60003400 | -1.70422900 | 2.80970600  |
| H | 0.89999400  | -2.15990300 | 1.96228800  |
| H | -2.19082000 | -4.85039000 | 0.83713300  |
| H | -0.37019000 | -4.47148800 | -0.79361900 |
| H | -1.10867500 | -3.99272600 | 2.88690100  |
| H | 0.16220400  | -4.39819900 | 1.73189800  |
| O | -2.48763700 | 2.33534500  | -3.04959300 |
| N | -6.70047100 | 0.90764800  | 0.24195100  |
| N | -0.66582900 | -1.54493800 | 0.71980100  |
| H | -1.61613700 | 1.95989600  | -2.76136200 |
| H | -2.00514300 | 0.63406100  | 1.38931300  |
| O | -2.65362900 | -0.59141000 | 2.91154600  |
| C | -2.54943100 | 0.51241100  | 3.80638700  |
| H | -3.40512100 | 1.19414900  | 3.71875000  |
| H | -2.52902300 | 0.09585000  | 4.81689500  |
| H | -1.62411000 | 1.07925600  | 3.63174300  |
| C | 2.04360800  | 1.07770700  | -2.01414000 |
| H | 2.11319100  | 0.02358400  | -2.24119500 |
| H | -0.21674300 | -0.60056400 | 0.67884600  |
| H | 2.85703300  | 1.72877800  | -2.29993300 |
| N | 0.80013400  | 1.62706400  | -2.27022900 |
| O | 0.66233400  | 2.86940700  | -2.34177700 |
| O | -0.21009300 | 0.85451900  | -2.36517200 |
| H | -1.79080800 | -3.59264500 | -1.35929600 |
| C | 5.73754900  | 2.88943700  | 0.17050700  |
| C | 5.13307800  | 4.11669900  | 0.45104200  |
| C | 3.74657300  | 4.21475200  | 0.63084100  |
| C | 3.00031500  | 3.04944200  | 0.52192400  |
| C | 3.59001700  | 1.80170700  | 0.22249800  |
| C | 4.96979400  | 1.72376500  | 0.04689700  |
| N | 1.61130000  | 2.90566200  | 0.69326300  |
| C | 1.24417200  | 1.60074200  | 0.55063000  |
| C | 2.48123300  | 0.80520500  | 0.17452700  |
| O | 0.10390300  | 1.15451800  | 0.72347600  |
| H | 6.81394700  | 2.83665300  | 0.03470900  |
| H | 5.74163000  | 5.01321600  | 0.53240700  |
| H | 3.27749400  | 5.16794300  | 0.85188700  |
| H | 5.43133800  | 0.77659100  | -0.20181000 |
| C | 0.68449000  | 3.99582300  | 0.93192000  |
| H | 0.92617800  | 4.50974900  | 1.86854800  |
| H | 0.71850900  | 4.71045300  | 0.10399400  |
| H | -0.31880000 | 3.57437700  | 0.99975000  |

|   |            |             |             |
|---|------------|-------------|-------------|
| N | 2.43424400 | -0.49079400 | 0.44595000  |
| C | 3.45988900 | -1.31833400 | 0.07609100  |
| O | 4.30644900 | -1.12056500 | -0.79449700 |
| O | 3.35517100 | -2.48468900 | 0.77623400  |
| C | 4.33257100 | -3.57104800 | 0.61481800  |
| C | 3.84570100 | -4.61227700 | 1.62653300  |
| H | 4.49791300 | -5.49199400 | 1.60975100  |
| H | 3.84896900 | -4.20067200 | 2.64164000  |
| H | 2.82636700 | -4.93825100 | 1.39068400  |
| C | 5.73722600 | -3.08421600 | 0.98794000  |
| H | 6.10568800 | -2.34692400 | 0.27280100  |
| H | 5.73287400 | -2.63499200 | 1.98776700  |
| H | 6.43093300 | -3.93279300 | 1.00141100  |
| C | 4.27561000 | -4.13671400 | -0.80813100 |
| H | 4.92541200 | -5.01656000 | -0.88268800 |
| H | 3.25531900 | -4.45176000 | -1.05695300 |
| H | 4.60285400 | -3.39720200 | -1.54072700 |

**b-N-gau1-anti-R (re-ts2b)**

|   |             |             |             |
|---|-------------|-------------|-------------|
| C | -2.87017500 | -1.37369900 | 0.58565800  |
| C | -4.23651000 | -0.73089500 | 0.35289200  |
| C | -4.34820600 | 0.68699500  | 0.19936800  |
| C | -5.38143900 | -1.49055300 | 0.24269900  |
| C | -3.25203300 | 1.57080500  | 0.33592000  |
| C | -5.64477700 | 1.21930400  | -0.10320400 |
| C | -6.61692000 | -0.85922900 | -0.04036400 |
| H | -5.34271000 | -2.56686500 | 0.37467000  |
| C | -3.41967800 | 2.93472400  | 0.17381100  |
| H | -2.26690600 | 1.20618900  | 0.59997200  |
| C | -5.77736800 | 2.62392700  | -0.28296900 |
| H | -7.51837900 | -1.46485200 | -0.12830100 |
| C | -4.69738500 | 3.46411500  | -0.15395500 |
| H | -6.76490000 | 3.01029400  | -0.51759600 |
| H | -4.79963900 | 4.53791600  | -0.28028800 |
| C | -2.15932300 | -1.55204400 | -0.78286000 |
| H | -2.37598300 | -0.66090600 | -1.37361300 |
| C | -2.55842700 | -2.84090000 | -1.55289300 |
| C | -0.02980500 | -1.58655900 | -2.05396000 |
| C | -0.10072200 | -2.68196500 | 0.15501600  |
| C | -1.31409000 | -3.72095800 | -1.78816100 |
| H | -3.29804300 | -3.39806000 | -0.97483700 |
| H | -3.01733800 | -2.57270600 | -2.51002600 |
| C | -0.32559500 | -2.96108900 | -2.68978900 |
| H | -0.46795000 | -0.75612300 | -2.60743000 |



|   |             |             |             |
|---|-------------|-------------|-------------|
| H | 1.03111900  | -1.38224100 | -1.90936100 |
| C | -0.63298100 | -4.00677900 | -0.43508300 |
| H | -0.40994200 | -2.52003400 | 1.18607800  |
| H | 0.98493800  | -2.59662100 | 0.09680600  |
| H | -1.61485000 | -4.66074200 | -2.26167900 |
| H | 0.60020600  | -3.53583400 | -2.80292200 |
| H | -1.35032800 | -4.46050100 | 0.25345700  |
| H | 0.19593200  | -4.70936900 | -0.57062100 |
| O | -2.39378700 | 3.80465100  | 0.32027000  |
| N | -6.75860000 | 0.43955400  | -0.22146700 |
| N | -0.63821300 | -1.53496700 | -0.66545000 |
| H | -1.62328300 | 3.31410300  | 0.69151300  |
| H | -2.26182800 | -0.70740500 | 1.20892000  |
| O | -2.96700700 | -2.64023200 | 1.22521700  |
| C | -3.18633200 | -2.55363800 | 2.63018600  |
| H | -4.13849400 | -2.06133200 | 2.86619400  |
| H | -3.21422200 | -3.58026000 | 3.00468800  |
| H | -2.37284000 | -2.00871200 | 3.12972300  |
| C | 1.68338500  | 1.54027300  | 1.88602700  |
| H | 2.05911400  | 2.52329700  | 2.13366900  |
| H | -0.33101700 | -0.63957600 | -0.24205900 |
| H | 2.17114500  | 0.66065800  | 2.28179100  |
| N | 0.31591600  | 1.47603800  | 1.80732600  |
| O | -0.25070500 | 0.34634500  | 1.72394500  |
| O | -0.34451300 | 2.55618800  | 1.74371700  |
| H | -0.74737600 | -2.82352100 | -3.69089700 |
| C | 5.64037700  | 3.21566600  | 0.14173500  |
| C | 5.09010600  | 4.37917100  | -0.40117200 |
| C | 3.75316500  | 4.42049700  | -0.81874100 |
| C | 2.99654500  | 3.26393400  | -0.67640000 |
| C | 3.53294200  | 2.07997800  | -0.12129500 |
| C | 4.86348500  | 2.05942100  | 0.29095900  |
| N | 1.65628800  | 3.07091800  | -1.04388000 |
| C | 1.26817800  | 1.77443300  | -0.80725700 |
| C | 2.44370000  | 1.06335100  | -0.14381900 |
| O | 0.17057300  | 1.29498900  | -1.08069500 |
| H | 6.67858600  | 3.20717600  | 0.46084600  |
| H | 5.70353700  | 5.27035200  | -0.50330100 |
| H | 3.32830500  | 5.32403900  | -1.24405400 |
| H | 5.27861400  | 1.16487200  | 0.73809500  |
| C | 0.77942100  | 4.09739100  | -1.57334100 |
| H | 1.13456400  | 4.45010900  | -2.54829300 |
| H | -0.21541600 | 3.66520900  | -1.68561100 |
| H | 0.72415900  | 4.94543500  | -0.88271600 |

|   |            |             |             |
|---|------------|-------------|-------------|
| N | 2.47520700 | -0.25597900 | -0.26804300 |
| C | 3.42582100 | -0.99197800 | 0.38566300  |
| O | 4.04363000 | -0.67633900 | 1.40359700  |
| O | 3.53459400 | -2.21103600 | -0.21338100 |
| C | 4.49633900 | -3.21804100 | 0.25928300  |
| C | 4.31778800 | -4.35368000 | -0.75248000 |
| H | 4.98785000 | -5.18533400 | -0.50944900 |
| H | 3.28875900 | -4.72930400 | -0.74179900 |
| H | 4.54814100 | -4.01101700 | -1.76708900 |
| C | 4.12636200 | -3.68985700 | 1.66939300  |
| H | 4.21160500 | -2.87699900 | 2.39252600  |
| H | 3.09981900 | -4.07412700 | 1.69083300  |
| H | 4.79504600 | -4.50306700 | 1.97487900  |
| C | 5.92617400 | -2.67018300 | 0.18994500  |
| H | 6.63809100 | -3.47850400 | 0.39251100  |
| H | 6.13708000 | -2.27704200 | -0.81122500 |
| H | 6.08624700 | -1.87569000 | 0.92033900  |

**b-O-gau1-syn-R**

|   |             |             |             |
|---|-------------|-------------|-------------|
| C | -2.11380200 | 0.69749900  | -1.09969500 |
| C | -3.22649800 | -0.26451000 | -0.68038600 |
| C | -3.12841200 | -1.00071300 | 0.54323200  |
| C | -4.36618700 | -0.41714000 | -1.44096100 |
| C | -2.00318600 | -0.93921700 | 1.39871500  |
| C | -4.24431100 | -1.82161800 | 0.91325800  |
| C | -5.39879200 | -1.27659600 | -0.99395800 |
| H | -4.47681400 | 0.12104300  | -2.37625600 |
| C | -1.98511400 | -1.62365700 | 2.60288400  |
| H | -1.12901100 | -0.35858500 | 1.13309500  |
| C | -4.18377600 | -2.53418300 | 2.14343900  |
| H | -6.29490800 | -1.39613400 | -1.60207600 |
| C | -3.09234000 | -2.43651200 | 2.97293000  |
| H | -5.03591200 | -3.15328300 | 2.40820800  |
| H | -3.05228800 | -2.97135300 | 3.91723900  |
| C | -2.17878100 | 1.96349500  | -0.21768700 |
| H | -2.21282600 | 1.61997800  | 0.81670500  |
| C | -3.36040100 | 2.92156800  | -0.49196000 |
| C | -0.82004900 | 3.64918500  | 0.96695000  |
| C | -0.83822100 | 3.67495200  | -1.50296500 |
| C | -2.89384100 | 4.37299500  | -0.25037200 |
| H | -3.71043500 | 2.80819400  | -1.52268300 |
| H | -4.19036700 | 2.66162200  | 0.17128200  |
| C | -2.13906500 | 4.44323900  | 1.09404500  |
| H | -0.61129800 | 2.97870000  | 1.80195400  |

|   |             |             |             |
|---|-------------|-------------|-------------|
| H | 0.05060900  | 4.29268700  | 0.83162400  |
| C | -1.92366200 | 4.76652600  | -1.38229300 |
| H | -0.99469300 | 3.02361300  | -2.36080700 |
| H | 0.17595900  | 4.07440000  | -1.53523700 |
| H | -3.75505400 | 5.04747000  | -0.23857500 |
| H | -1.91641100 | 5.48223400  | 1.35745800  |
| H | -2.45893300 | 4.85620600  | -2.33313400 |
| H | -1.47105400 | 5.74130200  | -1.16932400 |
| O | -0.94274600 | -1.55222600 | 3.45780200  |
| N | -5.36044400 | -1.95073400 | 0.13914500  |
| N | -0.90051300 | 2.79037000  | -0.27856500 |
| H | -0.31020100 | -0.86785100 | 3.12784600  |
| H | -1.14030300 | 0.21417800  | -0.93061100 |
| O | -2.20947700 | 1.07899600  | -2.46619700 |
| C | -1.62087600 | 0.13733400  | -3.36336300 |
| H | -2.14618700 | -0.82572400 | -3.34443400 |
| H | -1.70509300 | 0.56864800  | -4.36449200 |
| H | -0.56284200 | -0.03164900 | -3.12359300 |
| C | 2.57012900  | 0.20435200  | 2.10588400  |
| H | 3.56326500  | 0.56351000  | 2.33917700  |
| H | -0.04927300 | 2.19145500  | -0.28917400 |
| H | 2.31863600  | -0.83472300 | 2.27044500  |
| N | 1.57660200  | 1.10295700  | 2.41911400  |
| O | 0.36402600  | 0.69803200  | 2.48139600  |
| O | 1.84013800  | 2.32016700  | 2.54909300  |
| H | -2.76047800 | 4.03141400  | 1.89680900  |
| C | 5.97124900  | -1.90859200 | -0.15872000 |
| C | 6.75829800  | -0.77206000 | -0.35448500 |
| C | 6.17702400  | 0.49963200  | -0.44437300 |
| C | 4.79459300  | 0.58483300  | -0.33792000 |
| C | 3.97997300  | -0.55078700 | -0.13736000 |
| C | 4.57839200  | -1.80564700 | -0.04289700 |
| N | 4.00467100  | 1.74351400  | -0.41659700 |
| C | 2.67296100  | 1.43163900  | -0.33139800 |
| C | 2.56360200  | -0.06911800 | -0.09757400 |
| O | 1.75576100  | 2.24342200  | -0.45787900 |
| H | 6.44156000  | -2.88507500 | -0.08685000 |
| H | 7.83756000  | -0.86841700 | -0.43657600 |
| H | 6.78748500  | 1.38366700  | -0.59838100 |
| H | 3.97036300  | -2.68315200 | 0.13540700  |
| C | 4.51386300  | 3.09020800  | -0.58321400 |
| H | 5.05894800  | 3.18663300  | -1.52896100 |
| H | 3.66169500  | 3.77073600  | -0.58704700 |
| H | 5.18215200  | 3.35424000  | 0.24362300  |

|   |             |             |             |
|---|-------------|-------------|-------------|
| N | 1.43935900  | -0.64365700 | -0.49355100 |
| C | 1.26162900  | -1.99402500 | -0.30764700 |
| O | 1.75589500  | -2.68575800 | 0.58266500  |
| O | 0.38393600  | -2.46228500 | -1.23013800 |
| C | 0.06001200  | -3.89472000 | -1.32702400 |
| C | -0.90761000 | -3.93875800 | -2.51292400 |
| H | -1.21885900 | -4.97076200 | -2.70782300 |
| H | -1.80357600 | -3.34412600 | -2.30565100 |
| H | -0.43199300 | -3.54594800 | -3.41837300 |
| C | -0.63308500 | -4.38917100 | -0.05369400 |
| H | 0.03188000  | -4.32958400 | 0.80890200  |
| H | -1.52942500 | -3.79586900 | 0.15253900  |
| H | -0.94263300 | -5.43240700 | -0.18812800 |
| C | 1.32627200  | -4.69766600 | -1.64391200 |
| H | 1.05830100  | -5.73777100 | -1.86242500 |
| H | 1.83088800  | -4.28602600 | -2.52574600 |
| H | 2.02364700  | -4.69002500 | -0.80404300 |

**b-O-gau1-anti-R**

|   |             |             |             |
|---|-------------|-------------|-------------|
| C | -2.39719100 | -0.02058700 | -1.01775300 |
| C | -3.59215100 | -0.66521000 | -0.31546100 |
| C | -3.66160100 | -0.72908400 | 1.11317000  |
| C | -4.65273500 | -1.15699500 | -1.04758200 |
| C | -2.62896400 | -0.28268400 | 1.97318500  |
| C | -4.86040000 | -1.27987800 | 1.68178900  |
| C | -5.77978700 | -1.69150500 | -0.38134000 |
| H | -4.62517700 | -1.13723200 | -2.13200900 |
| C | -2.76222200 | -0.37609100 | 3.35232000  |
| H | -1.68937700 | 0.08823300  | 1.58308600  |
| C | -4.97320900 | -1.34596200 | 3.09802100  |
| H | -6.61463200 | -2.07800300 | -0.96519200 |
| C | -3.96047900 | -0.90540400 | 3.91222100  |
| H | -5.88706900 | -1.76319600 | 3.51090500  |
| H | -4.04015900 | -0.96254500 | 4.99388400  |
| C | -2.55433800 | 1.51434500  | -0.95834100 |
| H | -2.79229100 | 1.76632200  | 0.07699900  |
| C | -3.61399200 | 2.10671400  | -1.92086500 |
| C | -1.37156300 | 3.66799100  | -0.71351400 |
| C | -0.84447400 | 2.26026000  | -2.67054000 |
| C | -3.07533600 | 3.41261800  | -2.53733100 |
| H | -3.83971600 | 1.38976400  | -2.71453800 |
| H | -4.53870100 | 2.29260200  | -1.36710700 |
| C | -2.57965700 | 4.33572100  | -1.40748800 |
| H | -1.47078700 | 3.61434000  | 0.37181600  |

|   |             |             |             |
|---|-------------|-------------|-------------|
| H | -0.42427300 | 4.15634100  | -0.94514000 |
| C | -1.89196200 | 3.07289400  | -3.46530300 |
| H | -0.79204200 | 1.22101900  | -2.98755500 |
| H | 0.15506500  | 2.69765600  | -2.70662100 |
| H | -3.86653200 | 3.90819600  | -3.10771000 |
| H | -2.28278300 | 5.31039000  | -1.80795500 |
| H | -2.23932200 | 2.48586900  | -4.32097800 |
| H | -1.44531200 | 3.99267800  | -3.85820200 |
| O | -1.80754100 | 0.01654300  | 4.20952300  |
| N | -5.89789400 | -1.74822600 | 0.93118900  |
| N | -1.24163300 | 2.24618700  | -1.21263300 |
| H | -0.98523400 | 0.29934900  | 3.71147700  |
| H | -1.47114700 | -0.29530800 | -0.49112500 |
| O | -2.29165600 | -0.41034700 | -2.37926700 |
| C | -1.64403300 | -1.67124700 | -2.55865300 |
| H | -2.19957600 | -2.48059500 | -2.06777500 |
| H | -1.62230200 | -1.85613300 | -3.63589900 |
| H | -0.61928000 | -1.64648400 | -2.16893500 |
| C | 2.47484300  | -0.00164600 | 2.46422500  |
| H | 2.91651000  | 0.83532400  | 2.98692600  |
| H | -0.46168400 | 1.81739100  | -0.67202200 |
| H | 2.99337400  | -0.94018200 | 2.34105000  |
| N | 1.12175800  | -0.10695800 | 2.55808400  |
| O | 0.54483000  | -1.14000900 | 2.13799400  |
| O | 0.44577100  | 0.89043600  | 3.01083900  |
| H | -3.38471900 | 4.51216200  | -0.68630900 |
| C | 6.60560300  | -0.03803800 | 0.25377400  |
| C | 6.85989500  | 1.31124900  | 0.50979200  |
| C | 5.81033100  | 2.23124000  | 0.62846100  |
| C | 4.51382100  | 1.75389100  | 0.48016700  |
| C | 4.23203300  | 0.39056800  | 0.23732000  |
| C | 5.29305800  | -0.50761000 | 0.12050000  |
| N | 3.32451400  | 2.49596200  | 0.52906500  |
| C | 2.24002800  | 1.69275000  | 0.27348900  |
| C | 2.75379000  | 0.27191900  | 0.10711200  |
| O | 1.08245300  | 2.10335100  | 0.16787700  |
| H | 7.43277900  | -0.73660400 | 0.16615800  |
| H | 7.88393400  | 1.65793500  | 0.61927000  |
| H | 6.00747000  | 3.28094300  | 0.82184800  |
| H | 5.09743800  | -1.55796300 | -0.04938400 |
| C | 3.24144600  | 3.91584500  | 0.80224700  |
| H | 3.75560300  | 4.49504500  | 0.02633000  |
| H | 2.18657400  | 4.19192500  | 0.81945200  |
| H | 3.68900800  | 4.14732200  | 1.77498700  |

|   |             |             |             |
|---|-------------|-------------|-------------|
| N | 1.95913700  | -0.60428600 | -0.45625000 |
| C | 2.32803100  | -1.93679400 | -0.48546300 |
| O | 3.08152300  | -2.50655400 | 0.29736400  |
| O | 1.67547300  | -2.56406900 | -1.49522300 |
| C | 1.84297000  | -4.01030900 | -1.72421900 |
| C | 0.97018800  | -4.26666600 | -2.95599800 |
| H | 1.04762500  | -5.31704900 | -3.25701500 |
| H | -0.08249200 | -4.05275700 | -2.74404000 |
| H | 1.28983900  | -3.64306300 | -3.79806800 |
| C | 1.31629100  | -4.79862600 | -0.52084300 |
| H | 1.92690100  | -4.62427700 | 0.36631500  |
| H | 0.28343800  | -4.50942300 | -0.29645800 |
| H | 1.32647000  | -5.87084600 | -0.74922700 |
| C | 3.30663400  | -4.33758400 | -2.04171700 |
| H | 3.38624500  | -5.38215100 | -2.36391100 |
| H | 3.67242500  | -3.70401300 | -2.85823100 |
| H | 3.94670500  | -4.19306200 | -1.17042700 |

**b-N-gau2-syn-R**

|   |            |             |             |
|---|------------|-------------|-------------|
| C | 2.47603200 | 0.83290400  | 0.93693500  |
| C | 3.67012400 | 0.01197000  | 0.44732500  |
| C | 3.52977700 | -0.93588900 | -0.61839000 |
| C | 4.91487800 | 0.17432600  | 1.01864400  |
| C | 2.31295900 | -1.18424100 | -1.30250500 |
| C | 4.70803900 | -1.65841100 | -1.00696800 |
| C | 6.00720300 | -0.59780000 | 0.55973000  |
| H | 5.05694000 | 0.88651700  | 1.82415900  |
| C | 2.25956200 | -2.07623400 | -2.36556400 |
| H | 1.39607400 | -0.68248900 | -1.01971500 |
| C | 4.61122700 | -2.59711600 | -2.07184100 |
| H | 6.98565200 | -0.46934300 | 1.02142100  |
| C | 3.42903800 | -2.79957400 | -2.73769600 |
| H | 5.51161300 | -3.13925700 | -2.34573500 |
| H | 3.35754100 | -3.50371700 | -3.56138200 |
| C | 2.09038200 | 1.89530800  | -0.11500600 |
| H | 2.09111500 | 1.40407500  | -1.08804300 |
| C | 3.00752200 | 3.14199900  | -0.14953000 |
| C | 0.22609400 | 3.04549200  | -1.24910400 |
| C | 0.48319000 | 3.34180000  | 1.19581400  |
| C | 2.14715600 | 4.40085500  | -0.36795900 |
| H | 3.56029900 | 3.22919600  | 0.78955400  |
| H | 3.73695900 | 3.02511200  | -0.95679300 |
| C | 1.22743600 | 4.17405200  | -1.58225500 |
| H | 0.18483900 | 2.25693500  | -2.00272200 |

|   |             |             |             |
|---|-------------|-------------|-------------|
| H | -0.78407900 | 3.40960600  | -1.06945100 |
| C | 1.27890200  | 4.62965500  | 0.88455400  |
| H | 0.85419700  | 2.83257900  | 2.08263800  |
| H | -0.58911000 | 3.50477300  | 1.29009100  |
| H | 2.79329600  | 5.26722000  | -0.53943900 |
| H | 0.67887500  | 5.09018900  | -1.82433700 |
| H | 1.91177000  | 4.88598300  | 1.74045700  |
| H | 0.59578500  | 5.47005500  | 0.71916100  |
| O | 1.14695400  | -2.30409300 | -3.08183900 |
| N | 5.92294300  | -1.48407400 | -0.41321200 |
| N | 0.64885100  | 2.37452100  | 0.04397500  |
| H | 0.43663900  | -1.65541800 | -2.83104900 |
| H | 1.61824500  | 0.15887300  | 1.07574900  |
| O | 2.74767000  | 1.49909500  | 2.16444100  |
| C | 2.52058100  | 0.70376100  | 3.32402000  |
| H | 3.15874200  | -0.18904000 | 3.33928800  |
| H | 2.76998800  | 1.33085000  | 4.18441400  |
| H | 1.46920100  | 0.39747200  | 3.39075900  |
| C | -2.60336000 | 0.60321900  | -2.21695100 |
| H | -2.19238200 | 1.60239600  | -2.24149300 |
| H | 0.00877100  | 1.56453700  | 0.20705800  |
| H | -3.61264100 | 0.44132900  | -2.57149200 |
| N | -1.71748800 | -0.37187800 | -2.61896700 |
| O | -2.12136400 | -1.47099100 | -3.04408800 |
| O | -0.46867500 | -0.13901700 | -2.46393400 |
| H | 1.82490100  | 3.91017400  | -2.46169400 |
| C | -5.43833300 | -2.42540500 | -0.13516000 |
| C | -6.50489700 | -1.54110200 | 0.02953600  |
| C | -6.28215300 | -0.16397200 | 0.16334000  |
| C | -4.96708600 | 0.28160600  | 0.14001000  |
| C | -3.87114800 | -0.59711600 | -0.00649100 |
| C | -4.11600900 | -1.96054600 | -0.16391000 |
| N | -4.52006100 | 1.60946100  | 0.23142000  |
| C | -3.14986100 | 1.67605600  | 0.17152100  |
| C | -2.63486900 | 0.24592200  | 0.00798400  |
| O | -2.49060800 | 2.70694300  | 0.27389600  |
| H | -5.63092400 | -3.48764100 | -0.25504200 |
| H | -7.52407100 | -1.91767500 | 0.04640600  |
| H | -7.11113800 | 0.52700400  | 0.27923700  |
| H | -3.29373900 | -2.64216100 | -0.33051700 |
| C | -5.37763800 | 2.76613500  | 0.39268600  |
| H | -5.95355000 | 2.69471500  | 1.32226200  |
| H | -4.73939300 | 3.65007900  | 0.43172400  |
| H | -6.07138300 | 2.85581300  | -0.45075200 |

|   |             |             |             |
|---|-------------|-------------|-------------|
| N | -1.42736800 | 0.00921800  | 0.50456000  |
| C | -1.03154100 | -1.31175400 | 0.69666300  |
| O | -1.15205800 | -2.23862100 | -0.08806500 |
| O | -0.43540300 | -1.42758600 | 1.91511500  |
| C | -0.15302900 | -2.76433300 | 2.48635900  |
| C | 0.33124100  | -2.43693700 | 3.90082400  |
| H | 0.52025900  | -3.36342300 | 4.45371600  |
| H | 1.26173200  | -1.86205300 | 3.87731200  |
| H | -0.42153300 | -1.85816200 | 4.44705500  |
| C | 0.94203800  | -3.48112100 | 1.69307800  |
| H | 0.61749600  | -3.69641000 | 0.67436100  |
| H | 1.85494900  | -2.87771000 | 1.65384800  |
| H | 1.18891000  | -4.42725800 | 2.18926000  |
| C | -1.44280000 | -3.59059600 | 2.55784700  |
| H | -1.26104200 | -4.49301000 | 3.15230000  |
| H | -2.24057000 | -3.01925200 | 3.04605500  |
| H | -1.78342300 | -3.89551900 | 1.56748600  |

**b-O- anti-R**

|   |             |             |             |
|---|-------------|-------------|-------------|
| C | -2.28374800 | 0.99575400  | -0.25154300 |
| C | -3.65618000 | 0.45385200  | -0.66568400 |
| C | -3.93301000 | -0.94875600 | -0.77225600 |
| C | -4.67289200 | 1.34441800  | -0.95238700 |
| C | -2.97174500 | -1.97454600 | -0.57209700 |
| C | -5.27480700 | -1.31493300 | -1.14176500 |
| C | -5.95596500 | 0.86996700  | -1.30163300 |
| H | -4.48701700 | 2.41261400  | -0.92728800 |
| C | -3.31224300 | -3.30937400 | -0.75225600 |
| H | -1.94951400 | -1.74552000 | -0.29245200 |
| C | -5.59680300 | -2.69341800 | -1.27865400 |
| H | -6.75291800 | 1.58121000  | -1.51556100 |
| C | -4.64824000 | -3.66449700 | -1.09333500 |
| H | -6.61756100 | -2.94484700 | -1.55091800 |
| H | -4.88418100 | -4.71764200 | -1.21340800 |
| C | -2.23762300 | 1.19518900  | 1.28225800  |
| H | -2.58532700 | 0.25904400  | 1.72563100  |
| C | -3.06725500 | 2.39429600  | 1.81275900  |
| C | -0.84143800 | 1.12395700  | 3.32237500  |
| C | -0.21132300 | 2.69850100  | 1.53000800  |
| C | -2.27452900 | 3.13462000  | 2.90687600  |
| H | -3.28737600 | 3.08617200  | 0.99644300  |
| H | -4.02021800 | 2.02843200  | 2.20586400  |
| C | -1.82264700 | 2.12178100  | 3.97397000  |
| H | -1.11315700 | 0.08022900  | 3.48000700  |



|   |             |             |             |
|---|-------------|-------------|-------------|
| H | 0.18778600  | 1.26060000  | 3.65833100  |
| C | -1.03013900 | 3.78217100  | 2.26876600  |
| H | -0.22484600 | 2.81883300  | 0.45083700  |
| H | 0.82784700  | 2.63929900  | 1.85252400  |
| H | -2.90600600 | 3.90385700  | 3.36183200  |
| H | -1.33166300 | 2.63445700  | 4.80749500  |
| H | -1.33270600 | 4.56147100  | 1.56176700  |
| H | -0.41963700 | 4.26176400  | 3.04163300  |
| O | -2.44328900 | -4.32998400 | -0.62492000 |
| N | -6.26263300 | -0.40960200 | -1.38758200 |
| N | -0.81863200 | 1.34689300  | 1.82506900  |
| H | -1.52188800 | -3.99194200 | -0.48042600 |
| H | -1.50611800 | 0.27093900  | -0.52718700 |
| O | -2.00189200 | 2.24110500  | -0.87741600 |
| C | -1.62938000 | 2.11828400  | -2.24773800 |
| H | -2.40855400 | 1.61987000  | -2.83821700 |
| H | -1.49431300 | 3.13420100  | -2.62697500 |
| H | -0.68792800 | 1.56159500  | -2.35457800 |
| C | 1.27010900  | -1.76534100 | -1.30448400 |
| H | 2.00951000  | -1.71755100 | -2.09050700 |
| H | -0.19724900 | 0.59569200  | 1.44843100  |
| H | 0.41660500  | -1.10318500 | -1.32757200 |
| N | 0.98777100  | -3.03538400 | -0.85472900 |
| O | -0.05768300 | -3.20416700 | -0.13147800 |
| O | 1.79308600  | -3.97100500 | -1.05017300 |
| H | -2.69022300 | 1.59274700  | 4.38249200  |
| C | 5.92245300  | -1.93765000 | -0.57683500 |
| C | 5.85698000  | -3.03196500 | 0.29088500  |
| C | 4.71699800  | -3.27267100 | 1.06636700  |
| C | 3.65676300  | -2.38254500 | 0.94605500  |
| C | 3.69910700  | -1.27797700 | 0.06756700  |
| C | 4.84283300  | -1.05581400 | -0.69833000 |
| N | 2.44420800  | -2.39413400 | 1.65917800  |
| C | 1.67865600  | -1.31330200 | 1.32163000  |
| C | 2.40833900  | -0.55912800 | 0.22174200  |
| O | 0.59984600  | -1.01067400 | 1.83503300  |
| H | 6.81732100  | -1.77239100 | -1.17006000 |
| H | 6.70061400  | -3.71288100 | 0.36510300  |
| H | 4.66696800  | -4.12330800 | 1.73810300  |
| H | 4.88012500  | -0.22438000 | -1.39092500 |
| C | 2.00241900  | -3.46172500 | 2.53681300  |
| H | 2.72263000  | -3.61823000 | 3.34666000  |
| H | 1.04088200  | -3.16865800 | 2.95885200  |
| H | 1.87888800  | -4.38851300 | 1.96829500  |

|   |            |            |             |
|---|------------|------------|-------------|
| N | 2.05846600 | 0.70476600 | 0.05316800  |
| C | 2.59870200 | 1.45044100 | -0.96390800 |
| O | 3.02114800 | 1.03748000 | -2.04265800 |
| O | 2.52370000 | 2.76912200 | -0.63453300 |
| C | 3.03403900 | 3.81634300 | -1.52979800 |
| C | 2.78367100 | 5.09562300 | -0.72584800 |
| H | 3.12905700 | 5.97006800 | -1.28774300 |
| H | 1.71561200 | 5.22329900 | -0.51715400 |
| H | 3.32000100 | 5.06627000 | 0.22895000  |
| C | 2.23446900 | 3.83868500 | -2.83634500 |
| H | 2.39437900 | 2.92551400 | -3.41191600 |
| H | 1.16341000 | 3.94015700 | -2.62592800 |
| H | 2.54064600 | 4.69731900 | -3.44528700 |
| C | 4.53538600 | 3.62769000 | -1.77382000 |
| H | 4.93436200 | 4.49586800 | -2.31101900 |
| H | 5.07005300 | 3.54436000 | -0.82061900 |
| H | 4.73237700 | 2.73277600 | -2.36618700 |

**b-Boc-O-anti-R**

|   |             |             |             |
|---|-------------|-------------|-------------|
| C | -2.32384300 | 0.93429700  | -0.60701900 |
| C | -3.46243300 | -0.03198600 | -0.92652700 |
| C | -3.32343300 | -1.42878300 | -0.63132100 |
| C | -4.66008000 | 0.41913300  | -1.45354000 |
| C | -2.15969900 | -1.99591000 | -0.05591600 |
| C | -4.45311300 | -2.27656200 | -0.89962000 |
| C | -5.70820700 | -0.49966800 | -1.70886500 |
| H | -4.79989600 | 1.47249100  | -1.66548900 |
| C | -2.12692300 | -3.33724300 | 0.30329000  |
| H | -1.27126300 | -1.40730600 | 0.12335400  |
| C | -4.36664800 | -3.65963100 | -0.57385700 |
| H | -6.64426200 | -0.15162700 | -2.13485900 |
| C | -3.24034100 | -4.17984800 | 0.02135000  |
| H | -5.23029300 | -4.27574000 | -0.79590900 |
| H | -3.17034300 | -5.22520900 | 0.29789500  |
| C | -2.21141000 | 1.12532700  | 0.91682500  |
| H | -2.06610800 | 0.12890400  | 1.33869500  |
| C | -3.42006000 | 1.80712800  | 1.59990000  |
| C | -0.64329400 | 1.49004600  | 2.78584900  |
| C | -1.13389300 | 3.40577200  | 1.25935800  |
| C | -2.91347400 | 2.59751700  | 2.83269200  |
| H | -3.92115500 | 2.48286600  | 0.89926200  |
| H | -4.14234100 | 1.03956700  | 1.89297900  |
| C | -1.91879300 | 1.72227200  | 3.63741200  |
| H | -0.33087300 | 0.44326200  | 2.75684400  |

|   |             |             |             |
|---|-------------|-------------|-------------|
| H | 0.19830800  | 2.10814100  | 3.10756900  |
| C | -2.16362700 | 3.85100700  | 2.32466000  |
| H | -1.46932300 | 3.60802600  | 0.24391400  |
| H | -0.14672200 | 3.84383800  | 1.40858600  |
| H | -3.75587900 | 2.88951900  | 3.46701400  |
| H | -1.65196900 | 2.21806200  | 4.57672300  |
| H | -2.86741700 | 4.56213600  | 1.87947000  |
| H | -1.67071500 | 4.36089500  | 3.16077600  |
| O | -1.05613800 | -3.90192400 | 0.93526100  |
| N | -5.62134800 | -1.80113100 | -1.44370300 |
| N | -0.94770500 | 1.89215800  | 1.34331100  |
| H | -0.39995800 | -3.21386100 | 1.24354900  |
| H | -1.37422300 | 0.51416400  | -0.97291200 |
| O | -2.51074300 | 2.24293300  | -1.21723700 |
| C | -2.19436000 | 2.29293200  | -2.64438100 |
| H | -2.84684200 | 1.62693400  | -3.21743400 |
| H | -2.36084600 | 3.32646400  | -2.94851200 |
| H | -1.14616100 | 2.02110900  | -2.81559700 |
| C | 2.40016000  | -0.61993500 | 1.89724100  |
| H | 1.87597500  | 0.31796800  | 1.80841300  |
| H | -0.11269900 | 1.65472100  | 0.75123900  |
| H | 3.31083800  | -0.67561400 | 2.47579100  |
| N | 1.58458600  | -1.72516600 | 1.99892900  |
| O | 2.06007400  | -2.87915800 | 2.28770400  |
| O | 0.30797900  | -1.59555900 | 1.67152000  |
| H | -2.38399900 | 0.76555300  | 3.89928200  |
| C | 0.72937900  | -2.35370400 | -2.27525300 |
| C | 1.30506600  | -3.62521900 | -2.14748500 |
| C | 2.46392500  | -3.82957400 | -1.38222700 |
| C | 3.01942200  | -2.72590400 | -0.74142900 |
| C | 2.43019900  | -1.44360800 | -0.83441200 |
| C | 1.29079800  | -1.25240900 | -1.61020000 |
| N | 4.20511200  | -2.65288400 | 0.01446900  |
| C | 4.46406000  | -1.35036100 | 0.42571500  |
| C | 3.26435000  | -0.50735000 | -0.04123000 |
| O | 5.45080700  | -0.98070900 | 1.07893300  |
| H | -0.16289000 | -2.22554100 | -2.87770100 |
| H | 0.84916600  | -4.47146800 | -2.65056500 |
| H | 2.90608900  | -4.81507800 | -1.29741800 |
| H | 0.85083500  | -0.26493100 | -1.69466900 |
| C | 5.01741400  | -3.79023700 | 0.41595100  |
| H | 5.37587200  | -4.34331400 | -0.45897900 |
| H | 5.87337100  | -3.40002800 | 0.96903000  |
| H | 4.44083800  | -4.45949900 | 1.06322300  |

|   |            |            |             |
|---|------------|------------|-------------|
| N | 3.45979500 | 0.79113900 | -0.28252200 |
| C | 2.57700200 | 1.76187200 | -0.49122500 |
| O | 1.38495000 | 1.86613800 | -0.00694100 |
| O | 3.12094100 | 2.76186400 | -1.27372700 |
| C | 2.54319100 | 4.13251700 | -1.42990800 |
| C | 3.57736200 | 4.80651800 | -2.34040400 |
| H | 3.28834000 | 5.84507200 | -2.53778700 |
| H | 4.56282700 | 4.79561100 | -1.86679500 |
| H | 3.64940100 | 4.27275600 | -3.29249500 |
| C | 2.49189100 | 4.81579700 | -0.05683600 |
| H | 1.83662500 | 4.26820800 | 0.62336500  |
| H | 3.49425700 | 4.85316000 | 0.38096900  |
| H | 2.12032500 | 5.84192400 | -0.15993200 |
| C | 1.17354800 | 4.06072100 | -2.11921600 |
| H | 0.81423300 | 5.07334000 | -2.33816600 |
| H | 1.26353600 | 3.51816700 | -3.06657600 |
| H | 0.44450300 | 3.54933100 | -1.48985400 |

**b-Boc-O-gau1-S**

|   |            |             |             |
|---|------------|-------------|-------------|
| C | 2.68030400 | 0.82304200  | 0.70444000  |
| C | 3.89368100 | -0.05004400 | 0.36475400  |
| C | 3.78406800 | -1.22407300 | -0.45019800 |
| C | 5.14235800 | 0.29824200  | 0.83872800  |
| C | 2.56425500 | -1.69779700 | -0.99578000 |
| C | 4.99665200 | -1.94410400 | -0.72426100 |
| C | 6.26923300 | -0.49058800 | 0.51240600  |
| H | 5.26199400 | 1.17326000  | 1.46817200  |
| C | 2.53669000 | -2.82280700 | -1.80712400 |
| H | 1.62975400 | -1.18340000 | -0.81084100 |
| C | 4.93016400 | -3.10571700 | -1.54275000 |
| H | 7.25004800 | -0.20688500 | 0.89272200  |
| C | 3.74014600 | -3.53586100 | -2.07262700 |
| H | 5.85708400 | -3.63776900 | -1.73565100 |
| H | 3.68791000 | -4.41793900 | -2.70400900 |
| C | 2.31048200 | 1.71735400  | -0.50009200 |
| H | 2.17109200 | 1.05174200  | -1.35331400 |
| C | 3.33544700 | 2.82598700  | -0.83929200 |
| C | 0.46239500 | 2.82325000  | -1.70423600 |
| C | 0.98410600 | 3.59321700  | 0.57559900  |
| C | 2.58597900 | 4.09548400  | -1.29150600 |
| H | 3.94975500 | 3.05234900  | 0.03704800  |
| H | 4.00280400 | 2.46557600  | -1.62755800 |
| C | 1.54339900 | 3.71216900  | -2.36014700 |
| H | 0.24899300 | 1.91122500  | -2.26024800 |

|   |             |             |             |
|---|-------------|-------------|-------------|
| H | -0.47509000 | 3.35803300  | -1.53527900 |
| C | 1.85183600  | 4.69316400  | -0.07555400 |
| H | 1.38715200  | 3.24715100  | 1.52373800  |
| H | -0.05469800 | 3.89484700  | 0.71822100  |
| H | 3.29476300  | 4.82292500  | -1.69857900 |
| H | 1.07704400  | 4.60819400  | -2.78239100 |
| H | 2.57337800  | 5.07198100  | 0.65539000  |
| H | 1.23049200  | 5.53913100  | -0.38982300 |
| O | 1.41624700  | -3.30326100 | -2.38015400 |
| N | 6.21600200  | -1.57099000 | -0.24162300 |
| N | 0.94683500  | 2.38980800  | -0.33964300 |
| H | 0.63311900  | -2.71318300 | -2.23753100 |
| H | 1.81973300  | 0.17631800  | 0.92719000  |
| O | 2.93863600  | 1.66258700  | 1.82234900  |
| C | 2.73168000  | 1.02526300  | 3.08286900  |
| H | 3.36550900  | 0.13625600  | 3.19442400  |
| H | 3.00815600  | 1.75541100  | 3.84830700  |
| H | 1.67897100  | 0.74485500  | 3.20697400  |
| C | -2.34505700 | -0.13288700 | -2.03057000 |
| H | -2.27330000 | 0.93757700  | -1.91481700 |
| H | 0.24705400  | 1.72416300  | 0.05945600  |
| H | -3.04158300 | -0.55309700 | -2.74364000 |
| N | -1.14009300 | -0.78239200 | -1.96325400 |
| O | -1.01630200 | -1.94978400 | -2.42788900 |
| O | -0.18974800 | -0.22628900 | -1.34007300 |
| H | 2.02805300  | 3.17887900  | -3.18518300 |
| C | -5.16170400 | 2.77045700  | 0.32635300  |
| C | -6.33847300 | 2.28203900  | -0.24798500 |
| C | -6.43363000 | 0.95659600  | -0.69083800 |
| C | -5.31735200 | 0.13959500  | -0.54033700 |
| C | -4.11487000 | 0.62053600  | 0.02937300  |
| C | -4.04102800 | 1.94169300  | 0.46608100  |
| N | -5.19677400 | -1.20969200 | -0.88328500 |
| C | -3.95254100 | -1.70610200 | -0.51507700 |
| C | -3.15560000 | -0.51563800 | 0.03778100  |
| O | -3.60098100 | -2.86799300 | -0.59228900 |
| H | -5.11357300 | 3.80118200  | 0.66599600  |
| H | -7.19920300 | 2.93716300  | -0.35355500 |
| H | -7.35221000 | 0.57938100  | -1.12903500 |
| H | -3.12114500 | 2.31171800  | 0.90314900  |
| C | -6.24604900 | -2.02612100 | -1.45668100 |
| H | -7.12938500 | -2.04345700 | -0.80755500 |
| H | -6.53851900 | -1.65316400 | -2.44519400 |
| H | -5.85448000 | -3.04003400 | -1.55571000 |

|   |             |             |            |
|---|-------------|-------------|------------|
| N | -2.16027400 | -0.82790900 | 0.84653900 |
| C | -1.34302900 | 0.05858900  | 1.45816000 |
| O | -1.09534700 | 1.23384500  | 1.13027000 |
| O | -0.65363100 | -0.40823800 | 2.52909500 |
| C | -0.84847600 | -1.72958000 | 3.17043600 |
| C | -0.45007000 | -2.86627200 | 2.22465600 |
| H | -0.45143200 | -3.81292800 | 2.77810000 |
| H | -1.13823500 | -2.94870700 | 1.38286100 |
| H | 0.56286400  | -2.70665300 | 1.83777400 |
| C | -2.28648500 | -1.86677400 | 3.67930900 |
| H | -2.55588700 | -1.01054000 | 4.30863100 |
| H | -2.99810400 | -1.93774400 | 2.85504100 |
| H | -2.37325400 | -2.77434600 | 4.28765900 |
| C | 0.11961600  | -1.66273500 | 4.35585900 |
| H | 0.04732900  | -2.58065000 | 4.94885700 |
| H | 1.15416900  | -1.56156200 | 4.01190000 |
| H | -0.11675300 | -0.81341600 | 5.00619000 |

**b-Boc-O-gau2-S**

|   |            |             |             |
|---|------------|-------------|-------------|
| C | 2.98673600 | 0.68153800  | 0.80525900  |
| C | 3.99909700 | -0.26133400 | 0.15110500  |
| C | 3.58080300 | -1.28888700 | -0.75427100 |
| C | 5.34588800 | -0.14208900 | 0.42387700  |
| C | 2.23365700 | -1.50033100 | -1.13789200 |
| C | 4.60240200 | -2.13469900 | -1.30312200 |
| C | 6.26867800 | -1.03024700 | -0.17666800 |
| H | 5.69923900 | 0.62268900  | 1.10693100  |
| C | 1.89839500 | -2.48900400 | -2.05254400 |
| H | 1.43823800 | -0.88189300 | -0.74210100 |
| C | 4.22116600 | -3.16602100 | -2.20598600 |
| H | 7.33027300 | -0.93149600 | 0.04744400  |
| C | 2.91104300 | -3.34161300 | -2.57538400 |
| H | 5.00745300 | -3.80134100 | -2.60291700 |
| H | 2.62058200 | -4.11827300 | -3.27663200 |
| C | 2.48652400 | 1.73304500  | -0.21011600 |
| H | 2.18761400 | 1.19148000  | -1.10878600 |
| C | 3.49375800 | 2.84940700  | -0.57116600 |
| C | 0.50702400 | 3.01255500  | -0.95914500 |
| C | 1.43958000 | 3.48719100  | 1.27378300  |
| C | 2.72416300 | 4.17144700  | -0.77242400 |
| H | 4.23370200 | 2.96572100  | 0.22644200  |
| H | 4.02878600 | 2.56694600  | -1.48272800 |
| C | 1.51898900 | 3.91402700  | -1.69953100 |
| H | 0.10627000 | 2.19333700  | -1.55870500 |

|   |             |             |             |
|---|-------------|-------------|-------------|
| H | -0.33915500 | 3.57863200  | -0.56406100 |
| C | 2.20318100  | 4.64921000  | 0.59834200  |
| H | 2.00802900  | 3.02997700  | 2.08122300  |
| H | 0.45718100  | 3.78298000  | 1.64752300  |
| H | 3.38590400  | 4.92630100  | -1.20759700 |
| H | 1.03609500  | 4.85660900  | -1.97665700 |
| H | 3.03522300  | 4.96025400  | 1.23805000  |
| H | 1.54841000  | 5.51800200  | 0.46932300  |
| O | 0.63750300  | -2.69092100 | -2.48103900 |
| N | 5.92612300  | -1.99614100 | -1.00657100 |
| N | 1.19632500  | 2.40732900  | 0.24699300  |
| H | 0.06829600  | -1.92640200 | -2.19581700 |
| H | 2.11886000  | 0.09161000  | 1.13601500  |
| O | 3.54030900  | 1.36028300  | 1.92690200  |
| C | 3.52359500  | 0.59560500  | 3.12996900  |
| H | 4.08473500  | -0.34161500 | 3.02694500  |
| H | 3.99978100  | 1.21155700  | 3.89742700  |
| H | 2.49472000  | 0.36626500  | 3.43794100  |
| C | -2.77242800 | -0.75124400 | -2.12529200 |
| H | -3.66426800 | -0.38192000 | -2.61160700 |
| H | 0.53435900  | 1.70184600  | 0.64961600  |
| H | -2.53924800 | -1.80583500 | -2.10868300 |
| N | -1.70784100 | 0.09378100  | -2.15772600 |
| O | -0.54700800 | -0.35043400 | -1.82662700 |
| O | -1.86211900 | 1.31024500  | -2.43189400 |
| H | 1.85299100  | 3.43579700  | -2.62691200 |
| C | -4.56605900 | 3.00748200  | 0.28016200  |
| C | -5.87988500 | 2.70122800  | -0.07987600 |
| C | -6.27566600 | 1.37850400  | -0.32082300 |
| C | -5.31846600 | 0.38047300  | -0.18595200 |
| C | -3.97798800 | 0.66988100  | 0.17601800  |
| C | -3.60626300 | 1.99550700  | 0.40347800  |
| N | -5.49602000 | -0.99285500 | -0.37121400 |
| C | -4.31899800 | -1.67937900 | -0.12541000 |
| C | -3.25867000 | -0.62003400 | 0.22018100  |
| O | -4.18445500 | -2.89067200 | -0.14866300 |
| H | -4.28235300 | 4.04063900  | 0.45955300  |
| H | -6.61344200 | 3.49741400  | -0.17644800 |
| H | -7.29827000 | 1.14479300  | -0.59924400 |
| H | -2.58419900 | 2.21934000  | 0.67418100  |
| C | -6.74179900 | -1.63907000 | -0.72881400 |
| H | -7.51704400 | -1.43548600 | 0.01884000  |
| H | -7.09392900 | -1.29751600 | -1.70903300 |
| H | -6.55441400 | -2.71343800 | -0.76763400 |

|   |             |             |            |
|---|-------------|-------------|------------|
| N | -2.19365300 | -1.07738900 | 0.84075600 |
| C | -1.17074800 | -0.32190200 | 1.31925500 |
| O | -0.92142700 | 0.87340900  | 1.08939700 |
| O | -0.29321800 | -0.95826500 | 2.12775700 |
| C | -0.43504500 | -2.33934000 | 2.65164800 |
| C | -1.71320800 | -2.45780200 | 3.48610600 |
| H | -1.72445700 | -3.42599800 | 3.99972300 |
| H | -1.74928600 | -1.67085000 | 4.24852200 |
| H | -2.60576900 | -2.38929000 | 2.86225100 |
| C | 0.79460800  | -2.46662400 | 3.55575100 |
| H | 1.71916300  | -2.36536500 | 2.97755700 |
| H | 0.78422700  | -1.69989200 | 4.33810000 |
| H | 0.80221300  | -3.44916800 | 4.03938200 |
| C | -0.37208800 | -3.36978800 | 1.52175500 |
| H | -0.30412100 | -4.37468500 | 1.95516000 |
| H | -1.25559900 | -3.32079100 | 0.88462900 |
| H | 0.52013700  | -3.20932900 | 0.90682000 |

**b-Boc-O-anti-S**

|   |             |             |             |
|---|-------------|-------------|-------------|
| C | -2.34956600 | 1.12503900  | -0.55221700 |
| C | -3.70586800 | 0.47231600  | -0.83315800 |
| C | -3.90654800 | -0.93592600 | -0.66327600 |
| C | -4.78011700 | 1.24253700  | -1.22814200 |
| C | -2.89123100 | -1.83481300 | -0.25477400 |
| C | -5.22898600 | -1.44058900 | -0.90200700 |
| C | -6.03644600 | 0.63458300  | -1.45748900 |
| H | -4.66516700 | 2.31225000  | -1.36640100 |
| C | -3.16361400 | -3.18112500 | -0.05306500 |
| H | -1.87724200 | -1.49606300 | -0.08350700 |
| C | -5.47306600 | -2.82899400 | -0.70726700 |
| H | -6.87787100 | 1.24809100  | -1.77739200 |
| C | -4.47816200 | -3.67635200 | -0.28896400 |
| H | -6.47914000 | -3.19232500 | -0.89518300 |
| H | -4.66584100 | -4.73464100 | -0.13349400 |
| C | -2.08582600 | 1.14997400  | 0.96605800  |
| H | -2.05632800 | 0.10718600  | 1.28270000  |
| C | -3.09954800 | 1.91371000  | 1.84266300  |
| C | -0.30394800 | 1.07288700  | 2.65377100  |
| C | -0.65926000 | 3.19449800  | 1.43502000  |
| C | -2.36610600 | 2.44261800  | 3.09488700  |
| H | -3.54363300 | 2.74652200  | 1.28713200  |
| H | -3.90892700 | 1.23136800  | 2.11604900  |
| C | -1.45060100 | 1.33459900  | 3.65900100  |
| H | -0.11235800 | 0.01298800  | 2.47576000  |



|   |             |             |             |
|---|-------------|-------------|-------------|
| H | 0.63129500  | 1.55190000  | 2.94940200  |
| C | -1.48428500 | 3.62898400  | 2.66300200  |
| H | -1.06329300 | 3.57327400  | 0.49922200  |
| H | 0.39321800  | 3.46817700  | 1.50679600  |
| H | -3.08847000 | 2.75937700  | 3.85250200  |
| H | -1.02645400 | 1.63915600  | 4.62071600  |
| H | -2.10167900 | 4.49306600  | 2.39741700  |
| H | -0.82869100 | 3.93495900  | 3.48561100  |
| O | -2.24150700 | -4.06652600 | 0.36461100  |
| N | -6.26891600 | -0.65388000 | -1.29915900 |
| N | -0.69507000 | 1.68211500  | 1.32331000  |
| H | -1.35751600 | -3.61985100 | 0.47139700  |
| H | -1.55920800 | 0.51401700  | -1.01489600 |
| O | -2.26489200 | 2.44913000  | -1.05755500 |
| C | -1.92257500 | 2.51445800  | -2.44218100 |
| H | -2.67190700 | 2.01712400  | -3.07019600 |
| H | -1.88419700 | 3.57463900  | -2.70390900 |
| H | -0.94053300 | 2.05881000  | -2.62782300 |
| C | 0.99821800  | -1.50379300 | -1.21885200 |
| H | 1.18419700  | -1.62261500 | -2.27640400 |
| H | 0.01616900  | 1.41349400  | 0.61874700  |
| H | 0.59748100  | -0.58146400 | -0.82833900 |
| N | 0.56587500  | -2.63661500 | -0.58453900 |
| O | 0.01411000  | -2.52068000 | 0.57487900  |
| O | 0.74443900  | -3.76798100 | -1.08846600 |
| H | -2.02447900 | 0.41822500  | 3.83207100  |
| C | 3.25725800  | -1.01579600 | 3.08386400  |
| C | 3.62540300  | -2.36259500 | 3.15873200  |
| C | 3.81098400  | -3.13106900 | 2.00307600  |
| C | 3.60797000  | -2.51353600 | 0.77261300  |
| C | 3.20415200  | -1.16135200 | 0.67973600  |
| C | 3.04379700  | -0.40843400 | 1.84007300  |
| N | 3.79532200  | -3.05694200 | -0.49973800 |
| C | 3.58623700  | -2.10396400 | -1.48405300 |
| C | 3.11244000  | -0.83601200 | -0.75985100 |
| O | 3.75500500  | -2.26233600 | -2.67937700 |
| H | 3.13633800  | -0.43747100 | 3.99563300  |
| H | 3.78039200  | -2.82496200 | 4.12999200  |
| H | 4.11233300  | -4.17147100 | 2.06771000  |
| H | 2.75769200  | 0.63515900  | 1.77461300  |
| C | 4.13166500  | -4.43744500 | -0.78118900 |
| H | 5.09307700  | -4.70681100 | -0.32917700 |
| H | 3.35086200  | -5.10695800 | -0.40618000 |
| H | 4.20281600  | -4.54152700 | -1.86488600 |

|   |            |            |             |
|---|------------|------------|-------------|
| N | 3.20451300 | 0.30952100 | -1.40146900 |
| C | 2.70061100 | 1.48126200 | -0.95078400 |
| O | 1.69239100 | 1.65810700 | -0.23692600 |
| O | 3.41211300 | 2.50074300 | -1.48231600 |
| C | 3.08620100 | 3.91609500 | -1.28433100 |
| C | 4.16030900 | 4.62051100 | -2.11903700 |
| H | 4.04092200 | 5.70740100 | -2.05377800 |
| H | 5.16156100 | 4.35960200 | -1.76062600 |
| H | 4.08742300 | 4.32671100 | -3.17138100 |
| C | 3.23401800 | 4.29149200 | 0.19331800  |
| H | 2.50168300 | 3.77067900 | 0.81300600  |
| H | 4.23662700 | 4.03459600 | 0.55275900  |
| H | 3.09428300 | 5.37097600 | 0.32090800  |
| C | 1.69326300 | 4.23103600 | -1.84060700 |
| H | 1.51861800 | 5.31288200 | -1.81060300 |
| H | 1.62066700 | 3.90679900 | -2.88481500 |
| H | 0.90930800 | 3.73486700 | -1.26620700 |

### 3.3 *MODE c*

#### TS2-c-gau1-OS-R

|   |            |             |             |
|---|------------|-------------|-------------|
| C | 3.15110100 | 0.37702800  | 1.21857600  |
| C | 4.40589500 | -0.34982700 | 0.73059500  |
| C | 4.31748800 | -1.40232200 | -0.23570400 |
| C | 5.65286600 | -0.00314200 | 1.20718200  |
| C | 3.09773700 | -1.85530300 | -0.79282100 |
| C | 5.54548900 | -2.02176000 | -0.64511000 |
| C | 6.80023400 | -0.68272600 | 0.73415600  |
| H | 5.75767000 | 0.77761500  | 1.95316200  |
| C | 3.07501600 | -2.89171400 | -1.71274300 |
| H | 2.15684400 | -1.38652800 | -0.53264300 |
| C | 5.48994600 | -3.07454000 | -1.60073300 |
| H | 7.78226700 | -0.40433900 | 1.11486600  |
| C | 4.29400000 | -3.50200200 | -2.12248300 |
| H | 6.42901500 | -3.53073100 | -1.89993200 |
| H | 4.25042000 | -4.30975400 | -2.84709200 |
| C | 2.74897500 | 1.47346800  | 0.20405200  |
| H | 2.81285200 | 1.02150700  | -0.78780200 |
| C | 3.59361000 | 2.77013500  | 0.26692300  |
| C | 0.86393100 | 2.59981300  | -0.93866500 |
| C | 1.00055000 | 2.74715200  | 1.52416500  |
| C | 2.66922200 | 3.99269300  | 0.10496500  |
| H | 4.11847100 | 2.82983800  | 1.22405000  |

|   |             |             |             |
|---|-------------|-------------|-------------|
| H | 4.34662000  | 2.74750700  | -0.52633700 |
| C | 1.80351200  | 3.80676700  | -1.15534600 |
| H | 0.90442400  | 1.86934800  | -1.74841100 |
| H | -0.17546600 | 2.89368600  | -0.78918300 |
| C | 1.74707300  | 4.08864200  | 1.33735700  |
| H | 1.35044300  | 2.19789600  | 2.39632000  |
| H | -0.08474500 | 2.84686800  | 1.56817200  |
| H | 3.27226500  | 4.90161400  | 0.01710600  |
| H | 1.20872400  | 4.70536500  | -1.34816900 |
| H | 2.33642700  | 4.30934100  | 2.23306800  |
| H | 1.03116300  | 4.90734900  | 1.20651100  |
| O | 1.93434300  | -3.35549400 | -2.25901900 |
| N | 6.76453400  | -1.65440700 | -0.15715600 |
| N | 1.27926300  | 1.87122100  | 0.32279000  |
| H | 1.15195400  | -2.95397200 | -1.80169500 |
| H | 2.32668900  | -0.34756400 | 1.28015000  |
| O | 3.33270500  | 0.97595700  | 2.49423100  |
| C | 3.26423100  | 0.05145200  | 3.57665000  |
| H | 4.05042600  | -0.71125300 | 3.51399200  |
| H | 3.40195400  | 0.63263800  | 4.49195800  |
| H | 2.28573200  | -0.44882800 | 3.61176300  |
| C | -1.39510800 | -1.50156400 | 0.86884300  |
| H | -1.69089400 | -2.45767900 | 1.27756300  |
| H | 0.69754800  | 1.00912900  | 0.35860600  |
| H | -1.30962600 | -0.62465900 | 1.49335800  |
| N | -0.46303700 | -1.58290400 | -0.12401000 |
| O | 0.13583600  | -0.52452100 | -0.51320500 |
| O | -0.24992600 | -2.68569600 | -0.70492600 |
| H | 2.44203100  | 3.64420600  | -2.03019100 |
| C | -5.19277200 | -0.60190900 | 3.25257700  |
| C | -5.78449200 | -1.86001700 | 3.10883800  |
| C | -5.52572000 | -2.66199100 | 1.98943900  |
| C | -4.65960600 | -2.16391500 | 1.02111900  |
| C | -4.04918300 | -0.89618000 | 1.15530700  |
| C | -4.31613400 | -0.11328400 | 2.27526200  |
| N | -4.27099900 | -2.77224900 | -0.17736600 |
| C | -3.45244400 | -1.93191600 | -0.91987000 |
| C | -3.21486200 | -0.68479800 | -0.05837600 |
| O | -3.03237100 | -2.15187700 | -2.04014600 |
| H | -5.40910900 | 0.00008800  | 4.13042800  |
| H | -6.45954600 | -2.22857600 | 3.87673100  |
| H | -5.99262900 | -3.63586900 | 1.88138600  |
| H | -3.83730600 | 0.85268600  | 2.38850900  |
| C | -4.71851600 | -4.06732500 | -0.64627500 |

|   |             |             |             |
|---|-------------|-------------|-------------|
| H | -5.80729100 | -4.08532800 | -0.77453800 |
| H | -4.24099000 | -4.24865700 | -1.61065800 |
| H | -4.42891800 | -4.85822900 | 0.05475000  |
| N | -2.91181800 | 0.42770500  | -0.70452400 |
| C | -2.53114700 | 1.56060800  | -0.06532800 |
| O | -1.96584700 | 1.63686600  | 1.03497600  |
| O | -2.66804600 | 2.73198000  | -0.74492300 |
| C | -3.41427200 | 2.91795100  | -2.00413700 |
| C | -2.70779300 | 2.21301400  | -3.16591600 |
| H | -3.23515000 | 2.42982600  | -4.10244500 |
| H | -1.67920300 | 2.57787000  | -3.26997500 |
| H | -2.68400700 | 1.13241700  | -3.01777900 |
| C | -3.36037300 | 4.43816500  | -2.18742600 |
| H | -3.84403200 | 4.94988300  | -1.34832900 |
| H | -2.32328400 | 4.78610300  | -2.24901800 |
| H | -3.87376300 | 4.72795100  | -3.11057100 |
| C | -4.86690000 | 2.45902300  | -1.84277500 |
| H | -5.45048700 | 2.77144700  | -2.71644400 |
| H | -4.93804700 | 1.37327800  | -1.75508600 |
| H | -5.31793200 | 2.91517200  | -0.95397800 |

**TS2-c-gau2-OS-R**

|   |            |             |             |
|---|------------|-------------|-------------|
| C | 3.35574500 | -0.18965200 | 1.30220200  |
| C | 4.49628000 | -0.67648600 | 0.40933300  |
| C | 4.21696500 | -1.18256000 | -0.89983100 |
| C | 5.81035700 | -0.62694200 | 0.82092300  |
| C | 2.91042800 | -1.27600600 | -1.43612400 |
| C | 5.32976900 | -1.59396700 | -1.70279700 |
| C | 6.83456600 | -1.07318700 | -0.04956800 |
| H | 6.06422400 | -0.25377100 | 1.80769300  |
| C | 2.69714500 | -1.73711000 | -2.72326500 |
| H | 2.04838900 | -0.97485600 | -0.85718400 |
| C | 5.07686200 | -2.08046600 | -3.01624100 |
| H | 7.87134600 | -1.03585000 | 0.28258600  |
| C | 3.80060200 | -2.14889100 | -3.52021100 |
| H | 5.93083800 | -2.39021700 | -3.61121000 |
| H | 3.60909800 | -2.51193700 | -4.52546400 |
| C | 2.84818700 | 1.18733500  | 0.80460600  |
| H | 2.84158200 | 1.14944400  | -0.28533300 |
| C | 3.65125600 | 2.41972700  | 1.28623100  |
| C | 0.83210900 | 2.51443200  | 0.27628800  |
| C | 1.18736500 | 1.77350300  | 2.60928200  |
| C | 2.66935600 | 3.55659500  | 1.63911000  |

|   |             |             |             |
|---|-------------|-------------|-------------|
| H | 4.24954800  | 2.16105700  | 2.16386500  |
| H | 4.33833200  | 2.73109500  | 0.49353600  |
| C | 1.69807600  | 3.78136600  | 0.46327600  |
| H | 0.84315100  | 2.12716900  | -0.74330600 |
| H | -0.21132400 | 2.64548700  | 0.56466400  |
| C | 1.85930000  | 3.13908600  | 2.88215200  |
| H | 1.63038100  | 0.96891800  | 3.19412400  |
| H | 0.10943700  | 1.78634800  | 2.78095900  |
| H | 3.22664500  | 4.47482900  | 1.84762000  |
| H | 1.05394900  | 4.64425000  | 0.66089000  |
| H | 2.51654600  | 3.05817500  | 3.75363500  |
| H | 1.10351300  | 3.89814600  | 3.10970700  |
| O | 1.46489200  | -1.81830600 | -3.27448000 |
| N | 6.62068800  | -1.53739200 | -1.26545700 |
| N | 1.38204200  | 1.41529000  | 1.15658800  |
| H | 0.80034600  | -1.44743900 | -2.65050700 |
| H | 2.52550200  | -0.90637600 | 1.21967400  |
| O | 3.72798300  | -0.07958800 | 2.66802100  |
| C | 3.72295000  | -1.32244700 | 3.36757400  |
| H | 4.44737100  | -2.03185900 | 2.94834400  |
| H | 3.99930600  | -1.09771200 | 4.40090400  |
| H | 2.72499500  | -1.78298200 | 3.35246500  |
| C | -1.59236100 | -2.10485700 | -0.42337700 |
| H | -1.66712500 | -2.48625100 | -1.43408700 |
| H | 0.83197000  | 0.54406900  | 0.95336600  |
| H | -1.62561300 | -2.81604100 | 0.39336600  |
| N | -0.57728800 | -1.18343600 | -0.28441500 |
| O | -0.11317600 | -0.93044600 | 0.87336300  |
| O | -0.18522900 | -0.53533200 | -1.29817300 |
| H | 2.25968600  | 3.99768800  | -0.45164700 |
| C | -3.55843200 | -0.17328100 | 3.41889700  |
| C | -4.35899800 | -1.24764800 | 3.80810200  |
| C | -4.77344800 | -2.20964900 | 2.87771600  |
| C | -4.36050900 | -2.05596300 | 1.55844700  |
| C | -3.55080500 | -0.97622700 | 1.14318300  |
| C | -3.14642800 | -0.03448800 | 2.08520700  |
| N | -4.66252500 | -2.89499600 | 0.47753100  |
| C | -4.10086600 | -2.42894200 | -0.69453900 |
| C | -3.31145500 | -1.13521800 | -0.33916500 |
| O | -4.20387400 | -2.95552000 | -1.78705000 |
| H | -3.24913300 | 0.56418400  | 4.15468600  |
| H | -4.67084200 | -1.34426500 | 4.84493600  |
| H | -5.40013400 | -3.04308100 | 3.17919900  |
| H | -2.53177800 | 0.79619300  | 1.76820500  |

|   |             |             |             |
|---|-------------|-------------|-------------|
| C | -5.49584300 | -4.07828800 | 0.54662000  |
| H | -6.50514000 | -3.82476500 | 0.89085900  |
| H | -5.55384800 | -4.49754700 | -0.45904700 |
| H | -5.06451900 | -4.82258600 | 1.22593000  |
| N | -3.38688800 | -0.21505300 | -1.31272900 |
| C | -3.03147000 | 1.08561300  | -1.12934300 |
| O | -2.33532800 | 1.59878900  | -0.24482700 |
| O | -3.56899600 | 1.80977200  | -2.15568500 |
| C | -3.42864200 | 3.25796900  | -2.25486900 |
| C | -4.24093200 | 3.58694300  | -3.51265300 |
| H | -4.22543500 | 4.66512500  | -3.70767900 |
| H | -3.82746500 | 3.07100400  | -4.38598800 |
| H | -5.28310400 | 3.27164500  | -3.39359500 |
| C | -1.96015600 | 3.64723000  | -2.46170800 |
| H | -1.36847700 | 3.43832400  | -1.56916100 |
| H | -1.53443500 | 3.08881800  | -3.30333100 |
| H | -1.88481700 | 4.71691000  | -2.69137500 |
| C | -4.04312900 | 3.94962300  | -1.03160700 |
| H | -4.04120200 | 5.03650100  | -1.17669500 |
| H | -5.08224100 | 3.62838600  | -0.89511800 |
| H | -3.48495200 | 3.71506300  | -0.12355800 |

**TS2-c-anti-OS-R**

|   |             |             |             |
|---|-------------|-------------|-------------|
| C | -3.88263900 | 0.11834200  | 1.01834400  |
| C | -4.50390000 | 1.44374700  | 0.57781800  |
| C | -3.70409600 | 2.42495900  | -0.08923100 |
| C | -5.83522600 | 1.72630900  | 0.79313200  |
| C | -2.33295500 | 2.24003800  | -0.38265800 |
| C | -4.34320900 | 3.64369900  | -0.48621900 |
| C | -6.36586500 | 2.96689400  | 0.36227800  |
| H | -6.47590600 | 1.00973900  | 1.29653400  |
| C | -1.60815600 | 3.20666900  | -1.05730100 |
| H | -1.82126200 | 1.32919200  | -0.10554300 |
| C | -3.56667100 | 4.62917700  | -1.15854300 |
| H | -7.41784400 | 3.18766900  | 0.53890100  |
| C | -2.23789800 | 4.42278100  | -1.44160800 |
| H | -4.06399200 | 5.55045100  | -1.44692200 |
| H | -1.64913000 | 5.17224400  | -1.96188700 |
| C | -3.68750200 | -0.80874600 | -0.20857800 |
| H | -3.34250700 | -0.18234600 | -1.03223200 |
| C | -4.93525700 | -1.61802000 | -0.63943900 |
| C | -2.11800300 | -2.33592500 | -1.35109400 |
| C | -2.91091900 | -2.92765000 | 0.91339200  |
| C | -4.50422000 | -3.04624000 | -1.02837900 |

|   |             |             |             |
|---|-------------|-------------|-------------|
| H | -5.65776500 | -1.65920100 | 0.17961900  |
| H | -5.41542600 | -1.11445600 | -1.48365600 |
| C | -3.34668700 | -2.96757400 | -2.04378100 |
| H | -1.68249800 | -1.50279600 | -1.90492900 |
| H | -1.32512900 | -3.05959800 | -1.15280000 |
| C | -4.01282300 | -3.77675700 | 0.23767600  |
| H | -3.24633100 | -2.47843300 | 1.84682000  |
| H | -1.99247900 | -3.48755800 | 1.09973200  |
| H | -5.35169600 | -3.58318900 | -1.46487000 |
| H | -3.08985600 | -3.96546500 | -2.41288600 |
| H | -4.84206800 | -3.92493500 | 0.93636000  |
| H | -3.62553300 | -4.76680500 | -0.02588600 |
| O | -0.30420500 | 3.04646200  | -1.37603600 |
| N | -5.66265100 | 3.89833100  | -0.25238700 |
| N | -2.53802100 | -1.79079600 | -0.00637600 |
| H | -0.00955000 | 2.14588700  | -1.10665900 |
| H | -2.89056300 | 0.32938500  | 1.44486200  |
| O | -4.66123200 | -0.56201600 | 1.99117700  |
| C | -4.50176500 | -0.05349200 | 3.31469600  |
| H | -4.81753000 | 0.99421500  | 3.39104200  |
| H | -5.13575600 | -0.66614700 | 3.96062900  |
| H | -3.45810100 | -0.13624600 | 3.64967300  |
| C | 1.70027000  | 0.36882200  | 1.05883900  |
| H | 2.12917700  | 1.22190300  | 0.54691300  |
| H | -1.70152800 | -1.29830400 | 0.40285400  |
| H | 1.75435700  | 0.30719300  | 2.13812500  |
| N | 0.47887200  | -0.01027100 | 0.55820600  |
| O | -0.27673800 | -0.77342400 | 1.25020200  |
| O | 0.13957100  | 0.30661800  | -0.62564000 |
| H | -3.64632200 | -2.36780900 | -2.90971000 |
| C | 2.83335200  | -1.39049700 | -3.19396000 |
| C | 2.32932800  | -2.69036400 | -3.13582600 |
| C | 2.11193300  | -3.32789400 | -1.90561200 |
| C | 2.41666200  | -2.62053600 | -0.74697900 |
| C | 2.93534600  | -1.30905500 | -0.78829600 |
| C | 3.13680400  | -0.68986300 | -2.01711200 |
| N | 2.28925400  | -3.05959500 | 0.57946700  |
| C | 2.71949600  | -2.09420900 | 1.47163900  |
| C | 3.18909500  | -0.88500300 | 0.62956100  |
| O | 2.72528000  | -2.20181300 | 2.68373600  |
| H | 2.98973200  | -0.91255900 | -4.15688100 |
| H | 2.10198700  | -3.22399000 | -4.05519900 |
| H | 1.73282100  | -4.34456700 | -1.86401700 |
| H | 3.51881000  | 0.32323600  | -2.05060400 |

|   |            |             |             |
|---|------------|-------------|-------------|
| C | 1.81928900 | -4.36553900 | 0.98585200  |
| H | 2.47136800 | -5.15673000 | 0.59721100  |
| H | 1.83076300 | -4.39316400 | 2.07678600  |
| H | 0.79780800 | -4.54619700 | 0.63000200  |
| N | 4.28600000 | -0.29199700 | 1.12061200  |
| C | 4.82598700 | 0.79065200  | 0.49891600  |
| O | 4.25558200 | 1.58051200  | -0.26626100 |
| O | 6.11098300 | 0.94865400  | 0.91199200  |
| C | 6.93135900 | 2.08191800  | 0.48051800  |
| C | 8.26035800 | 1.81985300  | 1.19604000  |
| H | 8.98409800 | 2.60659500  | 0.95621100  |
| H | 8.11794600 | 1.79961900  | 2.28187500  |
| H | 8.68166300 | 0.85655500  | 0.88855100  |
| C | 6.31796400 | 3.40222300  | 0.96103200  |
| H | 5.36778700 | 3.60144300  | 0.46251100  |
| H | 6.14656100 | 3.37042100  | 2.04331100  |
| H | 7.00519100 | 4.23043100  | 0.75111500  |
| C | 7.13144900 | 2.05573900  | -1.03914500 |
| H | 7.85845600 | 2.82285600  | -1.33083900 |
| H | 7.52265200 | 1.08137400  | -1.35437700 |
| H | 6.19407100 | 2.24367900  | -1.56556600 |

**TS2-c-gau2-OS-S**

|   |             |             |             |
|---|-------------|-------------|-------------|
| C | -3.48094700 | 0.89134500  | -0.81454700 |
| C | -4.62632000 | -0.08494800 | -0.54715200 |
| C | -4.34712500 | -1.43665300 | -0.16935400 |
| C | -5.94484800 | 0.30361900  | -0.64435400 |
| C | -3.03617400 | -1.94638800 | -0.02047300 |
| C | -5.46230700 | -2.29984900 | 0.08123600  |
| C | -6.97273100 | -0.63368100 | -0.37764600 |
| H | -6.19948600 | 1.31843700  | -0.93161100 |
| C | -2.81802100 | -3.25234400 | 0.38083600  |
| H | -2.17038200 | -1.32305600 | -0.19657400 |
| C | -5.20608900 | -3.64581200 | 0.46688300  |
| H | -8.01337900 | -0.32193400 | -0.45875500 |
| C | -3.92306900 | -4.11517600 | 0.61735500  |
| H | -6.06249400 | -4.28868600 | 0.64744000  |
| H | -3.72901800 | -5.13949200 | 0.92114800  |
| C | -2.85285000 | 1.35617000  | 0.52417100  |
| H | -2.80711900 | 0.48141700  | 1.17435500  |
| C | -3.58393000 | 2.51746900  | 1.24086200  |
| C | -0.72563900 | 1.76748900  | 1.71968200  |
| C | -1.23505800 | 3.10333800  | -0.29971600 |
| C | -2.54093100 | 3.49993400  | 1.81124700  |



|   |             |             |             |
|---|-------------|-------------|-------------|
| H | -4.23855200 | 3.04097000  | 0.53927000  |
| H | -4.20941600 | 2.10936800  | 2.04052400  |
| C | -1.50947900 | 2.72065900  | 2.65028600  |
| H | -0.71530900 | 0.73256900  | 2.06582500  |
| H | 0.30775200  | 2.07100600  | 1.54456000  |
| C | -1.81407500 | 4.18702700  | 0.63856700  |
| H | -1.76519000 | 3.05107100  | -1.24958000 |
| H | -0.16865400 | 3.22773000  | -0.49166100 |
| H | -3.04161600 | 4.24976400  | 2.43123500  |
| H | -0.81606300 | 3.41175600  | 3.14020100  |
| H | -2.50944000 | 4.82285700  | 0.08156100  |
| H | -1.01360200 | 4.83098600  | 1.01828300  |
| O | -1.57530200 | -3.75640400 | 0.56244400  |
| N | -6.75796400 | -1.88701900 | -0.02749300 |
| N | -1.39076600 | 1.75468000  | 0.36044600  |
| H | -0.91466300 | -3.03574600 | 0.44407500  |
| H | -2.70338300 | 0.36077900  | -1.38387400 |
| O | -3.89170800 | 2.02990500  | -1.55684600 |
| C | -3.99959300 | 1.79009600  | -2.95880200 |
| H | -4.74658100 | 1.01895100  | -3.18495700 |
| H | -4.31160600 | 2.73397900  | -3.41283300 |
| H | -3.03350500 | 1.48523300  | -3.38554600 |
| C | 1.52531400  | -1.70328500 | -1.40302300 |
| H | 1.55117500  | -2.74593400 | -1.10875800 |
| H | -0.88260600 | 1.04418900  | -0.22122200 |
| H | 1.60927900  | -1.47017400 | -2.45693700 |
| N | 0.50961100  | -1.00648600 | -0.78632200 |
| O | 0.11903500  | 0.08070500  | -1.30946000 |
| O | 0.03681900  | -1.39808500 | 0.32572200  |
| H | -2.01720500 | 2.15540900  | 3.43941400  |
| C | 3.33470500  | -1.92232500 | 2.96132500  |
| C | 4.08214100  | -3.09188200 | 2.81972200  |
| C | 4.51910800  | -3.51956900 | 1.55894800  |
| C | 4.18235500  | -2.73936400 | 0.45821200  |
| C | 3.43111400  | -1.55067300 | 0.58047900  |
| C | 3.00033300  | -1.14694300 | 1.84123700  |
| N | 4.51512700  | -2.98044700 | -0.88226000 |
| C | 4.02659600  | -1.98909300 | -1.70910900 |
| C | 3.27068100  | -0.97539700 | -0.80289300 |
| O | 4.16321800  | -1.94158400 | -2.91789600 |
| H | 3.00355900  | -1.60886000 | 3.94751100  |
| H | 4.33260100  | -3.68418200 | 3.69597100  |
| H | 5.10263600  | -4.42819500 | 1.44924600  |
| H | 2.42155900  | -0.23912800 | 1.94121600  |

|   |            |             |             |
|---|------------|-------------|-------------|
| C | 5.29416400 | -4.10477100 | -1.35970200 |
| H | 6.29607700 | -4.10225300 | -0.91545100 |
| H | 4.80066100 | -5.05359900 | -1.11980300 |
| H | 5.38084000 | -4.00705800 | -2.44306400 |
| N | 3.44801800 | 0.29113400  | -1.20472700 |
| C | 3.16896000 | 1.36815200  | -0.42479600 |
| O | 2.37585200 | 1.47759400  | 0.51842800  |
| O | 3.91351300 | 2.41884200  | -0.88520800 |
| C | 3.98436700 | 3.69756100  | -0.18580600 |
| C | 4.99932100 | 4.48138700  | -1.02513700 |
| H | 5.15910400 | 5.47879500  | -0.60068000 |
| H | 5.96106400 | 3.95847600  | -1.05431600 |
| H | 4.64321400 | 4.59642000  | -2.05470200 |
| C | 4.51166900 | 3.50167800  | 1.24094100  |
| H | 3.80859000 | 2.92687900  | 1.84688200  |
| H | 5.47062900 | 2.97123700  | 1.22234900  |
| H | 4.67247200 | 4.47550100  | 1.71839600  |
| C | 2.62663000 | 4.40927200  | -0.20307100 |
| H | 2.73452600 | 5.43188700  | 0.17821300  |
| H | 2.24240400 | 4.46975200  | -1.22797700 |
| H | 1.90188200 | 3.87978800  | 0.41721600  |

**TS2-c-anti-OS-S**

|   |             |             |             |
|---|-------------|-------------|-------------|
| C | -3.44668500 | 0.03446300  | -1.42451800 |
| C | -4.47299500 | -1.02244800 | -1.01776100 |
| C | -4.16221700 | -1.96884700 | 0.00960900  |
| C | -5.71775700 | -1.08455600 | -1.60585700 |
| C | -2.92422300 | -1.99605900 | 0.69444100  |
| C | -5.17230500 | -2.92240000 | 0.35938300  |
| C | -6.64159900 | -2.07268500 | -1.18649500 |
| H | -5.99134900 | -0.38747400 | -2.39107300 |
| C | -2.68428200 | -2.91504200 | 1.70126300  |
| H | -2.14072400 | -1.28803000 | 0.46163000  |
| C | -4.88817200 | -3.86902000 | 1.38359000  |
| H | -7.62310100 | -2.11917000 | -1.65674700 |
| C | -3.68194800 | -3.86989800 | 2.04143000  |
| H | -5.66250500 | -4.58859500 | 1.63232200  |
| H | -3.46869500 | -4.58774000 | 2.82766300  |
| C | -3.39393700 | 1.15484300  | -0.35489500 |
| H | -3.46103700 | 0.66843600  | 0.61928800  |
| C | -4.47659900 | 2.25397200  | -0.48426100 |
| C | -1.89688700 | 2.58916000  | 0.99112700  |
| C | -1.82934100 | 2.78973200  | -1.46978100 |
| C | -3.83832900 | 3.63056800  | -0.21020300 |

|   |             |             |             |
|---|-------------|-------------|-------------|
| H | -4.90737600 | 2.23941200  | -1.48853200 |
| H | -5.28203900 | 2.05167600  | 0.22819500  |
| C | -3.07544100 | 3.57950700  | 1.12796000  |
| H | -1.86493200 | 1.83610300  | 1.78060300  |
| H | -0.92573300 | 3.08691100  | 0.95592500  |
| C | -2.84363900 | 3.95092200  | -1.34435500 |
| H | -1.97305900 | 2.21037400  | -2.38033900 |
| H | -0.78978500 | 3.11917600  | -1.41805200 |
| H | -4.61741500 | 4.39771800  | -0.16897800 |
| H | -2.69592800 | 4.57182100  | 1.39189600  |
| H | -3.37756400 | 4.07610000  | -2.29153200 |
| H | -2.32361100 | 4.89178300  | -1.13476000 |
| O | -1.52309400 | -2.95093900 | 2.39240300  |
| N | -6.39506300 | -2.96183100 | -0.24397900 |
| N | -2.03223400 | 1.84056800  | -0.31377600 |
| H | -0.94802000 | -2.20391500 | 2.10635300  |
| H | -2.45665700 | -0.44313800 | -1.46434000 |
| O | -3.72296400 | 0.61775800  | -2.68909800 |
| C | -3.32778500 | -0.19255700 | -3.79502500 |
| H | -3.86413400 | -1.14921500 | -3.81273700 |
| H | -3.57520800 | 0.37235100  | -4.69732100 |
| H | -2.24657600 | -0.38963300 | -3.77741200 |
| C | 1.71468600  | -1.20950500 | 0.37299500  |
| H | 1.80676300  | -2.00827700 | 1.09827100  |
| H | -1.26571800 | 1.11992800  | -0.33852500 |
| H | 2.08068300  | -1.35494100 | -0.63599500 |
| N | 0.49621000  | -0.57409200 | 0.41911800  |
| O | 0.12473400  | 0.11893900  | -0.58344100 |
| O | -0.20817600 | -0.58188100 | 1.47991500  |
| H | -3.74816000 | 3.26391800  | 1.93249000  |
| C | 2.70983800  | 3.26450900  | -0.88833100 |
| C | 2.24308800  | 3.99188300  | 0.20847500  |
| C | 2.09380000  | 3.38804500  | 1.46630300  |
| C | 2.43362200  | 2.04325000  | 1.58441400  |
| C | 2.91751000  | 1.29727000  | 0.48815300  |
| C | 3.04731900  | 1.90877000  | -0.75379100 |
| N | 2.38563200  | 1.25117600  | 2.73908900  |
| C | 2.84964600  | -0.02793300 | 2.48963900  |
| C | 3.23165100  | -0.08251500 | 0.99230600  |
| O | 2.92913800  | -0.92518600 | 3.30719100  |
| H | 2.81945700  | 3.75106400  | -1.85357700 |
| H | 1.99596900  | 5.04448500  | 0.09445400  |
| H | 1.74550800  | 3.95921600  | 2.32141800  |
| H | 3.40247500  | 1.33267200  | -1.59961700 |

|   |            |             |             |
|---|------------|-------------|-------------|
| C | 1.90767700 | 1.68639500  | 4.03407300  |
| H | 2.49288500 | 2.53678600  | 4.40230200  |
| H | 0.85057100 | 1.97382000  | 3.98577900  |
| H | 2.01963900 | 0.84801700  | 4.72348600  |
| N | 4.33013700 | -0.80994500 | 0.74393400  |
| C | 4.78247900 | -0.97118000 | -0.52789300 |
| O | 4.13253900 | -0.86307700 | -1.57763800 |
| O | 6.08244400 | -1.36685800 | -0.49358700 |
| C | 6.81795800 | -1.72435900 | -1.70787600 |
| C | 8.19938400 | -2.09672000 | -1.16044100 |
| H | 8.86436100 | -2.40197800 | -1.97580900 |
| H | 8.65437300 | -1.24403900 | -0.64462600 |
| H | 8.12300600 | -2.92419200 | -0.44688500 |
| C | 6.92551200 | -0.51899600 | -2.64940500 |
| H | 5.94909000 | -0.24410500 | -3.05211000 |
| H | 7.34115200 | 0.34395800  | -2.11615500 |
| H | 7.59610400 | -0.75599900 | -3.48404800 |
| C | 6.16881800 | -2.93433600 | -2.38955900 |
| H | 6.79750900 | -3.27583200 | -3.22041200 |
| H | 6.06654700 | -3.76254400 | -1.67891500 |
| H | 5.18040500 | -2.68349000 | -2.77850300 |

**TS2-c-anti-SS-S**

|   |             |             |             |
|---|-------------|-------------|-------------|
| C | -3.53475500 | -0.18056600 | 0.55265600  |
| C | -3.96704100 | 1.28344400  | 0.46236700  |
| C | -3.07761900 | 2.26535400  | -0.07719300 |
| C | -5.22227400 | 1.69027000  | 0.86084900  |
| C | -1.76894700 | 1.96448500  | -0.52078600 |
| C | -3.56150200 | 3.60995700  | -0.18482500 |
| C | -5.59306500 | 3.05051300  | 0.72550600  |
| H | -5.92543600 | 0.97785200  | 1.27991800  |
| C | -0.96773400 | 2.94073000  | -1.08522100 |
| H | -1.36475100 | 0.96388400  | -0.44122500 |
| C | -2.70331400 | 4.59609400  | -0.74711500 |
| H | -6.58484300 | 3.36732900  | 1.04596800  |
| C | -1.44339900 | 4.27634000  | -1.19342400 |
| H | -3.08184400 | 5.61145300  | -0.81810000 |
| H | -0.79256700 | 5.02771000  | -1.63042200 |
| C | -3.61865800 | -0.82888900 | -0.85072300 |
| H | -3.18540100 | -0.11583000 | -1.55349700 |
| C | -5.04401200 | -1.23443300 | -1.30293200 |
| C | -2.52931300 | -2.36014300 | -2.45834100 |
| C | -3.28441900 | -3.26675100 | -0.28906100 |
| C | -4.98576900 | -2.59934900 | -2.01764700 |
| H | -5.70708500 | -1.30061400 | -0.43632000 |

|   |             |             |             |
|---|-------------|-------------|-------------|
| H | -5.44200900 | -0.46363300 | -1.96941700 |
| C | -3.91155800 | -2.54952000 | -3.12128800 |
| H | -1.95447000 | -1.53146100 | -2.87584100 |
| H | -1.91128300 | -3.25908800 | -2.49830200 |
| C | -4.59926100 | -3.68229000 | -0.98991900 |
| H | -3.44075100 | -2.98351800 | 0.75019100  |
| H | -2.51068100 | -4.03540900 | -0.33797300 |
| H | -5.96199300 | -2.83026000 | -2.45407200 |
| H | -3.91755300 | -3.47511300 | -3.70543500 |
| H | -5.39182400 | -3.79807300 | -0.24414000 |
| H | -4.47709800 | -4.64887800 | -1.49022400 |
| O | 0.27698700  | 2.68084600  | -1.54891200 |
| N | -4.80913400 | 3.98346800  | 0.22065700  |
| N | -2.72182000 | -2.05382100 | -0.98945400 |
| H | 0.48160900  | 1.73033600  | -1.42112800 |
| H | -2.48758900 | -0.21524900 | 0.88838400  |
| O | -4.32968100 | -0.93260700 | 1.45818300  |
| C | -3.98053700 | -0.73312700 | 2.82587200  |
| H | -4.11314400 | 0.31122300  | 3.13423000  |
| H | -4.64766700 | -1.36747400 | 3.41500100  |
| H | -2.93908800 | -1.02909700 | 3.01715500  |
| C | 2.06608600  | -1.54600700 | -0.96882300 |
| H | 2.34507100  | -2.59166800 | -0.97953100 |
| H | -1.75574900 | -1.87458800 | -0.61729700 |
| H | 2.57143200  | -0.84518400 | -1.62099800 |
| N | 0.70582800  | -1.35196600 | -0.92184700 |
| O | 0.19233600  | -0.26650300 | -1.32750800 |
| O | -0.03855400 | -2.24268400 | -0.39133800 |
| H | -4.12013600 | -1.72610000 | -3.81222300 |
| C | 1.52641200  | 2.36657300  | 1.70136900  |
| C | 0.70252000  | 1.88702900  | 2.72044900  |
| C | 0.65767200  | 0.52021100  | 3.03151500  |
| C | 1.46447700  | -0.33883500 | 2.29274300  |
| C | 2.30100300  | 0.12898400  | 1.25626500  |
| C | 2.32810100  | 1.48708300  | 0.95777200  |
| N | 1.60838600  | -1.72418500 | 2.45481900  |
| C | 2.53610200  | -2.23971300 | 1.57030300  |
| C | 3.04733100  | -1.05583000 | 0.71812400  |
| O | 2.86703400  | -3.40887800 | 1.49086800  |
| H | 1.54287100  | 3.42773600  | 1.47221100  |
| H | 0.08449900  | 2.57954200  | 3.28596900  |
| H | 0.02747800  | 0.15159500  | 3.83514600  |
| H | 2.96024700  | 1.84960500  | 0.15614400  |
| C | 0.87537900  | -2.53447300 | 3.40186800  |

|   |             |             |             |
|---|-------------|-------------|-------------|
| H | 1.03260300  | -2.17857000 | 4.42645500  |
| H | -0.19905900 | -2.52083600 | 3.18101500  |
| H | 1.24627800  | -3.55717700 | 3.31510100  |
| N | 4.34325700  | -1.13615000 | 0.39599900  |
| C | 4.92662200  | -0.18562600 | -0.38236000 |
| O | 4.36911100  | 0.57828700  | -1.18234100 |
| O | 6.27619100  | -0.24531100 | -0.22484700 |
| C | 7.18617400  | 0.59024100  | -1.00996300 |
| C | 8.56196400  | 0.16328100  | -0.48818700 |
| H | 9.35488800  | 0.71812600  | -1.00178900 |
| H | 8.64628500  | 0.35636500  | 0.58680500  |
| H | 8.72466700  | -0.90686800 | -0.65622900 |
| C | 6.94328300  | 2.07567000  | -0.71798100 |
| H | 5.96948700  | 2.39800000  | -1.09058200 |
| H | 6.98610500  | 2.26310500  | 0.36126800  |
| H | 7.72095900  | 2.68171500  | -1.19781400 |
| C | 7.05716100  | 0.26625500  | -2.50292900 |
| H | 7.83208600  | 0.79718200  | -3.06850600 |
| H | 7.19089400  | -0.80847800 | -2.67210800 |
| H | 6.07889100  | 0.56202400  | -2.88548700 |

### 3.4 TS2s involving Z-ketimine

#### a'-N-gau1-syn-R

|   |             |             |             |
|---|-------------|-------------|-------------|
| C | -2.96790300 | -0.30196100 | -0.73444100 |
| C | -3.51653100 | -1.12019100 | 0.43372700  |
| C | -2.70573800 | -1.42254900 | 1.57535200  |
| C | -4.83523200 | -1.52716900 | 0.43666100  |
| C | -1.32466500 | -1.11189400 | 1.67683600  |
| C | -3.35976900 | -2.07372700 | 2.67726000  |
| C | -5.36479600 | -2.19319500 | 1.56485400  |
| H | -5.46882900 | -1.33365600 | -0.42252800 |
| C | -0.60797000 | -1.42457100 | 2.82575900  |
| H | -0.79375500 | -0.64918600 | 0.85146200  |
| C | -2.60572000 | -2.34852800 | 3.85160300  |
| H | -6.40668900 | -2.51155500 | 1.56125700  |
| C | -1.27476900 | -2.02952700 | 3.93048800  |
| H | -3.11974100 | -2.83122900 | 4.67755600  |
| H | -0.69172100 | -2.25141000 | 4.81938400  |
| C | -3.06680300 | 1.19998100  | -0.37374500 |
| H | -2.66471200 | 1.30154100  | 0.63668000  |
| C | -4.49034700 | 1.80621400  | -0.45659900 |
| C | -1.96918600 | 3.40655100  | -0.52884200 |

|   |             |             |             |
|---|-------------|-------------|-------------|
| C | -2.65720500 | 2.28811300  | -2.61540000 |
| C | -4.41198200 | 3.21683500  | -1.07343100 |
| H | -5.13265100 | 1.17186900  | -1.07319700 |
| H | -4.92535000 | 1.84567300  | 0.54623900  |
| C | -3.36023500 | 4.04381400  | -0.31010900 |
| H | -1.42696600 | 3.22008000  | 0.39897200  |
| H | -1.32199900 | 3.99736800  | -1.17686000 |
| C | -3.97648000 | 3.09161700  | -2.54684300 |
| H | -2.79370800 | 1.30161000  | -3.05420600 |
| H | -1.86499800 | 2.81295700  | -3.15330000 |
| H | -5.39090900 | 3.70220900  | -1.01251100 |
| H | -3.35265700 | 5.07916900  | -0.66642600 |
| H | -4.74925100 | 2.57988200  | -3.12907100 |
| H | -3.84209100 | 4.08661000  | -2.98463700 |
| O | 0.70279600  | -1.17684300 | 2.97480900  |
| N | -4.67071800 | -2.44693000 | 2.65752200  |
| N | -2.14136500 | 2.07120900  | -1.21404500 |
| H | 1.14410800  | -1.00920000 | 2.08685400  |
| H | -1.91030500 | -0.55077500 | -0.89152800 |
| O | -3.68130000 | -0.52800400 | -1.94397900 |
| C | -3.32131900 | -1.74265200 | -2.59721700 |
| H | -3.51768500 | -2.61864500 | -1.96663500 |
| H | -3.93465700 | -1.80683100 | -3.49969700 |
| H | -2.25965800 | -1.73942900 | -2.88230000 |
| C | 2.48095000  | 1.03392800  | -1.60591200 |
| H | 2.55128200  | 0.10711600  | -2.15460900 |
| H | -1.19458900 | 1.60734300  | -1.28275200 |
| H | 3.21706600  | 1.81451600  | -1.74751100 |
| N | 1.20468000  | 1.51202100  | -1.46172100 |
| O | 0.99346100  | 2.71581900  | -1.16799200 |
| O | 0.23298300  | 0.68007800  | -1.53303700 |
| H | -3.60621400 | 4.06939600  | 0.75688800  |
| C | 2.16087200  | 3.18764900  | 2.54665300  |
| C | 3.45745500  | 3.70581900  | 2.53258500  |
| C | 4.49147700  | 3.06815300  | 1.83024200  |
| C | 4.17752600  | 1.90206400  | 1.14273200  |
| C | 2.87140900  | 1.37694800  | 1.13606200  |
| C | 1.85894900  | 2.01449600  | 1.84041200  |
| N | 5.02929700  | 1.06900500  | 0.40362200  |
| C | 4.35923500  | -0.04689800 | -0.07529300 |
| C | 2.87255900  | 0.14632600  | 0.31008200  |
| O | 4.88285300  | -0.98489000 | -0.65060500 |
| H | 1.38235300  | 3.69435300  | 3.10962200  |
| H | 3.67855800  | 4.61616500  | 3.08352800  |

|   |            |             |             |
|---|------------|-------------|-------------|
| H | 5.49982200 | 3.46965900  | 1.83779900  |
| H | 0.85820000 | 1.59631700  | 1.85909500  |
| C | 6.45901200 | 1.25691700  | 0.26000300  |
| H | 6.67901100 | 2.19279800  | -0.26611600 |
| H | 6.95104400 | 1.27454500  | 1.23943000  |
| H | 6.84555300 | 0.41745100  | -0.31998200 |
| N | 2.01777100 | -0.83859600 | 0.56235700  |
| C | 2.02233700 | -2.07583300 | -0.06375200 |
| O | 1.74449400 | -3.10062100 | 0.54169600  |
| O | 2.24090500 | -2.01378300 | -1.39981500 |
| C | 2.28679200 | -3.22862700 | -2.22865800 |
| C | 2.61241600 | -2.67653800 | -3.61924300 |
| H | 2.65880400 | -3.49329100 | -4.34812900 |
| H | 1.84261500 | -1.96895400 | -3.94736800 |
| H | 3.57890300 | -2.16185700 | -3.61703200 |
| C | 0.91689700 | -3.91533600 | -2.23349600 |
| H | 0.66923000 | -4.31066900 | -1.24708800 |
| H | 0.13688900 | -3.20532600 | -2.53307800 |
| H | 0.91884300 | -4.74060900 | -2.95528900 |
| C | 3.40463700 | -4.15809400 | -1.74677800 |
| H | 3.53281400 | -4.98112400 | -2.45977900 |
| H | 4.34750000 | -3.60635600 | -1.67892300 |
| H | 3.17409900 | -4.57833000 | -0.76628400 |

**a'-N-gau1-syn-R-Boc-rotator**

|   |            |             |             |
|---|------------|-------------|-------------|
| C | 2.94811100 | -0.04048100 | -0.77808100 |
| C | 3.42874800 | 1.03073400  | 0.19987700  |
| C | 2.54630600 | 1.59547400  | 1.17693800  |
| C | 4.74896100 | 1.43232100  | 0.19569200  |
| C | 1.15793800 | 1.30832800  | 1.25782600  |
| C | 3.13045500 | 2.50131900  | 2.12733400  |
| C | 5.20837700 | 2.35554000  | 1.16190500  |
| H | 5.43671900 | 1.03985900  | -0.54589800 |
| C | 0.36919500 | 1.88767000  | 2.24471700  |
| H | 0.68145800 | 0.64839400  | 0.54008600  |
| C | 2.30158900 | 3.05269300  | 3.14304200  |
| H | 6.25192300 | 2.66833100  | 1.15323300  |
| C | 0.96513000 | 2.75342800  | 3.20753900  |
| H | 2.76405600 | 3.72814600  | 3.85688900  |
| H | 0.32609800 | 3.18301300  | 3.97338100  |
| C | 3.00490000 | -1.41905000 | -0.07454600 |
| H | 2.54172600 | -1.28535900 | 0.90581300  |
| C | 4.42188000 | -2.02865500 | 0.07260500  |
| C | 1.88267500 | -3.59886400 | 0.21073100  |



|   |             |             |             |
|---|-------------|-------------|-------------|
| C | 2.71034500  | -2.99204300 | -2.02705500 |
| C | 4.35666500  | -3.54342400 | -0.20826100 |
| H | 5.11034200  | -1.55377600 | -0.63140600 |
| H | 4.79452000  | -1.83800300 | 1.08303300  |
| C | 3.24753100  | -4.16913600 | 0.65927200  |
| H | 1.28609000  | -3.20442900 | 1.03455500  |
| H | 1.26855400  | -4.32194600 | -0.32555200 |
| C | 4.01156300  | -3.75892400 | -1.69594900 |
| H | 2.88639200  | -2.13500400 | -2.67435800 |
| H | 1.94228800  | -3.62598000 | -2.47520400 |
| H | 5.32163200  | -4.00526500 | 0.02175500  |
| H | 3.24542000  | -5.25899800 | 0.55440100  |
| H | 4.82566100  | -3.39397800 | -2.33024400 |
| H | 3.89026100  | -4.82784400 | -1.90249900 |
| O | -0.95123500 | 1.67336600  | 2.36435600  |
| N | 4.44385200  | 2.86575200  | 2.10775500  |
| N | 2.11797200  | -2.45747000 | -0.74791500 |
| H | -1.34128100 | 1.29963200  | 1.51692100  |
| H | 1.90708800  | 0.16344500  | -1.05911300 |
| O | 3.74133300  | -0.09823200 | -1.95658800 |
| C | 3.43010700  | 0.92115100  | -2.90359800 |
| H | 3.59823600  | 1.92467500  | -2.49246400 |
| H | 4.09694800  | 0.76851400  | -3.75614900 |
| H | 2.38702000  | 0.84434300  | -3.24137300 |
| C | -2.39075100 | -1.48844700 | -1.76557400 |
| H | -2.38287400 | -0.63442500 | -2.42867200 |
| H | 1.18308400  | -2.01298200 | -0.97714200 |
| H | -3.13543600 | -2.26886200 | -1.84611800 |
| N | -1.16072200 | -1.93958200 | -1.38898200 |
| O | -1.00650000 | -3.08438200 | -0.88861500 |
| O | -0.16324200 | -1.13304600 | -1.47550800 |
| H | 3.42851700  | -3.94547300 | 1.71630000  |
| C | -2.38335500 | -2.74910200 | 2.80374700  |
| C | -3.65282900 | -3.33090300 | 2.77358900  |
| C | -4.63338400 | -2.89984300 | 1.86733900  |
| C | -4.29611500 | -1.87244900 | 0.99451000  |
| C | -3.01474100 | -1.28570100 | 1.00473300  |
| C | -2.05464200 | -1.72016600 | 1.91035300  |
| N | -5.09901500 | -1.24923200 | 0.03160100  |
| C | -4.42314300 | -0.21085800 | -0.59672400 |
| C | -2.98048700 | -0.24682600 | -0.04358800 |
| O | -4.91660400 | 0.57440100  | -1.38468300 |
| H | -1.64775100 | -3.09421400 | 3.52454800  |
| H | -3.89519000 | -4.12899700 | 3.47036100  |

|   |             |             |             |
|---|-------------|-------------|-------------|
| H | -5.62144600 | -3.34892200 | 1.86079100  |
| H | -1.07645900 | -1.25161000 | 1.93886300  |
| C | -6.49969200 | -1.53877200 | -0.19844500 |
| H | -6.63343200 | -2.57008400 | -0.54419800 |
| H | -7.08440200 | -1.39126400 | 0.71721400  |
| H | -6.85736600 | -0.85095700 | -0.96643500 |
| N | -2.17437700 | 0.80158300  | 0.03617300  |
| C | -2.10771800 | 1.74876200  | -0.97513200 |
| O | -2.19271300 | 1.54901100  | -2.17907400 |
| O | -1.81955300 | 2.94800100  | -0.41494600 |
| C | -1.59996000 | 4.14954800  | -1.23252700 |
| C | -1.33101200 | 5.22563300  | -0.17739300 |
| H | -1.15456800 | 6.19316700  | -0.65986500 |
| H | -2.18741500 | 5.32766900  | 0.49774300  |
| H | -0.45055000 | 4.97289500  | 0.42287400  |
| C | -2.86321100 | 4.48473600  | -2.03195000 |
| H | -3.08057600 | 3.71319400  | -2.77235600 |
| H | -3.72515300 | 4.57969100  | -1.36181900 |
| H | -2.72911300 | 5.44173400  | -2.54980600 |
| C | -0.37374000 | 3.96229000  | -2.13252500 |
| H | -0.13204600 | 4.90938600  | -2.62907000 |
| H | 0.49467600  | 3.66230000  | -1.53483000 |
| H | -0.55367300 | 3.20379400  | -2.89656900 |

**a'-N-gau2-syn-R**

|   |             |             |             |
|---|-------------|-------------|-------------|
| C | 3.19175900  | 0.17685300  | 0.25826400  |
| C | 3.53061100  | -1.05654100 | -0.58301000 |
| C | 2.52025300  | -1.89622300 | -1.16099500 |
| C | 4.85542000  | -1.37058200 | -0.81478000 |
| C | 1.12345700  | -1.72985500 | -0.96161200 |
| C | 2.98212000  | -2.98464600 | -1.98156100 |
| C | 5.19181400  | -2.47184900 | -1.63248600 |
| H | 5.64459800  | -0.78235700 | -0.35880600 |
| C | 0.21466800  | -2.60827400 | -1.53717300 |
| H | 0.73378400  | -0.92155600 | -0.35630900 |
| C | 2.02220300  | -3.84380700 | -2.58300800 |
| H | 6.23989900  | -2.70753000 | -1.81405000 |
| C | 0.67975000  | -3.66549400 | -2.37071800 |
| H | 2.39341700  | -4.65344800 | -3.20442300 |
| H | -0.05592000 | -4.32860300 | -2.81639300 |
| C | 3.12716100  | 1.43596400  | -0.64558000 |
| H | 2.59386500  | 1.14574600  | -1.55271200 |
| C | 4.49749000  | 2.08656200  | -0.98462400 |
| C | 2.05358700  | 3.62409000  | -1.06116200 |

|   |             |             |             |
|---|-------------|-------------|-------------|
| C | 2.77780500  | 3.09773600  | 1.23359400  |
| C | 4.50181300  | 3.56354900  | -0.53640400 |
| H | 5.29999700  | 1.55159500  | -0.47413000 |
| H | 4.68316800  | 2.01698800  | -2.06102800 |
| C | 3.40642900  | 4.33125200  | -1.29880700 |
| H | 1.66104200  | 3.15074500  | -1.96343600 |
| H | 1.27894200  | 4.27913000  | -0.66125800 |
| C | 4.20395900  | 3.63384000  | 0.97470300  |
| H | 2.75551800  | 2.31210400  | 1.98687000  |
| H | 2.07429100  | 3.88045700  | 1.52610800  |
| H | 5.48216100  | 4.00388100  | -0.74273600 |
| H | 3.36031100  | 5.36876800  | -0.95066100 |
| H | 4.93173500  | 3.03089300  | 1.52437400  |
| H | 4.28507800  | 4.66615600  | 1.33003900  |
| O | -1.11948800 | -2.53204000 | -1.36933100 |
| N | 4.29905700  | -3.25119500 | -2.21023700 |
| N | 2.23782000  | 2.51958100  | -0.04678000 |
| H | -1.40993100 | -1.88090500 | -0.66215100 |
| H | 2.20900400  | 0.03640400  | 0.72767600  |
| O | 4.16074200  | 0.41851900  | 1.27199400  |
| C | 4.08082100  | -0.47341100 | 2.37852500  |
| H | 4.24189300  | -1.51543000 | 2.07563700  |
| H | 4.87277700  | -0.17990700 | 3.07281800  |
| H | 3.11012900  | -0.39208100 | 2.88802200  |
| C | -2.02499100 | 1.40668600  | -1.34388000 |
| H | -2.71036300 | 2.13358900  | -1.75922300 |
| H | 1.28377400  | 2.08939800  | 0.10513900  |
| H | -1.71934200 | 0.55437500  | -1.93218600 |
| N | -1.02523300 | 1.95249100  | -0.58716800 |
| O | -0.07156400 | 1.17145900  | -0.22435500 |
| O | -1.06521800 | 3.13960900  | -0.19123000 |
| H | 3.63136800  | 4.35737200  | -2.36992700 |
| C | -5.49464600 | -1.19455300 | -2.73246600 |
| C | -6.49352100 | -0.23049200 | -2.56297700 |
| C | -6.37963500 | 0.77845100  | -1.59638300 |
| C | -5.23164300 | 0.79377300  | -0.80940900 |
| C | -4.21097800 | -0.16311300 | -0.98475200 |
| C | -4.34286400 | -1.16860100 | -1.93546500 |
| N | -4.89590200 | 1.67304400  | 0.22394800  |
| C | -3.67071300 | 1.34224500  | 0.80029600  |
| C | -3.16673700 | 0.10480100  | 0.02809700  |
| O | -3.11734100 | 1.96763800  | 1.68335600  |
| H | -5.61284900 | -1.96904800 | -3.48469700 |
| H | -7.38222200 | -0.26230000 | -3.18783700 |

|   |             |             |             |
|---|-------------|-------------|-------------|
| H | -7.16618200 | 1.51482200  | -1.46408900 |
| H | -3.55993200 | -1.91161700 | -2.05814300 |
| C | -5.67810700 | 2.82146300  | 0.63035600  |
| H | -5.80316900 | 3.52571600  | -0.20087900 |
| H | -6.66742200 | 2.51447400  | 0.98905700  |
| H | -5.13920700 | 3.31497400  | 1.44093800  |
| N | -2.33222300 | -0.82693300 | 0.45832500  |
| C | -2.05117400 | -0.99980900 | 1.80040100  |
| O | -2.76691900 | -0.69582100 | 2.74314400  |
| O | -0.89718400 | -1.71458100 | 1.91613100  |
| C | -0.50565900 | -2.30800300 | 3.20049200  |
| C | 0.75237700  | -3.10298600 | 2.83955500  |
| H | 1.14901600  | -3.60666600 | 3.72798600  |
| H | 0.52824200  | -3.86240500 | 2.08304900  |
| H | 1.53165500  | -2.44585100 | 2.44042400  |
| C | -1.59596600 | -3.25790600 | 3.71078600  |
| H | -2.50318800 | -2.71569700 | 3.98057200  |
| H | -1.84331800 | -4.00026200 | 2.94335800  |
| H | -1.23178400 | -3.79354100 | 4.59522600  |
| C | -0.17880700 | -1.20772700 | 4.21604500  |
| H | 0.23309800  | -1.65207300 | 5.12988200  |
| H | 0.56986000  | -0.51905000 | 3.80605300  |
| H | -1.07093700 | -0.63480900 | 4.47438900  |

**a'-O-gau2-syn-R**

|   |            |             |             |
|---|------------|-------------|-------------|
| C | 3.32205400 | -0.18937800 | 1.17905000  |
| C | 4.16248700 | -1.05755500 | 0.24550500  |
| C | 3.55667200 | -1.78514600 | -0.82968100 |
| C | 5.53049600 | -1.13336200 | 0.40190600  |
| C | 2.16033700 | -1.80315900 | -1.09190800 |
| C | 4.43750700 | -2.52669800 | -1.68686800 |
| C | 6.29975100 | -1.91037000 | -0.49426400 |
| H | 6.01694000 | -0.60071700 | 1.21210600  |
| C | 1.65548000 | -2.50944900 | -2.17301600 |
| H | 1.46226400 | -1.27589300 | -0.44942300 |
| C | 3.88237300 | -3.24635900 | -2.78080800 |
| H | 7.37977500 | -1.96877200 | -0.36397200 |
| C | 2.53298400 | -3.23715400 | -3.02418000 |
| H | 4.56624600 | -3.80052100 | -3.41671900 |
| H | 2.10470700 | -3.78130700 | -3.86061200 |
| C | 2.95322200 | 1.13353500  | 0.46789900  |
| H | 2.61159900 | 0.86206200  | -0.53285900 |
| C | 4.07327500 | 2.19512500  | 0.37455500  |
| C | 1.12663500 | 2.73609700  | 0.08218500  |

|   |             |             |             |
|---|-------------|-------------|-------------|
| C | 2.07270800  | 2.56294400  | 2.35290800  |
| C | 3.44450900  | 3.59749500  | 0.52750100  |
| H | 4.81587200  | 2.03424600  | 1.16171300  |
| H | 4.58261200  | 2.09696500  | -0.58868700 |
| C | 2.22149100  | 3.71393000  | -0.40594300 |
| H | 0.71449200  | 2.11571800  | -0.71585600 |
| H | 0.29509800  | 3.22970800  | 0.58545600  |
| C | 2.96740000  | 3.76694400  | 1.98386400  |
| H | 2.57514500  | 1.86091900  | 3.01632300  |
| H | 1.11548800  | 2.85008200  | 2.79114900  |
| H | 4.18296700  | 4.36599500  | 0.28032000  |
| H | 1.83099100  | 4.73649300  | -0.39925400 |
| H | 3.82275800  | 3.81237900  | 2.66550700  |
| H | 2.41401800  | 4.70639500  | 2.09089600  |
| O | 0.34260500  | -2.55474200 | -2.48501700 |
| N | 5.78837100  | -2.58020200 | -1.50817000 |
| N | 1.73824800  | 1.79974300  | 1.09477800  |
| H | -0.19641600 | -2.01768600 | -1.85058300 |
| H | 2.38983200  | -0.72154600 | 1.41064100  |
| O | 3.99300200  | 0.11258100  | 2.39516500  |
| C | 3.90665900  | -0.92531800 | 3.36881000  |
| H | 4.36462000  | -1.85766000 | 3.01455600  |
| H | 4.45025100  | -0.57290100 | 4.24916900  |
| H | 2.86142500  | -1.12340800 | 3.64465700  |
| C | -2.20941500 | -0.43530700 | 2.31364400  |
| H | -1.98356300 | -1.46219200 | 2.57446400  |
| H | 1.02809100  | 1.06193100  | 1.34658300  |
| H | -2.97006200 | 0.08753200  | 2.87673300  |
| N | -1.09141700 | 0.33670100  | 2.09038100  |
| O | -1.21716100 | 1.57902500  | 2.00292800  |
| O | 0.03162100  | -0.23301700 | 1.85602300  |
| H | 2.51121500  | 3.48347900  | -1.43685600 |
| C | -6.43099000 | -1.97272700 | 2.01062000  |
| C | -6.15109200 | -3.29232400 | 1.64427200  |
| C | -4.98000300 | -3.62240300 | 0.94707600  |
| C | -4.10145200 | -2.58852800 | 0.64190300  |
| C | -4.36419500 | -1.26226000 | 1.01967800  |
| C | -5.53438900 | -0.94318300 | 1.69304600  |
| N | -2.88040800 | -2.65774500 | -0.05692300 |
| C | -2.31209600 | -1.41133700 | -0.19441300 |
| C | -3.24598900 | -0.41213900 | 0.51853700  |
| O | -1.23867300 | -1.15957200 | -0.73843800 |
| H | -7.35042300 | -1.74348900 | 2.54176000  |
| H | -6.85459900 | -4.08129700 | 1.89617400  |

|   |             |             |             |
|---|-------------|-------------|-------------|
| H | -4.77710000 | -4.64745700 | 0.65362000  |
| H | -5.74418600 | 0.08830000  | 1.96206300  |
| C | -2.30927500 | -3.89611300 | -0.55274900 |
| H | -2.10916700 | -4.58591800 | 0.27512900  |
| H | -2.99464200 | -4.37622700 | -1.25958100 |
| H | -1.37379600 | -3.67499900 | -1.06558000 |
| N | -3.43223500 | 0.85252100  | 0.17616500  |
| C | -3.07019800 | 1.34665400  | -1.04543800 |
| O | -3.05167000 | 0.72912900  | -2.10852600 |
| O | -2.86343600 | 2.69500400  | -0.95688300 |
| C | -2.85521600 | 3.53388500  | -2.15449100 |
| C | -2.71595700 | 4.94619800  | -1.57713500 |
| H | -2.69987700 | 5.68952100  | -2.38215200 |
| H | -3.55419900 | 5.17629700  | -0.91060000 |
| H | -1.78845300 | 5.04224000  | -1.00131200 |
| C | -4.18509000 | 3.40167600  | -2.90723400 |
| H | -4.30142200 | 2.40162000  | -3.32868800 |
| H | -5.02534300 | 3.59778400  | -2.23102300 |
| H | -4.22810600 | 4.13353800  | -3.72241400 |
| C | -1.65806100 | 3.20331400  | -3.05410400 |
| H | -1.61787100 | 3.90329500  | -3.89758100 |
| H | -0.71972900 | 3.30013800  | -2.49477800 |
| H | -1.73140300 | 2.18578600  | -3.44049200 |

**a'-O-anti-R**

|   |             |             |             |
|---|-------------|-------------|-------------|
| C | -3.43194200 | 0.27022000  | 0.66667100  |
| C | -3.57838600 | 1.79304900  | 0.64652900  |
| C | -2.46650700 | 2.66085700  | 0.38783400  |
| C | -4.82068400 | 2.36110900  | 0.84894200  |
| C | -1.12389400 | 2.22405600  | 0.23708200  |
| C | -2.75503600 | 4.06700700  | 0.29115600  |
| C | -4.98311100 | 3.76109900  | 0.75124900  |
| H | -5.67565200 | 1.73825400  | 1.08956900  |
| C | -0.10399700 | 3.13596800  | 0.00610200  |
| H | -0.86098700 | 1.17554400  | 0.30446900  |
| C | -1.69052400 | 4.96743500  | 0.01099900  |
| H | -5.96781200 | 4.20073300  | 0.90569500  |
| C | -0.40227300 | 4.52067600  | -0.13183200 |
| H | -1.93403300 | 6.02271600  | -0.06843000 |
| H | 0.41706300  | 5.20591700  | -0.32737500 |
| C | -3.70763600 | -0.29661600 | -0.74976900 |
| H | -3.17370300 | 0.34925800  | -1.44993100 |
| C | -5.20535400 | -0.42284200 | -1.14100200 |
| C | -3.11964300 | -2.02293200 | -2.42348700 |

|   |             |             |             |
|---|-------------|-------------|-------------|
| C | -3.68930000 | -2.75320400 | -0.13830800 |
| C | -5.49586100 | -1.85212500 | -1.64229000 |
| H | -5.83748200 | -0.20866800 | -0.27689100 |
| H | -5.44462600 | 0.30934300  | -1.91810900 |
| C | -4.59726200 | -2.16279200 | -2.85331600 |
| H | -2.59209900 | -1.23229800 | -2.96060300 |
| H | -2.54558600 | -2.94476800 | -2.53095700 |
| C | -5.18658000 | -2.85423500 | -0.51229300 |
| H | -3.53965100 | -2.49995500 | 0.90937600  |
| H | -3.12886600 | -3.66211700 | -0.36737100 |
| H | -6.54918600 | -1.93057600 | -1.92866500 |
| H | -4.79056700 | -3.17703800 | -3.21755200 |
| H | -5.80328600 | -2.62979000 | 0.36313000  |
| H | -5.42644400 | -3.87274500 | -0.83464500 |
| O | 1.19441400  | 2.78845500  | -0.11031700 |
| N | -4.00043600 | 4.59247400  | 0.46540400  |
| N | -3.05787700 | -1.65941700 | -0.95814200 |
| H | 1.35734500  | 1.88070100  | 0.24611200  |
| H | -2.40288100 | 0.00901800  | 0.94728800  |
| O | -4.33017300 | -0.35040200 | 1.57902700  |
| C | -3.96495000 | -0.18449200 | 2.94591700  |
| H | -3.96363700 | 0.87163300  | 3.24255900  |
| H | -4.71288100 | -0.72019400 | 3.53608700  |
| H | -2.97178000 | -0.61128600 | 3.14898800  |
| C | 1.63385300  | -1.13356500 | -1.55508500 |
| H | 2.17011200  | -1.71375000 | -2.29476400 |
| H | -2.03363600 | -1.55815300 | -0.73104000 |
| H | 1.61417700  | -0.05739400 | -1.66946100 |
| N | 0.36847700  | -1.65049900 | -1.29730000 |
| O | -0.49468300 | -0.87192400 | -0.75769500 |
| O | 0.10688400  | -2.85766800 | -1.48661400 |
| H | -4.81736900 | -1.47375600 | -3.67502100 |
| C | 3.66047200  | -5.03187900 | 0.09706600  |
| C | 2.88263200  | -5.29478100 | 1.22815200  |
| C | 2.16770600  | -4.27552400 | 1.87342100  |
| C | 2.25182900  | -2.99570500 | 1.33640800  |
| C | 3.01754100  | -2.72230000 | 0.19345100  |
| C | 3.73903000  | -3.73291700 | -0.42377600 |
| N | 1.65417500  | -1.80900600 | 1.80523300  |
| C | 2.00177400  | -0.72702300 | 1.03120600  |
| C | 2.95052800  | -1.25462300 | -0.07370800 |
| O | 1.54093300  | 0.40072300  | 1.18482400  |
| H | 4.21180400  | -5.83830900 | -0.37802200 |
| H | 2.83398700  | -6.30566900 | 1.62406100  |

|   |             |             |             |
|---|-------------|-------------|-------------|
| H | 1.57912900  | -4.48297100 | 2.76164200  |
| H | 4.35349600  | -3.51149500 | -1.29187100 |
| C | 0.73301400  | -1.73558600 | 2.92073000  |
| H | -0.14965400 | -2.35928900 | 2.73609600  |
| H | 1.21803900  | -2.07015400 | 3.84429000  |
| H | 0.42657200  | -0.69456300 | 3.03161000  |
| N | 4.01992500  | -0.62746800 | -0.55919000 |
| C | 4.45299000  | 0.57106300  | -0.05905100 |
| O | 4.42891600  | 0.93357900  | 1.11486000  |
| O | 5.04484300  | 1.28384100  | -1.06110300 |
| C | 5.73816500  | 2.54494000  | -0.79414500 |
| C | 6.20229600  | 2.97264400  | -2.19026300 |
| H | 6.75824400  | 3.91515800  | -2.13537900 |
| H | 6.85485600  | 2.21170900  | -2.63228900 |
| H | 5.34459800  | 3.11672800  | -2.85649700 |
| C | 6.94675200  | 2.30317200  | 0.11776900  |
| H | 6.62962000  | 1.97733400  | 1.11003100  |
| H | 7.60217600  | 1.53641800  | -0.31179000 |
| H | 7.52859800  | 3.22704700  | 0.22078700  |
| C | 4.77611200  | 3.58641700  | -0.21040800 |
| H | 5.26662200  | 4.56703500  | -0.18093700 |
| H | 3.87800900  | 3.67058600  | -0.83180500 |
| H | 4.46793500  | 3.31496900  | 0.80002000  |

**b'-N-gaul-syn-R**

|   |            |             |             |
|---|------------|-------------|-------------|
| C | 2.21764800 | -1.31142800 | -0.40402400 |
| C | 3.52065100 | -0.51445600 | -0.51801200 |
| C | 3.53836800 | 0.90434400  | -0.72696200 |
| C | 4.73191000 | -1.17554500 | -0.42585000 |
| C | 2.38598100 | 1.70045300  | -0.95895400 |
| C | 4.83339000 | 1.53666200  | -0.73834800 |
| C | 5.94273500 | -0.45233300 | -0.45988300 |
| H | 4.76765000 | -2.25482500 | -0.33110700 |
| C | 2.50323000 | 3.06224200  | -1.20367100 |
| H | 1.39581200 | 1.26235400  | -1.01743300 |
| C | 4.91095000 | 2.94179500  | -0.94301600 |
| H | 6.89005100 | -0.98253600 | -0.36781100 |
| C | 3.78398600 | 3.68608200  | -1.16980900 |
| H | 5.89792000 | 3.39495400  | -0.93517500 |
| H | 3.83710000 | 4.75602400  | -1.34831200 |
| C | 1.99701300 | -1.77205100 | 1.05974700  |
| H | 2.16522600 | -0.89556100 | 1.68945100  |
| C | 2.86823100 | -2.96680000 | 1.52735400  |
| C | 0.30861700 | -2.15254600 | 2.84390200  |



|   |             |             |             |
|---|-------------|-------------|-------------|
| C | 0.16673300  | -3.49187200 | 0.77983500  |
| C | 2.03209700  | -3.91257700 | 2.41134400  |
| H | 3.23633700  | -3.52084000 | 0.66039200  |
| H | 3.73401400  | -2.58786100 | 2.07688100  |
| C | 1.33572400  | -3.09174500 | 3.50986100  |
| H | 0.36695600  | -1.11668500 | 3.17213200  |
| H | -0.72041400 | -2.49427700 | 2.97884500  |
| C | 0.95791300  | -4.58537100 | 1.53474200  |
| H | 0.40802900  | -3.46632600 | -0.27987800 |
| H | -0.91363200 | -3.58843600 | 0.90097200  |
| H | 2.68284500  | -4.67145300 | 2.85620300  |
| H | 0.82675400  | -3.74978800 | 4.22159700  |
| H | 1.42646400  | -5.26080000 | 0.81185700  |
| H | 0.28631000  | -5.18674900 | 2.15714600  |
| O | 1.46156900  | 3.86189500  | -1.48219000 |
| N | 6.00481700  | 0.85859700  | -0.59050200 |
| N | 0.54058600  | -2.14066900 | 1.34478800  |
| H | 0.59512300  | 3.35797800  | -1.54768200 |
| H | 1.37276900  | -0.67188600 | -0.68425600 |
| O | 2.21713400  | -2.46712000 | -1.24102500 |
| C | 2.18690400  | -2.16487400 | -2.63515700 |
| H | 3.10575100  | -1.66105500 | -2.95972700 |
| H | 2.10073800  | -3.12160000 | -3.15712700 |
| H | 1.32715900  | -1.53082200 | -2.89166800 |
| C | -2.76038500 | 1.57776000  | -1.93157600 |
| H | -3.40256700 | 2.39227100  | -1.63001800 |
| H | -0.08995400 | -1.40117800 | 0.94273400  |
| H | -3.09876600 | 0.80059800  | -2.59766500 |
| N | -1.43781700 | 1.86018900  | -1.98842900 |
| O | -0.61550200 | 1.01734500  | -2.44934800 |
| O | -1.02107000 | 2.97916300  | -1.51862900 |
| H | 2.07477000  | -2.51243900 | 4.07399200  |
| C | -2.35689400 | -2.96283600 | -2.67895700 |
| C | -3.73913000 | -3.13028100 | -2.81125400 |
| C | -4.64533300 | -2.36648300 | -2.06075900 |
| C | -4.12100300 | -1.43927300 | -1.16756900 |
| C | -2.72856100 | -1.27043200 | -1.01315800 |
| C | -1.84274300 | -2.02141000 | -1.77934000 |
| N | -4.80214400 | -0.55596800 | -0.32759000 |
| C | -3.91983300 | 0.19455700  | 0.44455100  |
| C | -2.50808500 | -0.21758800 | -0.01831300 |
| O | -4.25214600 | 0.91978500  | 1.36521000  |
| H | -1.68002300 | -3.55782800 | -3.28492100 |
| H | -4.12541700 | -3.86314300 | -3.51448400 |

|   |             |             |             |
|---|-------------|-------------|-------------|
| H | -5.71608500 | -2.49719100 | -2.17982800 |
| H | -0.77433300 | -1.86275400 | -1.68982200 |
| C | -6.24142000 | -0.48588900 | -0.17700000 |
| H | -6.71836000 | -0.19347000 | -1.11925200 |
| H | -6.64878900 | -1.45120900 | 0.14558200  |
| H | -6.45644000 | 0.26550400  | 0.58429100  |
| N | -1.36406400 | -0.02044200 | 0.57937000  |
| C | -1.12936500 | 1.00475400  | 1.50994900  |
| O | -0.34188900 | 0.82802000  | 2.43499100  |
| O | -1.74101900 | 2.14408500  | 1.21907500  |
| C | -1.58231500 | 3.36754700  | 2.03812600  |
| C | -2.50680000 | 4.35664100  | 1.32702000  |
| H | -2.45150800 | 5.33618200  | 1.81458000  |
| H | -2.21068700 | 4.46103000  | 0.27961100  |
| H | -3.54442300 | 4.00820200  | 1.36369400  |
| C | -0.12878000 | 3.84254700  | 1.98238000  |
| H | 0.54244900  | 3.12986900  | 2.46652600  |
| H | 0.19035000  | 3.98304600  | 0.94516300  |
| H | -0.04183600 | 4.80472100  | 2.50065700  |
| C | -2.06379800 | 3.10014800  | 3.46634200  |
| H | -2.10713700 | 4.04631900  | 4.01811400  |
| H | -3.06853400 | 2.66559300  | 3.44999900  |
| H | -1.39373900 | 2.42025400  | 3.99638900  |

**a'-N-gau1-syn-S**

|   |             |             |             |
|---|-------------|-------------|-------------|
| C | -2.90635500 | -0.79659900 | -0.45408300 |
| C | -3.27330200 | -1.10708200 | 0.99643800  |
| C | -2.34129600 | -0.91766700 | 2.06783100  |
| C | -4.53251800 | -1.58785100 | 1.29603800  |
| C | -1.00854400 | -0.45037400 | 1.89997700  |
| C | -2.80189200 | -1.25625700 | 3.38686900  |
| C | -4.88220900 | -1.86964200 | 2.63460300  |
| H | -5.24906700 | -1.76811100 | 0.50181500  |
| C | -0.14118000 | -0.37540000 | 2.98500200  |
| H | -0.63986200 | -0.15425300 | 0.92278600  |
| C | -1.90170600 | -1.12619000 | 4.48079500  |
| H | -5.88020300 | -2.24103600 | 2.86481800  |
| C | -0.61226300 | -0.70737200 | 4.28989600  |
| H | -2.27201400 | -1.38471200 | 5.46850300  |
| H | 0.08540900  | -0.62459300 | 5.11792600  |
| C | -3.19018100 | 0.69260300  | -0.75771500 |
| H | -2.78285700 | 1.26589100  | 0.07836000  |
| C | -4.67872800 | 1.05373000  | -0.99604300 |
| C | -2.40563600 | 2.69816700  | -1.96656500 |

|   |             |             |             |
|---|-------------|-------------|-------------|
| C | -2.90857200 | 0.67028800  | -3.27006900 |
| C | -4.79445500 | 1.97247400  | -2.22826400 |
| H | -5.26105000 | 0.14479400  | -1.16543300 |
| H | -5.08142300 | 1.54737500  | -0.10656400 |
| C | -3.86959300 | 3.19157200  | -2.04411800 |
| H | -1.88906200 | 3.02858900  | -1.06316500 |
| H | -1.80900300 | 3.00185900  | -2.82916700 |
| C | -4.35172400 | 1.18718500  | -3.47883400 |
| H | -2.85161100 | -0.41438900 | -3.22583100 |
| H | -2.21361400 | 1.02994700  | -4.03200900 |
| H | -5.83113700 | 2.30329000  | -2.34449800 |
| H | -3.98481200 | 3.88877400  | -2.88035800 |
| H | -5.02637900 | 0.34239500  | -3.64919200 |
| H | -4.40143300 | 1.83053400  | -4.36385500 |
| O | 1.14526300  | -0.01015400 | 2.90642600  |
| N | -4.05706700 | -1.71495800 | 3.65191800  |
| N | -2.39086200 | 1.18991100  | -1.95378200 |
| H | 1.46342000  | 0.14822200  | 1.96808100  |
| H | -1.83532300 | -0.97899600 | -0.60917900 |
| O | -3.64226700 | -1.59179600 | -1.37653300 |
| C | -3.14610700 | -2.92404100 | -1.50419500 |
| H | -3.24357500 | -3.48461200 | -0.56571900 |
| H | -3.75460800 | -3.40898700 | -2.27214200 |
| H | -2.09416000 | -2.92528000 | -1.81812700 |
| C | 2.12524500  | -0.11504000 | -2.39238400 |
| H | 2.48044300  | -0.92418800 | -3.01654600 |
| H | -1.37792600 | 0.90135300  | -1.83302600 |
| H | 2.55663000  | 0.87507400  | -2.44196800 |
| N | 0.77793500  | -0.13040000 | -2.17242900 |
| O | 0.26199800  | 0.89120100  | -1.59165300 |
| O | 0.07065300  | -1.13866300 | -2.43698100 |
| H | -4.13703700 | 3.73332300  | -1.13070500 |
| C | 1.52072800  | -4.00484500 | 0.19927600  |
| C | 2.61647100  | -4.69318400 | -0.32514800 |
| C | 3.73476200  | -4.00918400 | -0.82405600 |
| C | 3.71352500  | -2.62046900 | -0.77810000 |
| C | 2.61094000  | -1.91062900 | -0.26133800 |
| C | 1.51105600  | -2.60333900 | 0.22977400  |
| N | 4.70961600  | -1.72659800 | -1.18524600 |
| C | 4.35309500  | -0.41039900 | -0.92080100 |
| C | 2.89902100  | -0.46273900 | -0.38168400 |
| O | 5.08807000  | 0.54901800  | -1.05924500 |
| H | 0.67005400  | -4.55677400 | 0.58842400  |
| H | 2.61132400  | -5.77984800 | -0.34370600 |

|   |            |             |             |
|---|------------|-------------|-------------|
| H | 4.58820500 | -4.54957700 | -1.22088000 |
| H | 0.66325900 | -2.07051400 | 0.64405600  |
| C | 6.01826000 | -2.10798700 | -1.67600100 |
| H | 6.54407100 | -2.73078100 | -0.94258900 |
| H | 5.93581600 | -2.66115300 | -2.61849200 |
| H | 6.58773100 | -1.19223400 | -1.84245300 |
| N | 2.35405800 | 0.43299300  | 0.43381500  |
| C | 2.59617700 | 1.78969300  | 0.27182300  |
| O | 2.86772300 | 2.38528900  | -0.76039600 |
| O | 2.38878500 | 2.39419100  | 1.47030700  |
| C | 2.48449600 | 3.84871700  | 1.62590400  |
| C | 2.18078500 | 4.04505000  | 3.11375100  |
| H | 2.20069000 | 5.11035600  | 3.36862000  |
| H | 1.19167400 | 3.64613400  | 3.36294000  |
| H | 2.92167300 | 3.52735400  | 3.73231700  |
| C | 1.42427400 | 4.54543200  | 0.76526400  |
| H | 1.61534600 | 4.38782600  | -0.29759100 |
| H | 0.42611400 | 4.16030500  | 1.00597600  |
| H | 1.42954200 | 5.62268800  | 0.96916500  |
| C | 3.90298100 | 4.32900200  | 1.29960500  |
| H | 3.99863800 | 5.39405300  | 1.54160800  |
| H | 4.63735400 | 3.77824200  | 1.89836000  |
| H | 4.13785800 | 4.18659900  | 0.24342300  |

**a'-N-gau2-syn-S**

|   |            |             |             |
|---|------------|-------------|-------------|
| C | 3.37948900 | 0.02065900  | -1.05477900 |
| C | 3.88808000 | 1.23432900  | -0.27598200 |
| C | 2.98641600 | 2.20982100  | 0.26091900  |
| C | 5.24271500 | 1.42598200  | -0.09699400 |
| C | 1.57435700 | 2.12247900  | 0.16495100  |
| C | 3.57370800 | 3.33949100  | 0.92704800  |
| C | 5.70902900 | 2.56700900  | 0.59515600  |
| H | 5.95406500 | 0.71548500  | -0.50446700 |
| C | 0.76567300 | 3.10759300  | 0.71230200  |
| H | 1.09504100 | 1.27687700  | -0.31399000 |
| C | 2.71607100 | 4.34763600  | 1.44632200  |
| H | 6.78026100 | 2.70925200  | 0.73450700  |
| C | 1.35223100 | 4.24106300  | 1.34215100  |
| H | 3.17990400 | 5.19886200  | 1.93602200  |
| H | 0.69307300 | 5.00269500  | 1.74827400  |
| C | 2.93691600 | -1.10813300 | -0.09366400 |
| H | 2.28207100 | -0.65390000 | 0.65325300  |
| C | 4.08830100 | -1.89459600 | 0.58025800  |
| C | 1.31762600 | -2.94674400 | 0.26168600  |

|   |             |             |             |
|---|-------------|-------------|-------------|
| C | 2.75861100  | -3.03417900 | -1.73287500 |
| C | 3.77197800  | -3.40351000 | 0.54181400  |
| H | 5.03018800  | -1.70526200 | 0.05812200  |
| H | 4.20529100  | -1.55196300 | 1.61283400  |
| C | 2.37536100  | -3.64799200 | 1.14432400  |
| H | 0.67818200  | -2.26020800 | 0.81797900  |
| H | 0.68578100  | -3.64674200 | -0.28778700 |
| C | 3.77411400  | -3.87752600 | -0.92548000 |
| H | 3.24321600  | -2.40387300 | -2.47472600 |
| H | 1.99105100  | -3.63871100 | -2.22035400 |
| H | 4.52899000  | -3.95251500 | 1.11055900  |
| H | 2.16617600  | -4.72152600 | 1.19703900  |
| H | 4.77393700  | -3.76524700 | -1.35683100 |
| H | 3.51251600  | -4.93995300 | -0.97610800 |
| O | -0.58166500 | 3.05785000  | 0.68306300  |
| N | 4.91835700  | 3.50013400  | 1.08761800  |
| N | 2.02640300  | -2.11963100 | -0.78635400 |
| H | -0.90632900 | 2.14724100  | 0.41692200  |
| H | 2.50628700  | 0.32668900  | -1.64602900 |
| O | 4.37185100  | -0.49755800 | -1.93636100 |
| C | 4.52008300  | 0.25336800  | -3.13762400 |
| H | 4.83629800  | 1.28510900  | -2.93930800 |
| H | 5.29239600  | -0.24822600 | -3.72678000 |
| H | 3.58363000  | 0.27393500  | -3.71362600 |
| C | -1.97327400 | -0.18800200 | -2.48235500 |
| H | -1.71840000 | 0.82312700  | -2.76770400 |
| H | 1.29199500  | -1.57864300 | -1.30722800 |
| H | -2.76024600 | -0.69658300 | -3.02608000 |
| N | -0.85941700 | -0.97561200 | -2.26738800 |
| O | -0.91094300 | -2.22286200 | -2.32174900 |
| O | 0.19987300  | -0.37628200 | -1.88975200 |
| H | 2.33455500  | -3.25782100 | 2.16692400  |
| C | -4.74198300 | 3.32173000  | -1.63229800 |
| C | -5.93823300 | 2.63895100  | -1.87018400 |
| C | -6.03926700 | 1.25431900  | -1.67526500 |
| C | -4.90229400 | 0.57813900  | -1.24394500 |
| C | -3.68646900 | 1.25362400  | -1.02052900 |
| C | -3.60295300 | 2.62804600  | -1.20151300 |
| N | -4.75943800 | -0.78532300 | -0.94775200 |
| C | -3.48502700 | -1.06882300 | -0.47973300 |
| C | -2.69661400 | 0.25034000  | -0.54844100 |
| O | -3.08034700 | -2.16281600 | -0.12588800 |
| H | -4.69449000 | 4.39674600  | -1.77969000 |
| H | -6.81342600 | 3.18923100  | -2.20525900 |

|   |             |             |             |
|---|-------------|-------------|-------------|
| H | -6.97633200 | 0.73420300  | -1.84767600 |
| H | -2.67295300 | 3.15351900  | -1.00253000 |
| C | -5.79895800 | -1.78454500 | -1.08485400 |
| H | -6.65835400 | -1.54638700 | -0.44734600 |
| H | -6.13684700 | -1.85873000 | -2.12497700 |
| H | -5.37739300 | -2.74226600 | -0.77474900 |
| N | -1.67125600 | 0.54527100  | 0.24510600  |
| C | -1.33647500 | -0.18635500 | 1.36431400  |
| O | -0.18456000 | -0.44341100 | 1.70581600  |
| O | -2.42364700 | -0.43421600 | 2.13866600  |
| C | -2.33350700 | -1.15180100 | 3.41959500  |
| C | -3.80272400 | -1.26807800 | 3.83566700  |
| H | -3.88267000 | -1.76556800 | 4.80841900  |
| H | -4.26294500 | -0.27730100 | 3.91613600  |
| H | -4.36866800 | -1.85211400 | 3.10219700  |
| C | -1.55138900 | -0.30795500 | 4.43087700  |
| H | -0.51595300 | -0.17336200 | 4.11216300  |
| H | -2.01355800 | 0.67886500  | 4.54754000  |
| H | -1.55565200 | -0.80218400 | 5.40959600  |
| C | -1.72436500 | -2.54439600 | 3.22732100  |
| H | -1.87699900 | -3.13875800 | 4.13590900  |
| H | -2.21146500 | -3.05729000 | 2.39189200  |
| H | -0.65262800 | -2.48785100 | 3.02885100  |

**a'-O-gau2-syn-S**

|   |            |             |             |
|---|------------|-------------|-------------|
| C | 2.66908000 | -0.21398400 | -0.65830100 |
| C | 3.33868600 | 0.91240800  | 0.13181300  |
| C | 2.77338600 | 1.42186800  | 1.34549900  |
| C | 4.54760400 | 1.42619400  | -0.29103900 |
| C | 1.50595200 | 1.03547400  | 1.85485500  |
| C | 3.55079400 | 2.38898800  | 2.06953200  |
| C | 5.21519900 | 2.39683500  | 0.49006400  |
| H | 4.98874200 | 1.08603500  | -1.22180700 |
| C | 1.02037500 | 1.58793700  | 3.03042000  |
| H | 0.87617000 | 0.33655400  | 1.31541800  |
| C | 3.04139200 | 2.89624800  | 3.29640900  |
| H | 6.17164900 | 2.79308900  | 0.15046800  |
| C | 1.81419600 | 2.50689800  | 3.77010800  |
| H | 3.65091300 | 3.61595300  | 3.83467100  |
| H | 1.41101200 | 2.90791600  | 4.69530700  |
| C | 3.07859400 | -1.56551000 | -0.02615300 |
| H | 2.89518600 | -1.47606500 | 1.04719000  |
| C | 4.53973400 | -2.00627500 | -0.29182500 |
| C | 2.33801800 | -3.85455100 | 0.51847300  |

|   |             |             |             |
|---|-------------|-------------|-------------|
| C | 2.44445200  | -3.19487200 | -1.85392200 |
| C | 4.57678000  | -3.52365500 | -0.56260000 |
| H | 4.94035200  | -1.47072800 | -1.15645900 |
| H | 5.15762500  | -1.75148200 | 0.57409000  |
| C | 3.82975200  | -4.25827700 | 0.56731000  |
| H | 1.95470800  | -3.51637700 | 1.48324700  |
| H | 1.69350300  | -4.65871800 | 0.15715500  |
| C | 3.86439200  | -3.80550700 | -1.89971400 |
| H | 2.33424100  | -2.33231400 | -2.50536100 |
| H | 1.65917800  | -3.91559200 | -2.08798600 |
| H | 5.61491000  | -3.86602100 | -0.61122100 |
| H | 3.92398700  | -5.34254600 | 0.45021800  |
| H | 4.42767100  | -3.36376800 | -2.72784200 |
| H | 3.81387000  | -4.88542900 | -2.07837100 |
| O | -0.20095100 | 1.29865300  | 3.53215400  |
| N | 4.75706100  | 2.85676200  | 1.63781300  |
| N | 2.16785300  | -2.71058200 | -0.45067800 |
| H | -0.75020300 | 0.86348100  | 2.83695600  |
| H | 1.57770800  | -0.11407500 | -0.59778500 |
| O | 3.05572000  | -0.21658900 | -2.02432700 |
| C | 2.31828100  | 0.71628800  | -2.81991000 |
| H | 2.52685800  | 1.75108100  | -2.51865900 |
| H | 2.65298100  | 0.57310400  | -3.85097400 |
| H | 1.24143500  | 0.52621600  | -2.74605600 |
| C | -2.47472000 | -1.88553700 | -0.99365800 |
| H | -2.86558600 | -1.90240500 | -2.00406600 |
| H | 1.16385000  | -2.40422100 | -0.38033500 |
| H | -2.89371200 | -2.59811400 | -0.29414000 |
| N | -1.08094400 | -1.96453800 | -0.99012800 |
| O | -0.49840900 | -2.21898400 | 0.11513300  |
| O | -0.41891300 | -1.78487800 | -2.03101500 |
| H | 4.26428600  | -3.99639600 | 1.53782400  |
| C | -6.92067000 | -1.58927200 | -0.45619100 |
| C | -6.97424400 | -2.02079700 | 0.87177000  |
| C | -5.89048000 | -1.83542400 | 1.74307500  |
| C | -4.75793100 | -1.21219300 | 1.23159200  |
| C | -4.68794800 | -0.78350200 | -0.10324100 |
| C | -5.76828000 | -0.96313100 | -0.95338300 |
| N | -3.56219300 | -0.88475500 | 1.89859500  |
| C | -2.70909900 | -0.18157100 | 1.07617200  |
| C | -3.34764100 | -0.15692400 | -0.32765600 |
| O | -1.66678300 | 0.35997500  | 1.43062900  |
| H | -7.77859300 | -1.73583100 | -1.10616300 |
| H | -7.87430300 | -2.50175200 | 1.24536900  |

|   |             |             |             |
|---|-------------|-------------|-------------|
| H | -5.94547100 | -2.15851400 | 2.77788500  |
| H | -5.71762600 | -0.61076800 | -1.97966300 |
| C | -3.31631400 | -1.13764300 | 3.30484600  |
| H | -4.00918000 | -0.56697400 | 3.93421700  |
| H | -3.43051900 | -2.20460900 | 3.52404400  |
| H | -2.29445500 | -0.83554500 | 3.53640500  |
| N | -3.27395800 | 0.87878800  | -1.15599100 |
| C | -2.11476700 | 1.55796500  | -1.40067800 |
| O | -0.97764600 | 1.09901900  | -1.48817000 |
| O | -2.43025700 | 2.86181300  | -1.66032700 |
| C | -1.41667500 | 3.84495100  | -2.03536700 |
| C | -2.23691600 | 5.12942100  | -2.19400800 |
| H | -1.58609300 | 5.96706600  | -2.46886300 |
| H | -2.99769500 | 5.01256100  | -2.97379600 |
| H | -2.74552300 | 5.38126500  | -1.25702100 |
| C | -0.76444800 | 3.46493200  | -3.37014400 |
| H | -0.18330200 | 2.54615100  | -3.27614800 |
| H | -1.53050800 | 3.31572800  | -4.13998800 |
| H | -0.10002500 | 4.27054400  | -3.70523500 |
| C | -0.38632800 | 4.01129700  | -0.91257000 |
| H | 0.29935900  | 4.83248400  | -1.15282600 |
| H | -0.88843500 | 4.25462400  | 0.03085800  |
| H | 0.19298000  | 3.09811300  | -0.76991400 |

**a'-O-anti-S**

|   |             |             |             |
|---|-------------|-------------|-------------|
| C | -3.02064400 | -0.05463300 | -0.99319200 |
| C | -3.75277800 | -1.14712500 | -0.21473100 |
| C | -3.11156300 | -1.89184000 | 0.82829900  |
| C | -5.07964000 | -1.40935500 | -0.49059300 |
| C | -1.74259800 | -1.75626200 | 1.19173400  |
| C | -3.92965000 | -2.83616000 | 1.53936300  |
| C | -5.78256900 | -2.37271800 | 0.26601100  |
| H | -5.58370800 | -0.88008800 | -1.29211500 |
| C | -1.20795300 | -2.52025000 | 2.21921200  |
| H | -1.09011900 | -1.06940600 | 0.66128400  |
| C | -3.34965600 | -3.58869200 | 2.59723500  |
| H | -6.83017800 | -2.57245900 | 0.04413400  |
| C | -2.03061100 | -3.43581600 | 2.93366100  |
| H | -3.98914300 | -4.29238900 | 3.12158200  |
| H | -1.57830300 | -4.01328800 | 3.73419700  |
| C | -3.09781500 | 1.27706000  | -0.20662200 |
| H | -2.82269700 | 1.04274200  | 0.82452300  |
| C | -4.46230300 | 2.00914200  | -0.24844200 |
| C | -1.85946200 | 3.31705800  | 0.42289400  |



|   |             |             |             |
|---|-------------|-------------|-------------|
| C | -2.34977900 | 2.94142600  | -1.95992700 |
| C | -4.22404900 | 3.52701600  | -0.39310700 |
| H | -5.05627300 | 1.65017000  | -1.09323200 |
| H | -5.01970500 | 1.79002900  | 0.66705300  |
| C | -3.22549400 | 3.99349300  | 0.68453100  |
| H | -1.46051000 | 2.81036100  | 1.30440900  |
| H | -1.09880500 | 4.00734300  | 0.05413900  |
| C | -3.62110800 | 3.80430900  | -1.78437500 |
| H | -2.48605200 | 2.14726400  | -2.69106000 |
| H | -1.46310500 | 3.52162000  | -2.22174100 |
| H | -5.17271300 | 4.06093700  | -0.28216500 |
| H | -3.11168800 | 5.08189800  | 0.65667600  |
| H | -4.34527200 | 3.55728100  | -2.56695700 |
| H | -3.38023700 | 4.86790400  | -1.88545700 |
| O | 0.08002800  | -2.45918400 | 2.61790800  |
| N | -5.24357700 | -3.05908800 | 1.25413400  |
| N | -2.02927200 | 2.26973800  | -0.64703700 |
| H | 0.63672000  | -1.89677000 | 2.02535000  |
| H | -1.96412700 | -0.33075100 | -1.09967800 |
| O | -3.57413600 | 0.15094500  | -2.28725000 |
| C | -3.16406900 | -0.82427500 | -3.24381500 |
| H | -3.48301300 | -1.83468600 | -2.95869700 |
| H | -3.64073500 | -0.55281200 | -4.18912600 |
| H | -2.07259300 | -0.81797700 | -3.37401900 |
| C | 2.38996100  | 0.76185700  | -1.52940300 |
| H | 2.24196600  | -0.27119700 | -1.81197600 |
| H | -1.11466600 | 1.75180400  | -0.74914200 |
| H | 3.05682600  | 1.36597000  | -2.13254100 |
| N | 1.18848800  | 1.41561700  | -1.28045600 |
| O | 1.10153400  | 2.66363100  | -1.31861200 |
| O | 0.18530400  | 0.70775800  | -0.90984800 |
| H | -3.59665200 | 3.73077500  | 1.68073100  |
| C | 4.83874300  | 4.03404300  | 0.62489400  |
| C | 3.97868300  | 4.36168100  | 1.67637200  |
| C | 3.02873200  | 3.44598300  | 2.15154000  |
| C | 2.97050400  | 2.20447600  | 1.52836800  |
| C | 3.81695000  | 1.86935000  | 0.46386400  |
| C | 4.76388100  | 2.77526800  | 0.01218400  |
| N | 2.14342400  | 1.10437300  | 1.84359300  |
| C | 2.42342400  | 0.02202300  | 1.04449200  |
| C | 3.50957200  | 0.46747100  | 0.03265900  |
| O | 1.91135100  | -1.08999200 | 1.14041800  |
| H | 5.57434200  | 4.75702800  | 0.28399900  |
| H | 4.04895100  | 5.33994700  | 2.14443600  |

|   |            |             |             |
|---|------------|-------------|-------------|
| H | 2.37554400 | 3.70083900  | 2.98018100  |
| H | 5.43804800 | 2.50154000  | -0.79438800 |
| C | 1.21807400 | 1.08164900  | 2.95921100  |
| H | 1.73436200 | 1.35327000  | 3.88646400  |
| H | 0.39108400 | 1.78239700  | 2.79595000  |
| H | 0.81791300 | 0.07310500  | 3.06173800  |
| N | 4.54632100 | -0.31054100 | -0.30494200 |
| C | 4.49250700 | -1.65593100 | -0.54126000 |
| O | 5.38766700 | -2.42648400 | -0.21665600 |
| O | 3.40603000 | -2.04653300 | -1.28746800 |
| C | 3.17667800 | -3.45139400 | -1.64037300 |
| C | 1.83884400 | -3.40132600 | -2.38545800 |
| H | 1.54178200 | -4.40770600 | -2.70164500 |
| H | 1.05134800 | -2.99614100 | -1.74066700 |
| H | 1.91320700 | -2.77127200 | -3.27926900 |
| C | 3.04716000 | -4.31093600 | -0.37760800 |
| H | 3.99457300 | -4.36346100 | 0.16105400  |
| H | 2.28745000 | -3.89321300 | 0.29110800  |
| H | 2.74242600 | -5.32811000 | -0.65157300 |
| C | 4.28765100 | -3.95363600 | -2.56920700 |
| H | 4.04682600 | -4.96117100 | -2.92927500 |
| H | 4.38344900 | -3.29625300 | -3.44156700 |
| H | 5.24582200 | -3.98463600 | -2.04817200 |

**b'-N-gaul-syn-S**

|   |             |             |             |
|---|-------------|-------------|-------------|
| C | -2.08131000 | 1.33431500  | -0.28158300 |
| C | -3.53037300 | 0.86675200  | -0.45416200 |
| C | -3.86842700 | -0.51369200 | -0.63147500 |
| C | -4.55840700 | 1.78698400  | -0.38695800 |
| C | -2.91414300 | -1.54559800 | -0.81459200 |
| C | -5.26811900 | -0.84310500 | -0.64530000 |
| C | -5.90172900 | 1.35218000  | -0.43561400 |
| H | -4.34054100 | 2.84561800  | -0.29454700 |
| C | -3.31784300 | -2.85972700 | -1.01131000 |
| H | -1.85740200 | -1.32222400 | -0.90528300 |
| C | -5.64557200 | -2.20603000 | -0.79902600 |
| H | -6.70559100 | 2.08507400  | -0.37343100 |
| C | -4.70421800 | -3.18806900 | -0.97236200 |
| H | -6.70700300 | -2.43629600 | -0.79405800 |
| H | -4.99054200 | -4.22644700 | -1.11171300 |
| C | -1.70996800 | 1.25904400  | 1.21857400  |
| H | -1.89013700 | 0.22476700  | 1.52186100  |
| C | -2.47724400 | 2.23016000  | 2.15003000  |
| C | 0.11937700  | 0.88865200  | 2.84253000  |

|   |             |             |             |
|---|-------------|-------------|-------------|
| C | 0.17498600  | 2.92933700  | 1.46885500  |
| C | -1.54417500 | 2.70863000  | 3.28017400  |
| H | -2.83407200 | 3.09418200  | 1.58225100  |
| H | -3.35371200 | 1.71764400  | 2.55567600  |
| C | -0.83245200 | 1.49128300  | 3.89879200  |
| H | 0.03882400  | -0.19542600 | 2.76457800  |
| H | 1.16630800  | 1.14145600  | 3.02391100  |
| C | -0.48112000 | 3.64214700  | 2.67060700  |
| H | -0.16446600 | 3.32135100  | 0.51348000  |
| H | 1.26379000  | 2.94672200  | 1.49356700  |
| H | -2.12226900 | 3.23884300  | 4.04279400  |
| H | -0.25873000 | 1.78595600  | 4.78323100  |
| H | -0.94117200 | 4.57649100  | 2.33353300  |
| H | 0.27085000  | 3.90138600  | 3.42420600  |
| O | -2.46535500 | -3.86855500 | -1.24994800 |
| N | -6.25889600 | 0.08625800  | -0.53783300 |
| N | -0.21874900 | 1.46655700  | 1.48516800  |
| H | -1.52161200 | -3.54842900 | -1.34743000 |
| H | -1.40221600 | 0.67037400  | -0.83386100 |
| O | -1.89610600 | 2.67015300  | -0.73421400 |
| C | -1.78296400 | 2.77193800  | -2.15348400 |
| H | -2.68717500 | 2.40950100  | -2.65855400 |
| H | -1.64837800 | 3.83260200  | -2.38021800 |
| H | -0.91664900 | 2.20630600  | -2.52308500 |
| C | 2.03014300  | -2.23987700 | -2.04792300 |
| H | 2.57126500  | -3.17214300 | -1.96370900 |
| H | 0.37270100  | 0.96167100  | 0.77430900  |
| H | 2.38573200  | -1.41060000 | -2.64064400 |
| N | 0.68102500  | -2.33578900 | -1.92869900 |
| O | -0.04856400 | -1.34051500 | -2.19356200 |
| O | 0.17640800  | -3.41851400 | -1.46110600 |
| H | -1.56847900 | 0.74652200  | 4.22033300  |
| C | 0.44772200  | -3.41951800 | 2.20166900  |
| C | 1.55172200  | -4.19820200 | 2.55427000  |
| C | 2.83174600  | -3.92130100 | 2.05011600  |
| C | 2.96820100  | -2.83213500 | 1.19927400  |
| C | 1.86801400  | -2.01591800 | 0.85681700  |
| C | 0.60018700  | -2.32674800 | 1.33657100  |
| N | 4.12501000  | -2.36947600 | 0.56046500  |
| C | 3.85973100  | -1.24028100 | -0.19742900 |
| C | 2.35990700  | -0.96551000 | -0.04554200 |
| O | 4.68828500  | -0.56900100 | -0.79114500 |
| H | -0.53764300 | -3.67329700 | 2.58117600  |
| H | 1.42062800  | -5.04508500 | 3.22238000  |

|   |             |             |             |
|---|-------------|-------------|-------------|
| H | 3.68122200  | -4.54252500 | 2.31541800  |
| H | -0.26106900 | -1.74235700 | 1.03054100  |
| C | 5.44205200  | -2.96101200 | 0.68058600  |
| H | 5.44101500  | -3.99384000 | 0.31393600  |
| H | 6.12815100  | -2.36492400 | 0.07667900  |
| H | 5.78008600  | -2.95316400 | 1.72313400  |
| N | 1.80554000  | 0.20940700  | -0.22862800 |
| C | 2.37757200  | 1.11093000  | -1.14152900 |
| O | 2.48868500  | 0.92673000  | -2.33833300 |
| O | 2.66074100  | 2.27482000  | -0.50818600 |
| C | 3.28557200  | 3.40359800  | -1.23320600 |
| C | 3.47946200  | 4.44909300  | -0.13209700 |
| H | 3.98440300  | 5.33171100  | -0.53886300 |
| H | 2.51823700  | 4.77100000  | 0.28338800  |
| H | 4.09327800  | 4.04781500  | 0.68151000  |
| C | 2.33971800  | 3.93016500  | -2.31617500 |
| H | 2.18805300  | 3.19115800  | -3.10430800 |
| H | 1.36584500  | 4.19266700  | -1.88626900 |
| H | 2.76367100  | 4.83681900  | -2.76341900 |
| C | 4.64080700  | 2.97469100  | -1.80249200 |
| H | 5.15145100  | 3.84899700  | -2.22225000 |
| H | 5.27300700  | 2.55484700  | -1.01320600 |
| H | 4.52696400  | 2.22657300  | -2.58803100 |

**b'-N-gau2-syn-S**

|   |             |             |             |
|---|-------------|-------------|-------------|
| C | -2.93853300 | 0.47100000  | -0.49399100 |
| C | -3.94999600 | -0.59157100 | -0.06211400 |
| C | -3.52383200 | -1.83453500 | 0.50638900  |
| C | -5.30471400 | -0.35003500 | -0.16156800 |
| C | -2.16688600 | -2.23187200 | 0.60483000  |
| C | -4.54800600 | -2.71719200 | 0.99032300  |
| C | -6.22887100 | -1.30212500 | 0.32804600  |
| H | -5.66466600 | 0.56714500  | -0.61546000 |
| C | -1.82660200 | -3.46025800 | 1.15318900  |
| H | -1.37232600 | -1.60952900 | 0.20841100  |
| C | -4.16079700 | -3.94884300 | 1.58710600  |
| H | -7.29694200 | -1.10166600 | 0.24991300  |
| C | -2.84033500 | -4.31252300 | 1.67323700  |
| H | -4.94884900 | -4.59853100 | 1.95652100  |
| H | -2.54231400 | -5.26177100 | 2.10861800  |
| C | -2.52299300 | 1.28647900  | 0.75492400  |
| H | -2.31841400 | 0.56342500  | 1.54683800  |
| C | -3.56208100 | 2.34143200  | 1.22517100  |

|   |             |             |             |
|---|-------------|-------------|-------------|
| C | -0.76415800 | 2.60763200  | 1.89060000  |
| C | -1.23527200 | 3.08934600  | -0.47928000 |
| C | -2.91391700 | 3.73891300  | 1.27448500  |
| H | -4.40806900 | 2.35817000  | 0.53533900  |
| H | -3.94519000 | 2.06612100  | 2.21282000  |
| C | -1.75346200 | 3.72745200  | 2.28467800  |
| H | -0.73960500 | 1.79411200  | 2.61614500  |
| H | 0.25652300  | 2.96711800  | 1.74814300  |
| C | -2.35943000 | 4.08449000  | -0.12003600 |
| H | -1.38518300 | 2.60244100  | -1.43838400 |
| H | -0.24362200 | 3.54694400  | -0.46916100 |
| H | -3.66329600 | 4.47837000  | 1.57277100  |
| H | -1.24643900 | 4.69800900  | 2.28903900  |
| H | -3.15846400 | 4.02057200  | -0.86363000 |
| H | -1.96947700 | 5.10766700  | -0.13245300 |
| O | -0.55471800 | -3.90389100 | 1.21880000  |
| N | -5.87970800 | -2.43774700 | 0.90046400  |
| N | -1.18728200 | 2.00024600  | 0.57087700  |
| H | 0.00671300  | -3.36143900 | 0.60270000  |
| H | -2.04249700 | -0.00691700 | -0.91034900 |
| O | -3.47451400 | 1.36328600  | -1.46118900 |
| C | -3.46194000 | 0.82924600  | -2.78597000 |
| H | -4.08384500 | -0.07202000 | -2.86389200 |
| H | -3.87714700 | 1.60345300  | -3.43680500 |
| H | -2.43931300 | 0.59141900  | -3.10309800 |
| C | 2.70294000  | -2.10073000 | 0.12023700  |
| H | 2.30728800  | -2.45972600 | 1.06035700  |
| H | -0.44508700 | 1.30566000  | 0.30359000  |
| H | 3.75508100  | -2.23487200 | -0.09292000 |
| N | 1.88390900  | -2.32851200 | -0.96580000 |
| O | 2.32772600  | -2.21937000 | -2.12457700 |
| O | 0.64217200  | -2.52220100 | -0.76061300 |
| H | -2.12798200 | 3.55129600  | 3.29816100  |
| C | 1.83253000  | 0.00734800  | 4.12012600  |
| C | 3.16921200  | 0.22106500  | 4.47000800  |
| C | 4.16062600  | 0.38304700  | 3.49248300  |
| C | 3.76878500  | 0.33061600  | 2.15746300  |
| C | 2.42433400  | 0.13175900  | 1.79119900  |
| C | 1.45464000  | -0.03948300 | 2.77122700  |
| N | 4.55943500  | 0.43639400  | 1.01267800  |
| C | 3.80750300  | 0.29777000  | -0.15639000 |
| C | 2.34160700  | 0.14244000  | 0.31211700  |
| O | 4.29107200  | 0.28008600  | -1.27303500 |
| H | 1.08609400  | -0.13487400 | 4.89637300  |

|   |            |             |             |
|---|------------|-------------|-------------|
| H | 3.45153100 | 0.25421300  | 5.51890300  |
| H | 5.19795600 | 0.53847000  | 3.77175200  |
| H | 0.42543600 | -0.24251900 | 2.49016900  |
| C | 6.00430000 | 0.53881800  | 1.00862100  |
| H | 6.33136100 | 1.45989300  | 1.50450700  |
| H | 6.46139800 | -0.31949300 | 1.51562600  |
| H | 6.32868300 | 0.55543300  | -0.03286300 |
| N | 1.21049900 | 0.49375100  | -0.28568500 |
| C | 1.07920400 | 0.90939300  | -1.60673100 |
| O | 0.04537500 | 0.70089600  | -2.23732800 |
| O | 2.07605200 | 1.70531900  | -2.03336100 |
| C | 2.25118700 | 2.05047400  | -3.45937100 |
| C | 3.58643500 | 2.79828000  | -3.45834800 |
| H | 3.84775700 | 3.10266800  | -4.47794900 |
| H | 3.52671800 | 3.70012100  | -2.83790700 |
| H | 4.38036200 | 2.15910600  | -3.06335300 |
| C | 1.12039700 | 2.96897100  | -3.93164700 |
| H | 0.16226800 | 2.44703300  | -3.93702800 |
| H | 1.04223200 | 3.85160300  | -3.28542100 |
| H | 1.33427600 | 3.31869000  | -4.94858900 |
| C | 2.34688000 | 0.76784000  | -4.28824900 |
| H | 2.63446800 | 1.01479900  | -5.31687300 |
| H | 3.10142200 | 0.10200400  | -3.86038500 |
| H | 1.39226100 | 0.23802800  | -4.31499300 |

**b'-O-anti-S**

|   |             |             |             |
|---|-------------|-------------|-------------|
| C | -2.31863400 | -1.27146800 | 0.91747000  |
| C | -3.78903300 | -0.87589500 | 0.76191300  |
| C | -4.18036200 | 0.28083600  | 0.01327000  |
| C | -4.77869000 | -1.63386700 | 1.35357100  |
| C | -3.26486800 | 1.14853700  | -0.63274700 |
| C | -5.58609700 | 0.55934800  | -0.07440900 |
| C | -6.13570900 | -1.26592200 | 1.20251700  |
| H | -4.51886300 | -2.50425600 | 1.94631400  |
| C | -3.71107600 | 2.24844400  | -1.34934600 |
| H | -2.20022200 | 0.95318600  | -0.61188400 |
| C | -6.01060500 | 1.69899600  | -0.81234400 |
| H | -6.91041600 | -1.87140900 | 1.67180200  |
| C | -5.10550400 | 2.52198800  | -1.43433900 |
| H | -7.07792000 | 1.89318300  | -0.86557500 |
| H | -5.42752500 | 3.39112700  | -2.00026900 |
| C | -1.82300200 | -2.03326000 | -0.33455000 |
| H | -2.12415500 | -1.44537600 | -1.20354000 |
| C | -2.32911800 | -3.49264600 | -0.45846900 |

|   |             |             |             |
|---|-------------|-------------|-------------|
| C | 0.09946900  | -2.45456300 | -1.83868300 |
| C | 0.33896100  | -3.01928500 | 0.55012300  |
| C | -1.17271400 | -4.40850700 | -0.90528400 |
| H | -2.71697900 | -3.83674900 | 0.50394300  |
| H | -3.15080600 | -3.52876100 | -1.18020600 |
| C | -0.52775600 | -3.82591600 | -2.17694300 |
| H | -0.23801700 | -1.64975700 | -2.49059700 |
| H | 1.18928400  | -2.46291900 | -1.84123400 |
| C | -0.11484000 | -4.45803200 | 0.21402900  |
| H | 0.02351200  | -2.70519800 | 1.54140400  |
| H | 1.41207200  | -2.86210300 | 0.44819700  |
| H | -1.55536600 | -5.41449900 | -1.10350500 |
| H | 0.24434500  | -4.50207200 | -2.55841700 |
| H | -0.53442600 | -4.93120500 | 1.10759600  |
| H | 0.74027800  | -5.06341400 | -0.10595100 |
| O | -2.88561600 | 3.10085100  | -1.98981000 |
| N | -6.54016000 | -0.21471300 | 0.51662800  |
| N | -0.29856300 | -2.06338000 | -0.43170800 |
| H | -1.93687900 | 2.83334900  | -1.89529800 |
| H | -1.70856600 | -0.36551000 | 1.01819000  |
| O | -2.11637600 | -2.09565300 | 2.05996100  |
| C | -2.01060200 | -1.36710400 | 3.28017400  |
| H | -2.89520700 | -0.74297600 | 3.46105300  |
| H | -1.93150200 | -2.10818600 | 4.08015800  |
| H | -1.11323800 | -0.73388600 | 3.28560600  |
| C | 1.78625500  | 1.51413500  | -1.76227600 |
| H | 2.11354700  | 0.50744800  | -1.98342900 |
| H | 0.08442000  | -1.11932000 | -0.24218400 |
| H | 2.30026500  | 2.35967200  | -2.19814500 |
| N | 0.40930900  | 1.64436000  | -1.78777600 |
| O | -0.11240400 | 2.79560400  | -1.84994600 |
| O | -0.31106500 | 0.61345000  | -1.66630400 |
| H | -1.28214500 | -3.71740300 | -2.96375400 |
| C | 3.69445100  | 5.23040800  | 0.24884800  |
| C | 2.53718200  | 5.72245100  | 0.86152300  |
| C | 1.48788600  | 4.87011000  | 1.23269700  |
| C | 1.63876100  | 3.51562200  | 0.95846000  |
| C | 2.78327400  | 3.01431700  | 0.32333900  |
| C | 3.82508200  | 3.86309800  | -0.02420800 |
| N | 0.77019600  | 2.45235800  | 1.27104400  |
| C | 1.29608100  | 1.24064900  | 0.88774300  |
| C | 2.62484300  | 1.54602700  | 0.16475500  |
| O | 0.77196400  | 0.14720300  | 1.10234700  |
| H | 4.49644300  | 5.91354100  | -0.01553300 |

|   |             |             |             |
|---|-------------|-------------|-------------|
| H | 2.44768400  | 6.78634100  | 1.06349800  |
| H | 0.59843600  | 5.25969700  | 1.71704800  |
| H | 4.71918500  | 3.46183300  | -0.49259100 |
| C | -0.49951500 | 2.62009100  | 1.95141900  |
| H | -0.35619700 | 3.17531300  | 2.88474800  |
| H | -1.21196100 | 3.15976000  | 1.31857500  |
| H | -0.89839900 | 1.63264300  | 2.18361600  |
| N | 3.71250100  | 0.78142500  | 0.15666500  |
| C | 3.72077600  | -0.55478600 | -0.07960900 |
| O | 2.91005000  | -1.22219800 | -0.73874000 |
| O | 4.86284700  | -1.07970600 | 0.44389600  |
| C | 5.36557300  | -2.40628400 | 0.08582400  |
| C | 6.68857100  | -2.47618600 | 0.85576500  |
| H | 7.19667500  | -3.42655200 | 0.65841200  |
| H | 7.35362100  | -1.65919600 | 0.55669100  |
| H | 6.51411800  | -2.39584100 | 1.93437300  |
| C | 5.61856200  | -2.48367700 | -1.42385600 |
| H | 4.68511500  | -2.39121400 | -1.98317400 |
| H | 6.29741100  | -1.68343800 | -1.73968800 |
| H | 6.08396900  | -3.44335400 | -1.67764400 |
| C | 4.41773900  | -3.51118400 | 0.56601600  |
| H | 4.91651500  | -4.48500100 | 0.49431100  |
| H | 4.14247900  | -3.34914500 | 1.61437100  |
| H | 3.50918000  | -3.54394700 | -0.03685700 |

#### ***4. STEP3 (protonation of product) for model catalyst***

##### **Si-IM3-model**

|   |             |            |             |
|---|-------------|------------|-------------|
| C | 3.45928400  | 0.10157700 | -0.84285900 |
| C | 3.40001800  | 1.52396600 | -0.28921800 |
| C | 2.39795200  | 1.92362700 | 0.65364400  |
| C | 4.33363600  | 2.46493900 | -0.67178600 |
| C | 1.36491700  | 1.06586600 | 1.11648800  |
| C | 2.44232700  | 3.27468500 | 1.13294100  |
| C | 4.29144000  | 3.76938200 | -0.12830500 |
| H | 5.09654300  | 2.20574200 | -1.39784400 |
| C | 0.41254900  | 1.52987600 | 2.00319100  |
| H | 1.30125600  | 0.04231600 | 0.76346100  |
| C | 1.45175100  | 3.70990000 | 2.05536400  |
| H | 5.03919800  | 4.50083500 | -0.43400600 |
| C | 0.45843400  | 2.86355000 | 2.48374800  |
| H | 1.50834100  | 4.73543200 | 2.40788300  |
| H | -0.30207900 | 3.19163300 | 3.18590000  |



|   |             |             |             |
|---|-------------|-------------|-------------|
| C | 4.16035400  | -0.85467500 | 0.15486200  |
| H | 3.73615600  | -0.60594100 | 1.13374500  |
| C | 5.71026100  | -0.69801000 | 0.22730100  |
| C | 4.13378400  | -3.02644900 | 1.15311300  |
| C | 4.51847300  | -2.86583600 | -1.20481200 |
| C | 6.32686400  | -2.10763100 | 0.35672200  |
| H | 6.09664800  | -0.21430700 | -0.67602900 |
| H | 5.99280000  | -0.07113200 | 1.08146300  |
| C | 5.64230700  | -2.85786600 | 1.51757900  |
| H | 3.48879100  | -2.68140300 | 1.96963800  |
| H | 3.88898700  | -4.07900300 | 0.96954200  |
| C | 6.05753800  | -2.87724800 | -0.95131300 |
| H | 4.27589900  | -2.29100900 | -2.09901300 |
| H | 4.13402300  | -3.88260300 | -1.34715600 |
| H | 7.40517700  | -2.02885800 | 0.53767800  |
| H | 6.11895900  | -3.83377100 | 1.67322300  |
| H | 6.59173500  | -2.40420500 | -1.78461800 |
| H | 6.43800200  | -3.90364600 | -0.86696900 |
| O | -0.61186800 | 0.75049800  | 2.45884900  |
| N | 3.38957000  | 4.17704400  | 0.74268100  |
| N | 3.78231100  | -2.27310800 | -0.06694500 |
| H | -2.27991600 | 0.50284200  | 1.05437700  |
| H | 2.43865700  | -0.27692900 | -0.98580100 |
| O | 4.13644300  | 0.06434500  | -2.09764300 |
| C | 3.31880600  | 0.45813000  | -3.19059600 |
| H | 2.98909300  | 1.50306800  | -3.10478200 |
| H | 3.92533400  | 0.35201200  | -4.09471700 |
| H | 2.42909100  | -0.18242800 | -3.27584000 |
| C | -2.29092200 | -1.21832600 | -1.59784000 |
| H | -2.84050400 | -0.57386000 | -2.28294900 |
| H | -2.28950300 | -2.25325300 | -1.93353100 |
| N | -0.86199100 | -0.75936800 | -1.63251700 |
| O | -0.65476900 | 0.44935700  | -1.54884800 |
| O | 0.00978600  | -1.61959400 | -1.74548500 |
| H | 5.76010100  | -2.29260800 | 2.45116700  |
| C | -6.51037100 | -2.49984700 | -0.77540500 |
| C | -6.35503900 | -3.67481800 | -0.03871900 |
| C | -5.15341000 | -3.96002500 | 0.62348500  |
| C | -4.12873000 | -3.02890300 | 0.51511600  |
| C | -4.26791400 | -1.84242400 | -0.22048000 |
| C | -5.46047400 | -1.57492500 | -0.87976400 |
| N | -2.84515300 | -3.09046800 | 1.09937700  |
| C | -2.12288900 | -1.97384800 | 0.82129700  |
| C | -2.93529000 | -1.09752700 | -0.17872300 |

|   |             |             |             |
|---|-------------|-------------|-------------|
| O | -1.01115400 | -1.70266600 | 1.27112300  |
| H | -7.45137600 | -2.29806800 | -1.27863600 |
| H | -7.17575100 | -4.38358600 | 0.02773300  |
| H | -5.03332200 | -4.87318000 | 1.19706000  |
| H | -5.57454300 | -0.66097700 | -1.45060300 |
| C | -2.37626900 | -4.15790900 | 1.96707400  |
| H | -3.00671900 | -4.23024500 | 2.85943900  |
| H | -2.39447000 | -5.11295900 | 1.43265100  |
| H | -1.35282500 | -3.92588000 | 2.26310500  |
| N | -2.96127300 | 0.25842000  | 0.33946100  |
| C | -3.47990800 | 1.31225900  | -0.37430800 |
| O | -4.13344700 | 1.18945600  | -1.40322100 |
| O | -3.17442000 | 2.46038900  | 0.24873000  |
| C | -3.58269800 | 3.77441100  | -0.29717000 |
| C | -2.98612800 | 4.75004600  | 0.71834600  |
| H | -3.22682900 | 5.77949900  | 0.43265300  |
| H | -3.39219700 | 4.56659100  | 1.71890800  |
| H | -1.89703600 | 4.64885700  | 0.76342200  |
| C | -5.10981000 | 3.87687500  | -0.31655800 |
| H | -5.54872900 | 3.17723900  | -1.03049600 |
| H | -5.52089300 | 3.67174000  | 0.67834100  |
| H | -5.40366000 | 4.89372800  | -0.60052700 |
| C | -2.96038500 | 3.98185900  | -1.67996100 |
| H | -3.14340900 | 5.01053200  | -2.01016200 |
| H | -1.87694700 | 3.82519700  | -1.63905600 |
| H | -3.38634900 | 3.29953000  | -2.41781300 |
| H | -0.52931300 | -0.15693000 | 2.09199000  |

**Si-product**

|   |             |             |             |
|---|-------------|-------------|-------------|
| H | -0.66367700 | 0.88237000  | 1.32878700  |
| C | 0.63646500  | 1.07470600  | -1.44944500 |
| H | -0.05023400 | 0.51230900  | -2.08202600 |
| H | 1.60737300  | 1.19626100  | -1.92567700 |
| N | 0.05654000  | 2.45383500  | -1.31169300 |
| O | -1.13494300 | 2.53764600  | -1.01645800 |
| O | 0.80281800  | 3.40878800  | -1.51017600 |
| C | 2.40084600  | -3.04591800 | -1.06316000 |
| C | 3.63375500  | -2.82520300 | -0.44763200 |
| C | 3.89164000  | -1.64037300 | 0.25519700  |
| C | 2.87256000  | -0.69765400 | 0.31984200  |
| C | 1.62586200  | -0.90522900 | -0.29458000 |
| C | 1.38572000  | -2.07939000 | -0.99490900 |
| N | 2.89487500  | 0.54840600  | 0.97504600  |
| C | 1.68649000  | 1.18284700  | 0.86954600  |

|   |             |             |             |
|---|-------------|-------------|-------------|
| C | 0.77902300  | 0.34279100  | -0.08050300 |
| O | 1.34158700  | 2.21147400  | 1.42733000  |
| H | 2.22200600  | -3.97304200 | -1.59980300 |
| H | 4.41131500  | -3.58167900 | -0.50995900 |
| H | 4.85043800  | -1.47255800 | 0.73485400  |
| H | 0.42284300  | -2.24403000 | -1.46452000 |
| C | 3.98932500  | 1.04398100  | 1.78949800  |
| H | 4.19146100  | 0.36029300  | 2.62154100  |
| H | 4.89622100  | 1.15467000  | 1.18602300  |
| H | 3.69627100  | 2.01745100  | 2.18493000  |
| N | -0.47749600 | 0.17168900  | 0.62861300  |
| C | -1.58952500 | -0.39642500 | 0.05231300  |
| O | -1.57405600 | -1.03487400 | -0.99189600 |
| O | -2.65610500 | -0.16140200 | 0.83471100  |
| C | -4.00629700 | -0.64687000 | 0.47757000  |
| C | -4.85975000 | -0.11433000 | 1.63004100  |
| H | -5.90358500 | -0.41605000 | 1.49401800  |
| H | -4.50919200 | -0.50842100 | 2.58998700  |
| H | -4.81943800 | 0.97933600  | 1.67066700  |
| C | -4.01722900 | -2.17716400 | 0.45191900  |
| H | -3.39750400 | -2.56664900 | -0.35812300 |
| H | -3.65013400 | -2.57991500 | 1.40267000  |
| H | -5.04339300 | -2.53373600 | 0.30720900  |
| C | -4.44710200 | -0.03306400 | -0.85351700 |
| H | -5.49744700 | -0.28351500 | -1.04127400 |
| H | -4.35898400 | 1.05837200  | -0.81983100 |
| H | -3.84687500 | -0.40825900 | -1.68439400 |

**Re-product**

|   |             |             |             |
|---|-------------|-------------|-------------|
| C | -0.63615900 | 1.07420300  | -1.44951400 |
| H | -1.60701500 | 1.19584900  | -1.92582100 |
| H | 0.05040900  | 0.51142300  | -2.08190000 |
| N | -0.05602600 | 2.45328900  | -1.31209700 |
| O | 1.13525700  | 2.53719100  | -1.01606000 |
| O | -0.80205000 | 3.40828000  | -1.51112000 |
| C | -2.40174800 | -3.04565000 | -1.06294200 |
| C | -3.63462800 | -2.82453000 | -0.44747700 |
| C | -3.89220800 | -1.63962700 | 0.25534300  |
| C | -2.87281900 | -0.69724900 | 0.32007500  |
| C | -1.62620100 | -0.90518600 | -0.29436600 |
| C | -1.38633900 | -2.07942300 | -0.99465400 |
| N | -2.89465100 | 0.54882700  | 0.97534400  |
| C | -1.68621400 | 1.18301100  | 0.86950200  |
| C | -0.77908100 | 0.34255800  | -0.08041300 |

|   |             |             |             |
|---|-------------|-------------|-------------|
| O | -1.34096700 | 2.21173400  | 1.42691000  |
| H | -2.22314600 | -3.97284100 | -1.59955000 |
| H | -4.41244300 | -3.58073500 | -0.50993200 |
| H | -4.85095600 | -1.47152700 | 0.73500100  |
| H | -0.42342500 | -2.24437600 | -1.46411500 |
| C | -3.98910000 | 1.04502100  | 1.78944100  |
| H | -4.89574800 | 1.15620500  | 1.18568200  |
| H | -4.19183900 | 0.36142700  | 2.62140700  |
| H | -3.69564500 | 2.01835000  | 2.18493400  |
| C | 1.58938800  | -0.39697800 | 0.05224500  |
| O | 1.57383400  | -1.03573200 | -0.99179900 |
| O | 2.65601300  | -0.16135900 | 0.83437700  |
| C | 4.00637100  | -0.64685000 | 0.47750500  |
| C | 4.85944300  | -0.11429500 | 1.63023900  |
| H | 5.90328300  | -0.41616100 | 1.49457900  |
| H | 4.81926400  | 0.97937700  | 1.67077300  |
| H | 4.50850600  | -0.50827200 | 2.59009100  |
| C | 4.44762400  | -0.03287700 | -0.85337100 |
| H | 3.84797200  | -0.40836300 | -1.68451600 |
| H | 4.35900600  | 1.05851400  | -0.81969900 |
| H | 5.49817500  | -0.28287200 | -1.04061600 |
| C | 4.01745400  | -2.17715400 | 0.45189400  |
| H | 5.04371000  | -2.53362600 | 0.30756600  |
| H | 3.65009900  | -2.57990900 | 1.40254300  |
| H | 3.39804400  | -2.56678400 | -0.35831300 |
| N | 0.47734800  | 0.17101700  | 0.62867000  |
| H | 0.66367000  | 0.88164200  | 1.32894800  |

### 5. Lowest-lying transition states for real catalyst

#### *Si-ts2a-real*

|   |             |             |            |
|---|-------------|-------------|------------|
| C | -1.90925000 | 0.90117500  | 0.64863500 |
| C | -2.09155700 | 0.50991500  | 2.11131800 |
| C | -0.96094300 | 0.16318000  | 2.92127300 |
| C | -3.33914200 | 0.54757300  | 2.69866900 |
| C | 0.36969100  | 0.06103000  | 2.43572400 |
| C | -1.21797900 | -0.06831000 | 4.31620600 |
| C | -3.47690000 | 0.26272500  | 4.07588900 |
| H | -4.21774900 | 0.79627700  | 2.11375800 |
| C | 1.41761300  | -0.23460900 | 3.29952500 |
| H | 0.60149700  | 0.21240600  | 1.38636700 |
| C | -0.12127300 | -0.36062300 | 5.17303500 |
| H | -4.46548900 | 0.28569900  | 4.53262600 |

|   |             |             |             |
|---|-------------|-------------|-------------|
| C | 1.15802800  | -0.43256700 | 4.68692100  |
| H | -0.33646800 | -0.52680800 | 6.22443300  |
| H | 1.99861600  | -0.65838500 | 5.33631200  |
| C | -1.36437400 | 2.34717000  | 0.58028500  |
| H | -0.52794400 | 2.37581500  | 1.28092300  |
| C | -2.36878300 | 3.47586000  | 0.90942800  |
| C | 0.20608000  | 3.85495300  | -0.55996800 |
| C | -1.70801800 | 2.98149800  | -1.84403300 |
| C | -2.10810100 | 4.67296300  | -0.02759100 |
| H | -3.39647000 | 3.12812800  | 0.77109600  |
| H | -2.26165600 | 3.76157200  | 1.95894100  |
| C | -0.60368600 | 5.07020900  | -0.01796000 |
| H | 0.99905400  | 3.52570200  | 0.11353600  |
| H | 0.65820300  | 4.05042100  | -1.53174900 |
| C | -2.48542000 | 4.26152900  | -1.46479900 |
| H | -2.35389600 | 2.11120500  | -1.94289200 |
| H | -1.12035900 | 3.08545600  | -2.75780800 |
| H | -2.71133700 | 5.52912000  | 0.28842200  |
| H | -0.48390600 | 5.90292200  | -0.72060300 |
| H | -3.56208900 | 4.07551300  | -1.53199500 |
| H | -2.25149400 | 5.07293700  | -2.16244500 |
| O | 2.69656900  | -0.34011000 | 2.91021900  |
| N | -2.46270700 | -0.02129900 | 4.86907900  |
| N | -0.71446900 | 2.67430000  | -0.75421000 |
| H | 2.76931900  | -0.42591400 | 1.91674700  |
| H | -1.17951500 | 0.24166600  | 0.16864400  |
| O | -3.13737800 | 0.84935100  | -0.08233000 |
| C | 2.57310500  | -0.06834200 | -2.53811400 |
| H | 2.35351100  | -1.12151700 | -2.43661300 |
| H | -0.14173800 | 1.84489000  | -1.07518900 |
| H | 3.26116600  | 0.28653500  | -3.29200900 |
| N | 1.54336500  | 0.78383400  | -2.28009800 |
| O | 0.55851600  | 0.37103400  | -1.56975000 |
| O | 1.58399200  | 1.98457800  | -2.66578300 |
| C | 6.97803700  | -1.38042700 | -2.47070000 |
| C | 7.52468600  | -0.10823400 | -2.65598200 |
| C | 6.86358200  | 1.03875300  | -2.19626700 |
| C | 5.64617000  | 0.86763000  | -1.54832500 |
| C | 5.07371800  | -0.41206900 | -1.35959000 |
| C | 5.74546700  | -1.54042800 | -1.82523500 |
| N | 4.82594700  | 1.85981900  | -0.99473300 |
| C | 3.72102800  | 1.30192800  | -0.38407500 |
| C | 3.80288000  | -0.20530500 | -0.62071200 |
| O | 2.85928100  | 1.90563600  | 0.23802600  |

|   |             |             |             |
|---|-------------|-------------|-------------|
| H | 7.50719800  | -2.25492000 | -2.83794700 |
| H | 8.47851200  | 0.00026200  | -3.16527900 |
| H | 7.29381300  | 2.02506900  | -2.33767700 |
| H | 5.30503400  | -2.52221700 | -1.70416100 |
| C | 5.09960300  | 3.28154600  | -1.02127400 |
| H | 4.29806300  | 3.78262500  | -0.47656400 |
| H | 6.05715600  | 3.50275800  | -0.53625500 |
| H | 5.12513400  | 3.65490600  | -2.05118200 |
| N | 3.14891800  | -0.97163600 | 0.23399100  |
| C | 3.04916800  | -2.33346500 | 0.03466100  |
| O | 3.10996800  | -2.91626400 | -1.04676300 |
| O | 2.78656400  | -2.93122700 | 1.21457600  |
| C | 2.53595200  | -4.37703800 | 1.32106400  |
| C | 2.31486800  | -4.56494800 | 2.82411300  |
| H | 2.10687900  | -5.61735100 | 3.04567300  |
| H | 3.20327600  | -4.26165300 | 3.38823600  |
| H | 1.46769700  | -3.96418900 | 3.17118600  |
| C | 3.76217200  | -5.16814400 | 0.85527000  |
| H | 3.92681300  | -5.05461400 | -0.21762200 |
| H | 4.65884900  | -4.83122100 | 1.38796300  |
| H | 3.61759900  | -6.23196600 | 1.07617600  |
| C | 1.27100400  | -4.74760900 | 0.54052100  |
| H | 1.01187800  | -5.79482000 | 0.73431800  |
| H | 0.43078500  | -4.12390500 | 0.86678600  |
| H | 1.41112000  | -4.61591700 | -0.53397700 |
| C | -0.11092300 | 5.53162300  | 1.33093000  |
| H | -0.05647900 | 4.77676000  | 2.11652200  |
| C | 0.25728200  | 6.78315800  | 1.60887500  |
| H | 0.23339300  | 7.56904400  | 0.85540400  |
| H | 0.59894700  | 7.07084700  | 2.60011900  |
| C | -6.70243400 | 1.08374100  | -2.12782400 |
| C | -5.51257900 | 0.98852800  | -1.43050100 |
| C | -4.85995800 | -0.25585600 | -1.27054900 |
| C | -5.43826800 | -1.43497900 | -1.82954400 |
| C | -6.65459900 | -1.29802600 | -2.53906700 |
| C | -7.27500800 | -0.07068400 | -2.68906900 |
| C | -3.61117000 | -0.35755000 | -0.54544000 |
| C | -4.77477500 | -2.72106500 | -1.65106400 |
| C | -3.55485600 | -2.76213400 | -0.91632100 |
| C | -2.99476600 | -1.55976100 | -0.36766800 |
| C | -2.89696400 | -4.00087600 | -0.72805500 |
| H | -1.96597400 | -4.01632800 | -0.16682500 |
| C | -3.41829800 | -5.17024900 | -1.24733900 |
| C | -4.62301400 | -5.13524100 | -1.97367700 |

|   |             |             |             |
|---|-------------|-------------|-------------|
| C | -5.28347100 | -3.93479100 | -2.16975900 |
| H | -7.19311500 | 2.04674800  | -2.23975300 |
| H | -5.06923000 | 1.87336500  | -0.98903900 |
| H | -7.12106100 | -2.17233900 | -2.97887600 |
| H | -8.20927600 | -0.00269100 | -3.23972400 |
| H | -2.07008000 | -1.64789400 | 0.19048000  |
| H | -2.89982500 | -6.11304500 | -1.09552300 |
| H | -5.03770000 | -6.05196200 | -2.38394000 |
| H | -6.20989200 | -3.93825500 | -2.73380500 |

*Si-ts2b-real*

|   |             |             |             |
|---|-------------|-------------|-------------|
| C | -1.68547500 | -1.36574700 | 0.21057100  |
| C | -2.60667100 | -2.29260100 | -0.57702200 |
| C | -2.34901700 | -2.56862500 | -1.95880100 |
| C | -3.68430200 | -2.90555900 | 0.02762000  |
| C | -1.28222200 | -1.99495800 | -2.69614000 |
| C | -3.23950700 | -3.48652600 | -2.61282700 |
| C | -4.49872300 | -3.78886100 | -0.71735900 |
| H | -3.92180400 | -2.70941000 | 1.06768100  |
| C | -1.09009900 | -2.31858500 | -4.03253800 |
| H | -0.58641200 | -1.30202500 | -2.23738400 |
| C | -3.01464500 | -3.79504500 | -3.98303100 |
| H | -5.34938300 | -4.26866700 | -0.23508100 |
| C | -1.97223700 | -3.23381000 | -4.67535200 |
| H | -3.69893300 | -4.49081200 | -4.45962000 |
| H | -1.79740500 | -3.46743300 | -5.72145300 |
| C | -0.43199800 | -2.15439600 | 0.65483200  |
| H | -0.07623900 | -2.66362100 | -0.24300500 |
| C | -0.65243400 | -3.17193000 | 1.79841800  |
| C | 2.01123500  | -2.09297400 | 0.99715800  |
| C | 0.60556600  | -0.64976700 | 2.41380900  |
| C | 0.55796700  | -3.14500700 | 2.75129100  |
| H | -1.55660300 | -2.92198300 | 2.36025300  |
| H | -0.79953400 | -4.16796300 | 1.37377200  |
| C | 1.88523700  | -3.30925500 | 1.95992800  |
| H | 2.16339300  | -2.37705600 | -0.04438800 |
| H | 2.81566900  | -1.41970200 | 1.28891300  |
| C | 0.58776100  | -1.78046800 | 3.46753900  |
| H | -0.31126100 | -0.06377000 | 2.41068100  |
| H | 1.45730900  | 0.02382300  | 2.51658800  |
| H | 0.46994500  | -3.95273100 | 3.48394300  |
| H | 2.70472200  | -3.25656900 | 2.68608700  |
| H | -0.29230400 | -1.67639800 | 4.11033600  |
| H | 1.47106400  | -1.71348100 | 4.11155800  |

|   |             |             |             |
|---|-------------|-------------|-------------|
| O | -0.09612500 | -1.80762300 | -4.77744300 |
| N | -4.29396900 | -4.08106100 | -1.98697100 |
| N | 0.74517600  | -1.26544800 | 1.04198400  |
| H | 0.43700400  | -1.15294300 | -4.24779700 |
| H | -1.36148000 | -0.53353700 | -0.41979400 |
| O | -2.32323800 | -0.83020400 | 1.37606000  |
| C | 3.16998500  | 0.78510400  | -2.45857900 |
| H | 4.05330500  | 0.37473600  | -1.98977100 |
| H | 0.83332200  | -0.48132500 | 0.35584100  |
| H | 3.26297900  | 1.57097400  | -3.19431200 |
| N | 2.18427600  | -0.12624000 | -2.74184900 |
| O | 1.27762300  | 0.20022500  | -3.57956300 |
| O | 2.13587100  | -1.22559300 | -2.13433500 |
| C | 4.51042800  | 5.11185700  | -1.46881200 |
| C | 3.42106100  | 5.73078300  | -2.08602500 |
| C | 2.17703300  | 5.09061400  | -2.16980100 |
| C | 2.06705600  | 3.82290500  | -1.61421200 |
| C | 3.15982100  | 3.17584500  | -0.99347200 |
| C | 4.38957600  | 3.82718200  | -0.92347600 |
| N | 0.92125100  | 3.00980300  | -1.56083400 |
| C | 1.18870400  | 1.84875900  | -0.89257400 |
| C | 2.65986400  | 1.85715600  | -0.51838900 |
| O | 0.36566000  | 0.97027600  | -0.61905000 |
| H | 5.46599800  | 5.62574900  | -1.41826400 |
| H | 3.53391900  | 6.72421500  | -2.51154700 |
| H | 1.33140500  | 5.57392400  | -2.64832300 |
| H | 5.23919600  | 3.33289000  | -0.46992700 |
| C | -0.36290500 | 3.33595300  | -2.15109500 |
| H | -0.73404000 | 4.28883000  | -1.75975300 |
| H | -0.28014100 | 3.39834200  | -3.24140700 |
| H | -1.06368500 | 2.54314400  | -1.88868200 |
| N | 3.00278100  | 1.07797900  | 0.49120000  |
| C | 4.31901200  | 0.93873900  | 0.85143400  |
| O | 5.30877000  | 1.12783000  | 0.14612400  |
| O | 4.37729000  | 0.45218900  | 2.12162000  |
| C | 5.66265900  | 0.21635300  | 2.79891000  |
| C | 5.22716700  | -0.25445900 | 4.18923600  |
| H | 6.10556500  | -0.45249900 | 4.81259600  |
| H | 4.61681000  | 0.50778900  | 4.68542500  |
| H | 4.64047100  | -1.17746500 | 4.12409200  |
| C | 6.45627000  | 1.52286300  | 2.90622700  |
| H | 6.79704400  | 1.86493500  | 1.92758600  |
| H | 5.84248200  | 2.30864200  | 3.36124500  |
| H | 7.33345600  | 1.36635600  | 3.54428200  |



|   |             |             |             |
|---|-------------|-------------|-------------|
| C | 6.45248400  | -0.88249400 | 2.08104700  |
| H | 7.35543200  | -1.12215200 | 2.65464300  |
| H | 5.85425200  | -1.79757900 | 1.99946700  |
| H | 6.74842000  | -0.56683800 | 1.07942600  |
| C | 1.99488100  | -4.62828000 | 1.23589400  |
| H | 1.33003300  | -4.77566700 | 0.38380200  |
| C | 2.84391300  | -5.60100400 | 1.57048200  |
| H | 2.88184200  | -6.53889000 | 1.02192200  |
| H | 3.53701900  | -5.49696900 | 2.40392400  |
| C | -5.85207500 | 3.40786800  | -1.31478900 |
| C | -4.95847800 | 2.35623000  | -1.24690400 |
| C | -4.54236500 | 1.83215100  | 0.00051900  |
| C | -5.05783600 | 2.39343700  | 1.20431300  |
| C | -5.96987400 | 3.46964100  | 1.10201900  |
| C | -6.36170000 | 3.96794100  | -0.12852200 |
| C | -3.61796000 | 0.73590500  | 0.04688600  |
| C | -4.62052500 | 1.83253900  | 2.47745100  |
| C | -3.70416700 | 0.73842800  | 2.49292800  |
| C | -3.20916400 | 0.21333400  | 1.23796700  |
| C | -3.29243700 | 0.18697500  | 3.72819100  |
| H | -2.60635000 | -0.65189000 | 3.72430400  |
| C | -3.76045000 | 0.69483200  | 4.92576800  |
| C | -4.65860700 | 1.77586900  | 4.92050100  |
| C | -5.07789800 | 2.32566600  | 3.72233900  |
| H | -3.26941500 | 0.33532100  | -0.89741300 |
| H | -6.16321400 | 3.79855300  | -2.27986900 |
| H | -4.56065000 | 1.91273800  | -2.15657000 |
| H | -6.38077200 | 3.92023700  | 1.99908000  |
| H | -7.06624000 | 4.79376100  | -0.17618900 |
| H | -3.43507900 | 0.25919600  | 5.86649400  |
| H | -5.03006500 | 2.18001400  | 5.85825300  |
| H | -5.77546300 | 3.15532700  | 3.74755800  |

*Si-ts2c-real*

|   |             |            |            |
|---|-------------|------------|------------|
| C | -1.93939300 | 0.82255000 | 0.57719100 |
| C | -2.08745200 | 0.42925600 | 2.04499200 |
| C | -0.93646600 | 0.20337800 | 2.86952800 |
| C | -3.33681400 | 0.36853900 | 2.62798900 |
| C | 0.40080000  | 0.19970900 | 2.39154800 |
| C | -1.18058100 | 0.00248800 | 4.27189500 |
| C | -3.45794200 | 0.11015800 | 4.01167100 |
| H | -4.23102300 | 0.52581100 | 2.03574900 |
| C | 1.46493300  | 0.04707900 | 3.27228100 |

|   |             |             |             |
|---|-------------|-------------|-------------|
| H | 0.62036700  | 0.30351500  | 1.33370900  |
| C | -0.06806000 | -0.14246300 | 5.14533400  |
| H | -4.44800400 | 0.05436800  | 4.46260300  |
| C | 1.21587600  | -0.10823900 | 4.66698000  |
| H | -0.27433900 | -0.28326100 | 6.20226500  |
| H | 2.06963900  | -0.21970900 | 5.32889900  |
| C | -1.50912000 | 2.30494100  | 0.50336200  |
| H | -0.62644700 | 2.37713400  | 1.14133000  |
| C | -2.56396400 | 3.34845400  | 0.93895800  |
| C | -0.14378400 | 3.95277200  | -0.70775500 |
| C | -2.09339400 | 2.98461800  | -1.86154400 |
| C | -2.45256700 | 4.59291100  | 0.03548300  |
| H | -3.57189900 | 2.93157200  | 0.85448300  |
| H | -2.40750900 | 3.60398600  | 1.98980700  |
| C | -0.98039200 | 5.08977000  | -0.05007800 |
| H | 0.72963600  | 3.65965000  | -0.12205600 |
| H | 0.19748700  | 4.22204900  | -1.70944900 |
| C | -2.91261900 | 4.20483200  | -1.38342200 |
| H | -2.69030100 | 2.07793700  | -1.93000200 |
| H | -1.60024700 | 3.15181800  | -2.82117100 |
| H | -3.08222000 | 5.39658600  | 0.42843100  |
| H | -0.96880300 | 5.95660900  | -0.72086500 |
| H | -3.97843500 | 3.95559200  | -1.37685300 |
| H | -2.77978800 | 5.04911200  | -2.06839200 |
| O | 2.75247200  | 0.04534900  | 2.89374400  |
| N | -2.42787400 | -0.04889300 | 4.81902700  |
| N | -0.99219300 | 2.71391100  | -0.86748100 |
| H | 2.84577300  | -0.09953300 | 1.90953500  |
| H | -1.16150700 | 0.23098100  | 0.08455600  |
| O | -3.17396100 | 0.67608100  | -0.13572400 |
| C | 2.36761700  | -0.28310800 | -2.48406300 |
| H | 2.55061500  | -1.34436900 | -2.39675400 |
| H | -0.35255500 | 1.97571300  | -1.28859800 |
| H | 2.75589600  | 0.29821700  | -3.30820800 |
| N | 1.18668600  | 0.15110800  | -1.97707000 |
| O | 0.56696100  | -0.54273200 | -1.12701300 |
| O | 0.75648300  | 1.31285800  | -2.32273900 |
| C | 6.95315300  | -0.87555800 | -2.73797900 |
| C | 7.26624800  | 0.43408100  | -3.10981400 |
| C | 6.46570900  | 1.51147100  | -2.70836800 |
| C | 5.35090800  | 1.23290300  | -1.92623500 |
| C | 5.01262100  | -0.08741000 | -1.54695400 |
| C | 5.82192800  | -1.14560500 | -1.95837100 |
| N | 4.43416600  | 2.14906300  | -1.39359900 |

|   |             |             |             |
|---|-------------|-------------|-------------|
| C | 3.49457800  | 1.50695800  | -0.61167500 |
| C | 3.80135900  | 0.01174500  | -0.69441000 |
| O | 2.60529000  | 2.04421100  | 0.03262900  |
| H | 7.58729800  | -1.69560700 | -3.06213700 |
| H | 8.14466700  | 0.62673700  | -3.71993500 |
| H | 6.71481300  | 2.52812000  | -2.99526100 |
| H | 5.56342200  | -2.16111500 | -1.68730000 |
| C | 4.48083100  | 3.58280200  | -1.58869500 |
| H | 3.67931300  | 4.02479200  | -0.99519700 |
| H | 5.44127700  | 3.98980000  | -1.25278300 |
| H | 4.33388500  | 3.83935900  | -2.64424800 |
| N | 3.32927100  | -0.73951000 | 0.27941000  |
| C | 3.43465500  | -2.11824000 | 0.22445800  |
| O | 3.56393800  | -2.79866000 | -0.79065900 |
| O | 3.29784300  | -2.61481500 | 1.46855900  |
| C | 3.27021400  | -4.06172900 | 1.73639100  |
| C | 3.09676900  | -4.11152500 | 3.25655500  |
| H | 3.06208400  | -5.15149700 | 3.59835100  |
| H | 3.93096500  | -3.60949200 | 3.75797700  |
| H | 2.16860300  | -3.61566700 | 3.55942600  |
| C | 4.59904300  | -4.70282500 | 1.32427800  |
| H | 4.73588300  | -4.67579500 | 0.24165400  |
| H | 5.43811100  | -4.18217900 | 1.79972300  |
| H | 4.62022800  | -5.74840600 | 1.65254500  |
| C | 2.06999400  | -4.70388100 | 1.03376500  |
| H | 1.97037600  | -5.74707700 | 1.35523200  |
| H | 1.14686600  | -4.17731100 | 1.30114000  |
| H | 2.18540600  | -4.68336500 | -0.05152200 |
| C | -0.41346600 | 5.52694800  | 1.27761600  |
| H | -0.24143300 | 4.74507200  | 2.01836600  |
| C | -0.11679400 | 6.79003400  | 1.58697400  |
| H | 0.28131100  | 7.06015000  | 2.56190800  |
| H | -0.26008500 | 7.60389500  | 0.87770900  |
| C | -2.88124200 | -5.29350800 | -1.52817600 |
| C | -2.44861100 | -4.08801800 | -1.01008000 |
| C | -3.26615500 | -2.93392100 | -1.06842600 |
| C | -4.55246700 | -3.01583400 | -1.67567900 |
| C | -4.96709000 | -4.26374400 | -2.19665600 |
| C | -4.15195100 | -5.38018600 | -2.12698900 |
| C | -2.79263800 | -1.69145500 | -0.52940800 |
| C | -5.37716900 | -1.81433600 | -1.72455800 |
| C | -4.87837400 | -0.59030600 | -1.18509500 |
| C | -3.55705800 | -0.56533700 | -0.59376600 |
| C | -5.68281700 | 0.57234300  | -1.22702800 |

|   |             |             |             |
|---|-------------|-------------|-------------|
| H | -5.29660600 | 1.49194500  | -0.80317100 |
| C | -6.94480600 | 0.54571000  | -1.79099700 |
| C | -7.44210900 | -0.65383300 | -2.32870900 |
| C | -6.67298600 | -1.80328500 | -2.29289300 |
| H | -1.80535400 | -1.68327700 | -0.08390200 |
| H | -2.24213300 | -6.17074400 | -1.47592700 |
| H | -1.46708500 | -4.00729900 | -0.54976000 |
| H | -5.93994100 | -4.35982700 | -2.66656100 |
| H | -4.49684900 | -6.32573700 | -2.53640000 |
| H | -7.55012500 | 1.44778700  | -1.81441600 |
| H | -8.43346000 | -0.68226900 | -2.77273600 |
| H | -7.08408900 | -2.71545500 | -2.71074100 |

*re-ts2a-real*

|   |             |             |             |
|---|-------------|-------------|-------------|
| C | -2.96286300 | -1.02215800 | -0.40944900 |
| C | -3.43431800 | -1.09249800 | 1.04030200  |
| C | -2.56973400 | -0.72604700 | 2.12239400  |
| C | -4.72834900 | -1.47564800 | 1.33040700  |
| C | -1.20898600 | -0.35498800 | 1.96672900  |
| C | -3.13776700 | -0.77117100 | 3.44285400  |
| C | -5.18001100 | -1.47771800 | 2.66869700  |
| H | -5.40238900 | -1.78754900 | 0.54004200  |
| C | -0.42226800 | -0.07088400 | 3.07585500  |
| H | -0.73935900 | -0.33657500 | 0.99015500  |
| C | -2.31432200 | -0.43706000 | 4.55268100  |
| H | -6.20443300 | -1.77497600 | 2.88959300  |
| C | -0.99745900 | -0.09916300 | 4.37960000  |
| H | -2.76404800 | -0.47329800 | 5.54056900  |
| H | -0.35895200 | 0.14096400  | 5.22473200  |
| C | -3.19162500 | 0.41091700  | -0.94566700 |
| H | -2.80983600 | 1.07447400  | -0.16670000 |
| C | -4.65312600 | 0.78308600  | -1.31134000 |
| C | -2.36737300 | 2.22178400  | -2.39326400 |
| C | -2.70723800 | -0.00450100 | -3.39460100 |
| C | -4.70129500 | 1.38043700  | -2.73235100 |
| H | -5.28635200 | -0.10606700 | -1.27802500 |
| H | -5.04890000 | 1.48811600  | -0.57562100 |
| C | -3.79626800 | 2.64062300  | -2.84116100 |
| H | -2.06466900 | 2.70556000  | -1.46158400 |
| H | -1.61005500 | 2.43986200  | -3.14836200 |
| C | -4.17878000 | 0.32777400  | -3.72949800 |
| H | -2.53284400 | -1.06215600 | -3.21293200 |
| H | -2.01205500 | 0.32897100  | -4.16835000 |
| H | -5.73105200 | 1.65365800  | -2.98114700 |

|   |             |             |             |
|---|-------------|-------------|-------------|
| H | -3.76123900 | 2.92654700  | -3.89876700 |
| H | -4.78846900 | -0.57792600 | -3.66769100 |
| H | -4.25526100 | 0.70624800  | -4.75407000 |
| O | 0.88164600  | 0.23502500  | 3.01160100  |
| N | -4.42711900 | -1.13245700 | 3.69490000  |
| N | -2.31416800 | 0.73612300  | -2.14296500 |
| H | 1.23236500  | 0.22516000  | 2.07591800  |
| H | -1.89357900 | -1.23942200 | -0.48602600 |
| O | -3.68155000 | -1.93825400 | -1.24332300 |
| C | 2.14946800  | -0.65950500 | -2.17043100 |
| H | 2.46465100  | -1.59685800 | -2.60717600 |
| H | -1.30027600 | 0.52113800  | -1.91531600 |
| H | 2.69640100  | 0.25737100  | -2.33217200 |
| N | 0.80449700  | -0.50836900 | -2.05196600 |
| O | 0.35757300  | 0.64936800  | -1.71725700 |
| O | 0.01099900  | -1.47895300 | -2.18856200 |
| C | 6.60899600  | -0.73132900 | -0.94879700 |
| C | 6.74493100  | -2.12139300 | -0.92485200 |
| C | 5.65517400  | -2.94815900 | -0.62520100 |
| C | 4.43464800  | -2.34019600 | -0.35244900 |
| C | 4.27452500  | -0.93434700 | -0.37853200 |
| C | 5.37337700  | -0.12988600 | -0.68030700 |
| N | 3.23210200  | -2.96990400 | -0.01408600 |
| C | 2.24826600  | -2.03796100 | 0.26081200  |
| C | 2.86053600  | -0.65892300 | -0.00749200 |
| O | 1.11963800  | -2.28184500 | 0.65402900  |
| H | 7.46687200  | -0.10811200 | -1.18422200 |
| H | 7.70888900  | -2.57451800 | -1.14055600 |
| H | 5.76420800  | -4.02765600 | -0.60046100 |
| H | 5.25915000  | 0.94550300  | -0.71955600 |
| C | 3.04665600  | -4.40144400 | 0.10234400  |
| H | 3.66246500  | -4.81347900 | 0.91061400  |
| H | 1.99435900  | -4.58509400 | 0.32274700  |
| H | 3.30837200  | -4.90227200 | -0.83628600 |
| N | 2.26974200  | 0.36706400  | 0.57908000  |
| C | 2.65584500  | 1.66257600  | 0.29756300  |
| O | 3.31317200  | 2.04640800  | -0.66678500 |
| O | 2.13213000  | 2.47874500  | 1.23821100  |
| C | 2.30818400  | 3.93585300  | 1.19109200  |
| C | 1.53958400  | 4.40161900  | 2.43032000  |
| H | 1.58955100  | 5.49217000  | 2.51994100  |
| H | 0.48652600  | 4.10683200  | 2.36740000  |
| H | 1.96285700  | 3.95907500  | 3.33811800  |
| C | 1.67382700  | 4.50565100  | -0.08218500 |

|   |             |             |             |
|---|-------------|-------------|-------------|
| H | 2.20874700  | 4.17483100  | -0.97395100 |
| H | 0.62811200  | 4.18668300  | -0.16191100 |
| H | 1.69232600  | 5.60111300  | -0.04611000 |
| C | 3.79249600  | 4.29546600  | 1.31237200  |
| H | 3.90360100  | 5.38214400  | 1.40404400  |
| H | 4.22466100  | 3.83426900  | 2.20772300  |
| H | 4.35411000  | 3.96083000  | 0.43836500  |
| C | -4.30208800 | 3.82600100  | -2.05964500 |
| H | -4.32785000 | 3.71769000  | -0.97444800 |
| C | -4.71010900 | 4.97121600  | -2.60822900 |
| H | -4.69414000 | 5.13068900  | -3.68525900 |
| H | -5.07640200 | 5.79523100  | -2.00096300 |
| C | -0.73394700 | -7.09646500 | 0.28290000  |
| C | -1.00123600 | -5.74096800 | 0.27369200  |
| C | -2.08520900 | -5.21830300 | -0.47206600 |
| C | -2.91638600 | -6.10164600 | -1.21861600 |
| C | -2.61492100 | -7.48354100 | -1.19144700 |
| C | -1.54810700 | -7.97367700 | -0.45829300 |
| C | -2.33840200 | -3.80698000 | -0.46790300 |
| C | -4.03518300 | -5.53869200 | -1.96495100 |
| C | -4.27101700 | -4.13065000 | -1.93377400 |
| C | -3.37869400 | -3.28160900 | -1.17392200 |
| C | -5.37184500 | -3.59085300 | -2.63874000 |
| H | -5.54981000 | -2.52284000 | -2.59402500 |
| C | -6.22036300 | -4.40381000 | -3.36685700 |
| C | -5.98963100 | -5.78957200 | -3.41140100 |
| C | -4.92233300 | -6.33857000 | -2.72345900 |
| H | -1.66289500 | -3.18395500 | 0.10537900  |
| H | 0.10005000  | -7.48511700 | 0.86130100  |
| H | -0.38413300 | -5.04873500 | 0.84109700  |
| H | -3.22635200 | -8.18426000 | -1.74978400 |
| H | -1.34138500 | -9.04044800 | -0.45506100 |
| H | -7.06309000 | -3.97236600 | -3.90028200 |
| H | -6.65203500 | -6.43417000 | -3.98283700 |
| H | -4.77168900 | -7.41143100 | -2.76969400 |

*re-ts2b-real*

|   |            |            |            |
|---|------------|------------|------------|
| C | 1.86218600 | 0.39115600 | 1.06131500 |
| C | 2.66696200 | 1.57861500 | 1.58093000 |
| C | 2.20062600 | 2.91480000 | 1.37038600 |
| C | 3.82405300 | 1.39819800 | 2.30926800 |
| C | 1.05960700 | 3.23201200 | 0.59629400 |
| C | 2.94863200 | 3.97689700 | 1.98055200 |
| C | 4.49318700 | 2.52067300 | 2.85237900 |

|   |             |             |             |
|---|-------------|-------------|-------------|
| H | 4.23237500  | 0.40648700  | 2.47062500  |
| C | 0.66771700  | 4.54755700  | 0.42097200  |
| H | 0.48524000  | 2.46036400  | 0.09899000  |
| C | 2.50132600  | 5.31509500  | 1.80196800  |
| H | 5.40442300  | 2.37022200  | 3.43006800  |
| C | 1.38933100  | 5.59980000  | 1.04712000  |
| H | 3.07720800  | 6.10510200  | 2.27488400  |
| H | 1.05420600  | 6.62208200  | 0.89860200  |
| C | 0.83665500  | -0.05276700 | 2.13887900  |
| H | 0.45761900  | 0.86335600  | 2.59485200  |
| C | 1.37659400  | -1.02795700 | 3.21998000  |
| C | -1.41066300 | -0.96703400 | 2.63452300  |
| C | -0.11182500 | -1.96469600 | 0.78734900  |
| C | 0.59284500  | -2.35632600 | 3.17088900  |
| H | 2.43502100  | -1.22678000 | 3.04492300  |
| H | 1.29520800  | -0.56639500 | 4.20795300  |
| C | -0.89870600 | -2.11924300 | 3.53622000  |
| H | -1.53132600 | -0.03007100 | 3.18195200  |
| H | -2.34878500 | -1.19862900 | 2.12964900  |
| C | 0.64447200  | -2.92052800 | 1.73680300  |
| H | 0.45599900  | -1.70331700 | -0.10448400 |
| H | -1.08185200 | -2.35405400 | 0.47785400  |
| H | 1.03531600  | -3.06973600 | 3.87263200  |
| H | -1.44868000 | -3.03413400 | 3.28538100  |
| H | 1.68331600  | -3.02795100 | 1.41552500  |
| H | 0.18119200  | -3.91200300 | 1.70566700  |
| O | -0.39918100 | 4.88169000  | -0.34006500 |
| N | 4.07777000  | 3.76467400  | 2.71537200  |
| N | -0.40979700 | -0.68677100 | 1.53164100  |
| H | -0.70998400 | 4.07442800  | -0.81479400 |
| H | 1.29851000  | 0.68121800  | 0.17441700  |
| C | -2.42967900 | 0.87555300  | -2.35207000 |
| H | -3.04955800 | 1.52643600  | -2.95240900 |
| H | -0.87869200 | -0.00374100 | 0.90305800  |
| H | -2.33188300 | -0.16697500 | -2.61923500 |
| N | -1.28273900 | 1.47522000  | -1.89538700 |
| O | -0.37048200 | 0.76396500  | -1.38237900 |
| O | -1.19811200 | 2.74023000  | -1.93433500 |
| C | -7.06998100 | 0.99216900  | -2.25868600 |
| C | -7.19312800 | 2.31866400  | -1.83900300 |
| C | -6.19998300 | 2.92582800  | -1.05865400 |
| C | -5.09185100 | 2.16121700  | -0.71720000 |
| C | -4.94554200 | 0.82062700  | -1.13847000 |
| C | -5.94191300 | 0.23523200  | -1.91617300 |

|   |             |             |             |
|---|-------------|-------------|-------------|
| N | -3.99390900 | 2.55187800  | 0.06725900  |
| C | -3.12310700 | 1.50776400  | 0.23566500  |
| C | -3.65663000 | 0.33139000  | -0.57240900 |
| O | -2.10251100 | 1.53011400  | 0.92444700  |
| H | -7.85138800 | 0.54281500  | -2.86471700 |
| H | -8.07084300 | 2.89481300  | -2.11919900 |
| H | -6.29859300 | 3.95584800  | -0.73138000 |
| H | -5.83092100 | -0.78503000 | -2.26125000 |
| C | -3.79676500 | 3.87643200  | 0.62483800  |
| H | -4.59346100 | 4.11896800  | 1.33697200  |
| H | -2.83574300 | 3.88545100  | 1.13906900  |
| H | -3.78388600 | 4.62845100  | -0.17064900 |
| N | -3.27297100 | -0.86945600 | -0.16488600 |
| C | -3.61680400 | -1.98844700 | -0.87560900 |
| O | -3.90285700 | -2.05206400 | -2.07136500 |
| O | -3.50437800 | -3.07799000 | -0.06612300 |
| C | -3.82184300 | -4.43241000 | -0.54527200 |
| C | -3.62429500 | -5.28546600 | 0.71082000  |
| H | -3.83517900 | -6.33744100 | 0.49104500  |
| H | -2.59367300 | -5.21278100 | 1.07574700  |
| H | -4.29695300 | -4.95919300 | 1.51140400  |
| C | -2.84171900 | -4.85512500 | -1.64422400 |
| H | -2.96051800 | -4.24042600 | -2.53798000 |
| H | -1.80694200 | -4.76996500 | -1.29253000 |
| H | -3.01964500 | -5.90268300 | -1.91385900 |
| C | -5.27972900 | -4.50624500 | -1.01166800 |
| H | -5.54598200 | -5.54846400 | -1.22157400 |
| H | -5.95135500 | -4.13654200 | -0.22832000 |
| H | -5.43782600 | -3.91856400 | -1.91724300 |
| O | 2.71076600  | -0.71987600 | 0.74971100  |
| C | 4.25813700  | 0.60844700  | -5.03891600 |
| C | 3.53305000  | 0.69499100  | -3.86621900 |
| C | 3.88483700  | -0.07700300 | -2.73306400 |
| C | 5.00277400  | -0.95735000 | -2.80207600 |
| C | 5.72595500  | -1.02245600 | -4.01596900 |
| C | 5.36462300  | -0.25836500 | -5.11196200 |
| C | 3.11052100  | 0.02373600  | -1.52949600 |
| C | 5.34201000  | -1.74592200 | -1.62390100 |
| C | 4.55274200  | -1.62719700 | -0.44011200 |
| C | 3.42490000  | -0.72026600 | -0.43157400 |
| C | 4.88785300  | -2.38878500 | 0.70375700  |
| H | 4.28526200  | -2.28360200 | 1.59827000  |
| C | 5.96688300  | -3.25294000 | 0.69338000  |
| C | 6.74740100  | -3.37843000 | -0.46868800 |



|   |             |             |             |
|---|-------------|-------------|-------------|
| C | 6.43856000  | -2.63978000 | -1.59690800 |
| H | 2.25896900  | 0.69464700  | -1.54217900 |
| H | 3.97627700  | 1.20694100  | -5.90094600 |
| H | 2.67576600  | 1.35974700  | -3.79612100 |
| H | 6.58229500  | -1.68242000 | -4.10368400 |
| H | 5.93843800  | -0.33091000 | -6.03182400 |
| H | 6.21111200  | -3.83004500 | 1.58108400  |
| H | 7.59696300  | -4.05582000 | -0.48387200 |
| H | 7.05984700  | -2.75483400 | -2.47805700 |
| C | -1.13385200 | -1.82404400 | 4.99499600  |
| C | -1.83558400 | -2.60354700 | 5.81917200  |
| H | -1.96825300 | -2.35076700 | 6.86828900  |
| H | -2.30650100 | -3.52379100 | 5.47738000  |
| H | -0.69159400 | -0.90479800 | 5.38210500  |
